# Supplementary material for: Iridium-catalyzed asymmetric transfer hydrogenation of aromatic ketones with a cinchona alkaloid derived NNP ligand
Source: Royal Society of Chemistry journal article supplement (doi:10.1039/d2ob01422j), 2022-01-01
Supplement: d2ob01422j1.pdf [file d2ob01422j1.pdf]

## Supporting Information

### **Iridium-catalyzed asymmetric transfer hydrogenation of aromatic ketones with cinchona alkaloid derived NNP ligand**

Linlin Li, <sup>a,†</sup> Nana Ma, <sup>a,†</sup> Qian Chen, <sup>a</sup> Hao Sun, <sup>a</sup> Jie Tian, <sup>a</sup> Qian Xu, <sup>a</sup> Chun Li <sup>a,\*</sup> and Lin Zhang <sup>a,\*</sup>

<sup>a</sup> State Key Laboratory of Functions and Applications of Medicinal Plants & School of Pharmaceutical Sciences, Guizhou Medical University, Guiyang 550004, People's Republic of China

<sup>†</sup> Linlin Li and Nana Ma contributed equally to this work.

#### **Table of contents**

|                                                                        |            |
|------------------------------------------------------------------------|------------|
| <b>1. General information.....</b>                                     | <b>S1</b>  |
| <b>2. Synthesis of L11.....</b>                                        | <b>S1</b>  |
| <b>3. General procedure for asymmetric transfer hydrogenation.....</b> | <b>S2</b>  |
| <b>4. NMR Spectra.....</b>                                             | <b>S10</b> |
| <b>5. Chiral analysis.....</b>                                         | <b>S43</b> |

## 1. General information

Unless otherwise mentioned, all experiments were carried out under an atmosphere of argon or using standard Schlenk techniques. All the reagents and solvents were used as supplied commercially without further purification. Solvents were dried with standard procedures and degassed with N<sub>2</sub>. NMR spectra were recorded on a Bruker AVANCE 400 or 600 spectrometer. Chemical shifts are reported in ppm and coupling constants are given in Hz. High-resolution mass spectra (HRMS) were obtained on a Bruker MicroQTOF II instrument were recorded using electrospray ionization (ESI) techniques.

## 2. Synthesis of L11

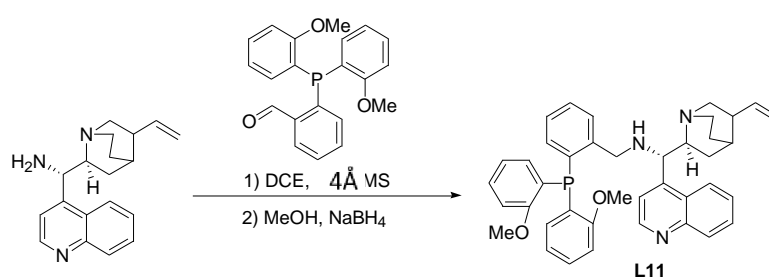

Under argon, to a solution of 9-amino(9-deoxy)epicinchonidine (1.2mmol, 350mg) in 1,2-dichloroethane (10mL) was added 2-diarylphosphanylbenzaldehyde (1.5mmol, 525mg) and 4 Å MS (4.0 g) at room temperature. After stirring for 24 h, the mixture was filtered and the filtrate was concentrated under reduced pressure to afford the solid residue. Subsequently, the solid residue was dissolved in anhydrous and oxygen free MeOH (6mL), and NaBH<sub>4</sub> (3.6mmol, 137mg) was added at 0 °C. The mixture was stirred at room temperature for 4h. The reaction was quenched with water (10mL) and the aqueous layer was extracted with CH<sub>2</sub>Cl<sub>2</sub> (20 mL x 3). The combined organic layers were dried over anhydrous sodium sulfate and filtered. The solvent was concentrated and the crude product was further purified by column chromatography on silica gel (CH<sub>2</sub>Cl<sub>2</sub>/MeOH/ammonia water=20/1/0.1) to give the corresponding ligand **L11** (white solid, 0.28 g, 38% yield). <sup>1</sup>H NMR (400MHz, CDCl<sub>3</sub>): δ 8.90 (s, 1H), 8.23 (d, *J* = 2.0 Hz, 1H), 8.13 (d, *J* = 2.0 Hz, 1H), 7.84 (s, 1H), 7.70 - 7.72 (m, 1H), 7.54 - 7.56 (m, 1H), 7.31 - 7.34 (m, 2H), 7.20 - 7.25 (m, 2H), 7.08 - 7.10 (m, 1H), 6.81 - 6.87 (m, 4H), 6.73 - 6.75 (m, 1H), 6.67 (s, 1H), 6.60 (s, 1H), 5.83 - 5.89 (m, 1H), 5.04 - 5.11 (m, 2H), 4.69 (d, *J* = 2.0 Hz, 1H), 3.93 - 4.07 (m, 1H), 3.71 (s, 3H), 3.65 (s, 3H), 3.38 (d, *J* = 4.0 Hz, 1H), 2.87 (s, 1H), 2.72 (s, 2H), 2.17 (s, 1H), 1.51-1.55 (m, 1H), 1.39-1.43 (m, 2H), 1.26 - 1.31 (m, 2H), 1.12 - 1.16 (m, 1H), 0.85 - 0.90 (m, 1H), 0.70 (s, 1H). <sup>13</sup>C NMR (100MHz, CDCl<sub>3</sub>): δ 161.18, 150.57, 148.93, 148.13, 140.90, 133.89, 133.65, 130.29, 129.94, 129.09, 128.77, 126.99, 126.21, 125.11, 124.99, 124.80, 124.69, 122.90, 121.00, 120.79, 119.96, 114.05, 110.08, 62.36, 57.96, 55.53, 40.74, 31.91, 31.21, 29.68, 29.29, 27.58, 25.24, 22.67. <sup>31</sup>P NMR (166MHz,

CDCl<sub>3</sub>):  $\delta$  -38.41. HRMS (ESI) calcd. for C<sub>40</sub>H<sub>42</sub>N<sub>3</sub>O<sub>2</sub>P [M+H]<sup>+</sup>: 628.3087, found: 628.3078.

### 3. General procedure for asymmetric transfer hydrogenation

All reagents were of analytical grade and used as-received without further purification. Under argon, to a tube were added [Ir(COD)Cl]<sub>2</sub> (1 mg, 0.0015mmol) and L8 (3.7 mg, 0.006 mmol) in oxygen free *i*-PrOH (2 mL) at rt and the mixture was stirred at rt for 30 minutes. After which Cs<sub>2</sub>CO<sub>3</sub> (13 mg, 0.004 mmol) and ketone (0.6 mmol) were added, and the reaction mixture was stirred at 82 °C for 3 h. The product was purified by silica gel chromatography using petroleum ether/ethylacetate as eluent. The enantioselectivity values were analyzed by GC-9790 with a Beta-DEX™120 capillary column (df = 0.25  $\mu$ m, 0.25 mm i.d.×30 m) and LC-16 with Chiralcel OD-H column (25 cm × 4.6 mm). The ee values of chiral alcohols were calculated from the equations enantioselectivity values (ee %) = |R-S|/|R+S|. Optical rotation was measured on the Rudolph Autopol with [ $\alpha$ ]<sub>D</sub><sup>25</sup> values reported in degrees at 25 °C; concentration (c) is in g/100ml.

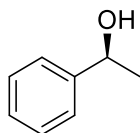

**(S)-1-Phenyl-ethanol (P1):** colorless oil; known compound <sup>[1]</sup>, purified by silica gel chromatography (petroleum ether/ethyl acetate = 10:1), 99% yield, 90% ee, *S* isomer; [ $\alpha$ ]<sub>D</sub><sup>25</sup> = -50.0 (*c* = 1.00 in CHCl<sub>3</sub>) (lit.1[ $\alpha$ ]<sub>D</sub><sup>20</sup> = -42.6 (*c* = 1.00, CHCl<sub>3</sub>)), <sup>1</sup>H NMR (400 MHz, DMSO-*d*<sub>6</sub>)  $\delta$  7.29-7.35 (m, 4H), 7.19-7.23 (m, 1H), 5.17 (d, *J* = 2.0 Hz, 1H), 4.68 - 4.74 (m, 1H), 1.32 (d, *J* = 4.0 Hz, 3H). <sup>13</sup>C NMR (100 MHz, DMSO-*d*<sub>6</sub>)  $\delta$  147.81, 128.44, 126.97, 125.74, 68.55, 26.43.

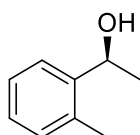

**(S)-1-o-Tolyl-ethanol (P2):** colorless oil; known compound <sup>[2]</sup>, purified by silica gel chromatography (petroleum ether/ethyl acetate = 10:1), 99% yield, 96% ee, *S* isomer; [ $\alpha$ ]<sub>D</sub><sup>25</sup> = -60.8 (*c* = 1.00 in CHCl<sub>3</sub>) (lit.2[ $\alpha$ ]<sub>D</sub><sup>20</sup> = -62.8 (*c* = 1.09, CHCl<sub>3</sub>)); <sup>1</sup>H NMR (400 MHz, CDCl<sub>3</sub>)  $\delta$  7.44 (d, *J* = 4.0 Hz, 1H), 7.05-7.16 (m, 3H), 5.03-5.06 (m, 1H), 2.27 (s, 3H), 1.39 (d, *J* = 4.0 Hz, 3H). <sup>13</sup>C NMR (100 MHz, CDCl<sub>3</sub>)  $\delta$  142.79, 133.20, 129.35, 126.15, 125.35, 123.43, 65.80, 22.90, 17.88.

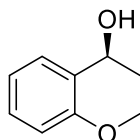

**(S)-1-(2-Methoxy-phenyl)-ethanol (P3):** colorless oil; known compound<sup>[5]</sup>, purified by silica gel chromatography (petroleum ether/ethyl acetate = 10:1), 99% yield, 99% ee, *S* isomer; [ $\alpha$ ]<sub>D</sub><sup>25</sup> = -18.0 (*c* = 1.00 in CHCl<sub>3</sub>) (lit.5[ $\alpha$ ]<sub>D</sub><sup>20</sup> = -28.7 (*c* = 1.24, CHCl<sub>3</sub>)); <sup>1</sup>H NMR (400 MHz, DMSO-*d*<sub>6</sub>)  $\delta$  7.42-7.44 (m, 1H), 7.17-7.21 (m, 1H), 6.91-6.95 (m, 2H), 4.98-5.01 (m, 2H), 3.77 (s, 3H), 1.25 (d, *J* = 4.0 Hz, 3H). <sup>13</sup>C NMR (100 MHz, DMSO-*d*<sub>6</sub>)  $\delta$  155.71, 135.86, 127.87, 125.80, 120.70, 110.78, 62.84, 55.67, 25.13.

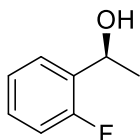

**(S)-1-(2-Fluoro-phenyl)-ethanol (P4):** colorless oil; known compound<sup>[3]</sup>, purified by silica gel chromatography (petroleum ether/ethyl acetate = 10:1), 99% yield, 89% ee, *S* isomer;  $[a]_D^{25} = -37.9$  ( $c = 1.00$  in  $\text{CHCl}_3$ ) (lit.3 $[a]_D^{20} = -43.4$  ( $c = 0.90$ ,  $\text{CHCl}_3$ ));  $^1\text{H NMR}$  (400 MHz,  $\text{DMSO-}d_6$ )  $\delta$  7.50-7.54 (m, 1H), 7.08-7.26 (m, 3H), 5.32 (d,  $J = 2.0$  Hz, 1H), 4.96-5.01 (m, 1H), 1.33(d,  $J = 4.0$  Hz, 3H).  $^{13}\text{C NMR}$  (100 MHz,  $\text{DMSO-}d_6$ )  $\delta$  160.51, 158.10, 134.35, 128.76, 127.42, 124.79, 115.40, 115.59, 62.47, 25.18.

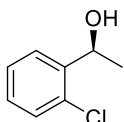

**(S)-1-(2-Chlorophenyl)-ethanol (P5):** colorless oil, known compound<sup>[4]</sup>, purified by silica gel chromatography (petroleum ether/ethyl acetate = 10:1), 99% yield, 96% ee, *S* isomer;  $[a]_D^{25} = -73.0$  ( $c = 1.00$  in  $\text{CHCl}_3$ ) (lit.4 $[a]_D^{20} = -56.8$  ( $c = 1.00$ ,  $\text{CHCl}_3$ ));  $^1\text{H NMR}$  (400 MHz,  $\text{DMSO-}d_6$ )  $\delta$  7.60-7.63 (m, 1H), 7.34 - 7.37 (m, 2H), 7.23-7.27 (m, 1H), 5.40 (d,  $J = 2.0$  Hz, 1H), 4.99-5.05 (m, 1H), 1.31 (d,  $J = 2.0$  Hz, 3H).  $^{13}\text{C NMR}$  (100 MHz,  $\text{DMSO-}d_6$ )  $\delta$  144.97, 130.69, 129.32, 128.67, 127.78, 127.34, 65.43, 24.77.

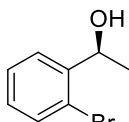

**(S)-1-(2-Bromophenyl)-ethanol (P6):** colorless oil, known compound<sup>[4]</sup>, purified by silica gel chromatography (petroleum ether/ethyl acetate = 10:1), 99% yield, 94% ee, *S* isomer;  $[a]_D^{25} = -64.0$  ( $c = 1.00$  in  $\text{CHCl}_3$ ) (lit.4 $[a]_D^{20} = -40.4$  ( $c = 1.00$ ,  $\text{CHCl}_3$ ));  $^1\text{H NMR}$  (400 MHz,  $\text{DMSO-}d_6$ )  $\delta$  7.59-7.62 (m, 1H), 7.52-7.54 (m, 1H), 7.38-7.41 (m, 1H), 7.15-7.19 (m, 1H), 5.43 (d,  $J = 2.0$  Hz, 1H), 4.93-4.98 (m, 1H), 1.30 (d,  $J = 2.0$  Hz, 3H).  $^{13}\text{C NMR}$  (100 MHz,  $\text{DMSO-}d_6$ )  $\delta$  146.50, 132.55, 129.08, 128.36, 127.61, 121.11, 67.79, 24.86.

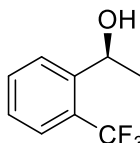

**(S)-1-(2-Trifluoromethyl-phenyl)-ethanol (P7):** colorless oil, known compound<sup>[6]</sup>, purified by silica gel chromatography (petroleum ether/ethyl acetate = 10:1), 99% yield, 95% ee, *S* isomer;  $[a]_D^{25} = -67.4$  ( $c = 1.00$  in  $\text{CHCl}_3$ ) (lit.6 $[a]_D^{20} = -39.1$  ( $c = 1.44$ ,  $\text{CHCl}_3$ ));  $^1\text{H NMR}$  (400 MHz,  $\text{CDCl}_3$ )  $\delta$  7.83 (d,  $J = 4.0$  Hz, 1H), 7.57-7.62 (m, 2H), 7.35-7.38 (m, 1H), 5.31- 5.36 (m, 1H), 1.49 (d,  $J = 4.0$  Hz, 3H).  $^{13}\text{C NMR}$  (100 MHz,  $\text{CDCl}_3$ )  $\delta$  144.01, 131.37, 126.33, 126.06, 125.61, 125.31, 124.72, 124.37, 124.32, 124.26, 124.20, 122.00, 64.68, 64.66, 24.41.

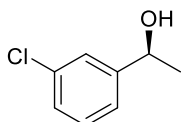

**(S)-1-(3-chlorophenyl)ethanol (P8):** colorless oil, known compound<sup>[4]</sup>, purified by silica gel chromatography (petroleum ether/ethyl acetate = 15:1), 99% yield, 87% ee, *S* isomer;  $[a]_D^{25} = -49.3$  ( $c = 1.00$  in  $\text{CHCl}_3$ ) (lit.4 $[a]_D^{20} = -40.4$  ( $c = 1.00$ ,  $\text{CHCl}_3$ ));  $^1\text{H NMR}$  (600 MHz,  $\text{DMSO-}d_6$ )  $\delta$  7.40 (s, 1H), 7.33 - 7.35 (m, 1H), 7.26 - 7.30 (m, 2H), 5.30 (d,  $J = 1.5$  Hz, 1H), 4.72 - 4.75 (m, 1H), 1.32 (d,  $J = 6.0$  Hz, 3H).  $^{13}\text{C NMR}$  (150 MHz,  $\text{DMSO-}d_6$ )  $\delta$  150.52, 133.27, 130.37, 126.85, 125.63,

124.47, 67.95, 26.24.

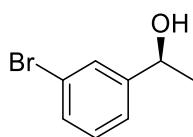

**(S)-1-(3-bromophenyl)ethan-1-ol (P9):** Colorless oil, known compound<sup>[8]</sup>, purified by silica gel chromatography (petroleum ether/ethyl acetate = 15:1), 99% yield, 87% ee, *S* isomer;  $[a]_D^{25} = -31.8$  ( $c = 1.00$  in  $\text{CHCl}_3$ ) (lit.8 $[a]_D^{20} = -28.8$  ( $c = 2.80$ ,  $\text{CHCl}_3$ ));  $^1\text{H NMR}$  (600 MHz,  $\text{DMSO-}d_6$ )  $\delta$  7.53 (s, 1H), 7.41 (d,  $J = 3.0$  Hz, 1H), 7.34 (d,  $J = 3.0$  Hz, 1H), 7.27 - 7.29 (m, 1H), 5.31 (d,  $J = 3.0$  Hz, 1H), 4.70 - 4.73 (m, 1H), 1.32 (d,  $J = 3.0$  Hz, 3H).  $^{13}\text{C NMR}$  (150 MHz,  $\text{DMSO-}d_6$ )  $\delta$  150.71, 130.72, 129.76, 128.52, 124.87, 121.95, 67.90, 26.26.

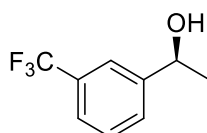

**(S)-1-(3-(trifluoromethyl)phenyl)ethan-1-ol (P10):** colorless oil, known compound<sup>[11]</sup>, purified by silica gel chromatography (petroleum ether/ethyl acetate = 15:1), 99% yield, 84% ee, *S* isomer;  $[a]_D^{25} = -18.0$  ( $c = 1.00$  in  $\text{CHCl}_3$ ) (lit.11 $[a]_D^{20} = -31$  ( $c = 1.95$ ,  $\text{CHCl}_3$ ));  $^1\text{H NMR}$  (600 MHz,  $\text{DMSO-}d_6$ )  $\delta$  7.69 (s, 1H), 7.65 (d,  $J = 3.0$  Hz, 1H), 7.54 - 7.59 (m, 2H), 5.39 (d,  $J = 3.0$  Hz, 1H), 4.81 - 4.85 (m, 1H), 1.35 (d,  $J = 3.0$  Hz, 3H).  $^{13}\text{C NMR}$  (150 MHz,  $\text{DMSO-}d_6$ )  $\delta$  149.31, 129.98, 129.52, 125.77, 123.97, 123.70, 122.15, 67.91, 26.26.

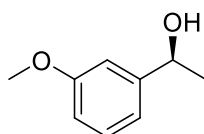

**(S)-1-(3-methoxyphenyl)ethan-1-ol (P11):** colorless oil; known compound<sup>[7]</sup>, purified by silica gel chromatography (petroleum ether/ethyl acetate = 15:1), 98% yield, 90% ee, *S* isomer;  $[a]_D^{25} = -39.2$  ( $c = 1.00$  in  $\text{CHCl}_3$ ) (lit.7 $[a]_D^{20} = -42.1$  ( $c = 1.00$ ,  $\text{CHCl}_3$ ));  $^1\text{H NMR}$  (600 MHz,  $\text{DMSO-}d_6$ )  $\delta$  7.21-7.23 (m, 1H), 6.91 (d,  $J = 6.0$ Hz, 2H), 6.78 (d,  $J = 6.0$ Hz, 1H), 5.15 (d,  $J = 3.0$ Hz, 1H), 4.68-4.71 (m, 1H), 3.75 (s, 1H), 1.32 (d,  $J = 3.0$ Hz, 3H).  $^{13}\text{C NMR}$  (150 MHz,  $\text{DMSO-}d_6$ )  $\delta$  159.62, 149.65, 129.47, 117.99, 112.33, 111.30, 68.48, 55.35, 26.42.

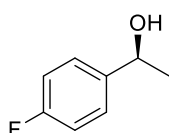

**(S)-1-(4-Fluoro-phenyl)-ethanol (P12):** colorless oil, known compound<sup>[9]</sup>, purified by silica gel chromatography (petroleum ether/ethyl acetate = 10:1), 98% yield, 81% ee *S* isomer;  $[a]_D^{25} = -53.5$  ( $c = 1.00$  in  $\text{CHCl}_3$ ) (lit.9  $[a]_D^{20} = -44.8$  ( $c = 1.40$ ,  $\text{CHCl}_3$ ));  $^1\text{H NMR}$  (600 MHz,  $\text{DMSO-}d_6$ )  $\delta$  7.36 - 7.38 (m, 2H), 7.11 - 7.14(m, 2H), 5.20 (d,  $J = 3.0$  Hz, 1H), 4.70 - 4.74 (m, 1H), 1.31 (d,  $J = 6.0$  Hz, 3H).  $^{13}\text{C NMR}$  (150 MHz,  $\text{DMSO-}d_6$ )  $\delta$  162.23, 160.63, 143.99, 127.64, 127.59, 115.14, 115.00, 67.91, 26.43.

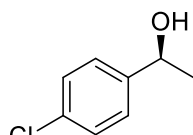

**(S)-1-(4-chlorophenyl)ethan-1-ol (P13):** colorless oil, known compound<sup>[8]</sup>, purified by silica gel chromatography (petroleum ether/ethyl acetate = 10:1), 99% yield, 93% ee, *S* isomer;  $[a]_D^{25} = -40.4$  ( $c = 1.00$  in  $\text{CHCl}_3$ ) (lit.8  $[a]_D^{20} = -36.2$  ( $c = 2.20$ ,  $\text{CHCl}_3$ ));  $^1\text{H NMR}$  (400 MHz,

DMSO- $d_6$ )  $\delta$  7.36 (s, 4H), 5.29 (d,  $J$  = 2.0 Hz, 1H), 4.74 – 4.70 (m, 1H), 1.30 (d,  $J$  = 2.0 Hz, 3H).  $^{13}\text{C}$  NMR (100 MHz, DMSO- $d_6$ )  $\delta$  146.81, 131.39, 128.39, 127.65, 67.89, 26.29.

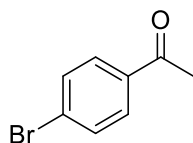

**(S)-1-(4-bromophenyl)ethan-1-ol (P14):** colorless oil, known compound<sup>[8]</sup>, purified by silica gel chromatography (petroleum ether/ethyl acetate = 10:1), 99% yield, 86% ee, *S* isomer;  $[\alpha]_{\text{D}}^{25}$  = -28.3 ( $c$  = 1.00 in  $\text{CHCl}_3$ ). (lit.8 $[\alpha]_{\text{D}}^{20}$  = -28.1 ( $c$  = 2.20,  $\text{CHCl}_3$ ));  $^1\text{H}$  NMR (400 MHz, DMSO- $d_6$ )  $\delta$  7.65 – 7.48 (m, 2H), 7.30 (d,  $J$  = 4.0 Hz, 2H), 5.29 (d,  $J$  = 2 Hz, 1H), 4.72 – 4.68 (m, 1H), 1.30 (d,  $J$  = 2.0 Hz, 3H).  $^{13}\text{C}$  NMR (100 MHz, DMSO- $d_6$ )  $\delta$  142.25, 131.30, 128.06, 119.86, 67.92, 26.26.

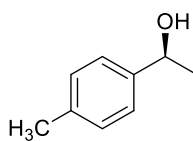

**(S)-1-1-p-Tolyl-ethanol (P15):** colorless oil, known compound<sup>[4]</sup>, purified by silica gel chromatography (petroleum ether/ethyl acetate = 10:1), 96% yield, 88% ee, *S* isomer;  $[\alpha]_{\text{D}}^{25}$  = -66.1 ( $c$  = 1.00 in  $\text{CHCl}_3$ ) (lit.4 $[\alpha]_{\text{D}}^{20}$  = -52.1 ( $c$  = 1.00,  $\text{CHCl}_3$ ));  $^1\text{H}$  NMR (600 MHz, DMSO- $d_6$ )  $\delta$  7.23 (d,  $J$  = 3.0 Hz, 2H), 7.12 (d,  $J$  = 3.0 Hz, 2H), 5.07 (d,  $J$  = 3.0 Hz, 1H), 4.66 - 4.70 (m, 1H), 2.28 (s, 3H), 1.31 (d,  $J$  = 3.0 Hz, 3H).  $^{13}\text{C}$  NMR (150 MHz, DMSO- $d_6$ )  $\delta$  144.87, 135.86, 128.97, 125.69, 68.37, 26.45, 21.13.

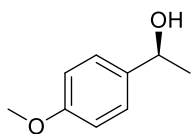

**(S)-1-(4-Methoxy-phenyl)-ethanol (P16):** colorless oil, known compound<sup>[4]</sup>, purified by silica gel chromatography (petroleum ether/ethyl acetate = 10:1), 88% yield, 85% ee, *S* isomer;  $[\alpha]_{\text{D}}^{25}$  = -39.7 ( $c$  = 1.00 in  $\text{CHCl}_3$ ) (lit.4 $[\alpha]_{\text{D}}^{20}$  = -41.7 ( $c$  = 1.00,  $\text{CHCl}_3$ ));  $^1\text{H}$  NMR (400 MHz, DMSO- $d_6$ )  $\delta$  7.25 (d,  $J$  = 6.0 Hz, 2H), 6.86 (d,  $J$  = 4.0 Hz, 2H), 5.06 (d,  $J$  = 2.0 Hz, 1H), 4.65 - 4.66 (m, 1H), 3.72 (s, 3H), 1.29 (d,  $J$  = 4.0 Hz, 3H).  $^{13}\text{C}$  NMR (100 MHz, DMSO- $d_6$ )  $\delta$  158.42, 139.84, 126.90, 113.80, 68.11, 55.49, 26.41.

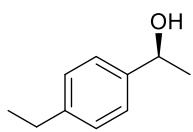

**(S)-1-(4-ethylphenyl)ethan-1-ol (P17):** colorless oil; known compound<sup>[3]</sup>, purified by silica gel chromatography (petroleum ether/ethyl acetate = 10:1), 99% yield, 91% ee, *S* isomer;  $[\alpha]_{\text{D}}^{25}$  = -47.8 ( $c$  = 1.00 in  $\text{CHCl}_3$ ) (lit.3 $[\alpha]_{\text{D}}^{20}$  = -50.1 ( $c$  = 1.00,  $\text{CHCl}_3$ ));  $^1\text{H}$  NMR (600 MHz, DMSO- $d_6$ )  $\delta$  7.25 (d,  $J$  = 3.0 Hz, 2H), 7.14 (d,  $J$  = 6.0 Hz, 2H), 5.07 (d,  $J$  = 3.0 Hz, 1H), 4.67 - 4.70 (m, 1H), 2.55 - 2.59 (m, 2H), 1.31 (d,  $J$  = 3.0 Hz, 3H), 1.15 - 1.18 (m, 3H).  $^{13}\text{C}$  NMR (150 MHz, DMSO- $d_6$ )  $\delta$  145.13, 142.36, 127.76, 125.76, 68.40, 28.32, 26.41, 16.24.

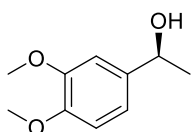

**(S)-1-(3,4-dimethoxyphenyl)ethan-1-ol (P18):** Colorless oil, known compound<sup>[13]</sup>, purified by silica gel chromatography (petroleum ether/ethyl acetate = 10:1), 98% yield, 84% ee, *S* isomer;  $[\alpha]_{\text{D}}^{25}$  = -28.3 ( $c$  = 1.00 in  $\text{CHCl}_3$ ) (lit.13 $[\alpha]_{\text{D}}^{20}$  = -37.3 ( $c$  = 1.09,  $\text{CHCl}_3$ ));  $^1\text{H}$

NMR (600 MHz, DMSO-*d*<sub>6</sub>)  $\delta$  6.95 (m, 1H), 6.83 - 6.88 (m, 2H), 5.05 (d, *J* = 3.0 Hz, 1H), 4.64 - 4.68 (m, 1H), 3.74 (d, *J* = 6.0 Hz, 3H), 1.31 (d, *J* = 3.0 Hz, 1H). <sup>13</sup>C NMR (150 MHz, DMSO-*d*<sub>6</sub>)  $\delta$  148.97, 147.94, 140.53, 117.65, 111.98, 109.78, 68.34, 56.03, 26.45.

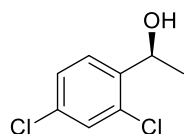

**(S)-1-(2,4-dichlorophenyl)ethan-1-ol (P19):** colorless oil, known compound<sup>[9]</sup>, purified by silica gel chromatography (petroleum ether/ethyl acetate = 10:1), 99% yield, 88% ee, *S* isomer;  $[\alpha]_{\text{D}}^{25} = -48.7$  (*c* = 1.00 in CHCl<sub>3</sub>) (lit.9 $[\alpha]_{\text{D}}^{20} = -21.6$  (*c* = 0.50, CHCl<sub>3</sub>)); <sup>1</sup>H NMR (600 MHz, DMSO-*d*<sub>6</sub>)  $\delta$  7.62 (d, *J* = 6.0 Hz, 1H), 7.52 (d, *J* = 3.0 Hz, 1H), 7.43 - 7.45 (m, 1H), 5.47 (d, *J* = 3.0 Hz, 1H), 4.97 - 5.01 (m, 1H), 1.30 (d, *J* = 3.0 Hz, 3H). <sup>13</sup>C NMR (150 MHz, DMSO-*d*<sub>6</sub>)  $\delta$  144.17, 132.20, 131.55, 128.84, 128.70, 127.98, 65.15, 24.56.

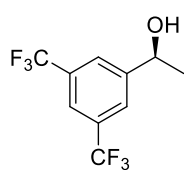

**(S)-1-(3,5-Bis-trifluoromethyl-phenyl)-ethanol (P20):** colorless oil, known compound<sup>[14]</sup>, purified by silica gel chromatography (petroleum ether/ethyl acetate = 10:1), 99% yield, 80% ee, *S* isomer;  $[\alpha]_{\text{D}}^{25} = -17.0$  (*c* = 1.00 in CHCl<sub>3</sub>) (lit.14 $[\alpha]_{\text{D}}^{20} = -24$  (*c* = 1.00, CHCl<sub>3</sub>)); <sup>1</sup>H NMR (600 MHz, DMSO-*d*<sub>6</sub>)  $\delta$  8.04 (s, 2H), 7.95 (s, 2H), 5.62 (d, *J* = 3.0 Hz, 1H), 4.93 - 4.97 (m, 1H), 1.39 (d, *J* = 3.0 Hz, 3H). <sup>13</sup>C NMR (150 MHz, DMSO-*d*<sub>6</sub>)  $\delta$  151.4, 130.16-130.59 (CF<sub>3</sub>), 126.55, 124.84, 123.03, 120.70, 67.44, 26.04.

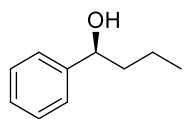

**(S)-1-Phenyl-butan-1-ol (P21):** colorless oil, known compound<sup>[2]</sup>, purified by silica gel chromatography (petroleum ether/ethyl acetate = 10:1), 99% yield, 92% ee, *S* isomer;  $[\alpha]_{\text{D}}^{25} = -57.8$  (*c* = 1.00 in CHCl<sub>3</sub>) (lit.2 $[\alpha]_{\text{D}}^{20} = -44.2$  (*c* = 0.99, CHCl<sub>3</sub>)); <sup>1</sup>H NMR (400 MHz, DMSO-*d*<sub>6</sub>)  $\delta$  7.31 (d, *J* = 2.0 Hz, 4H), 7.18 - 7.24 (m, 1H), 5.12 (d, *J* = 2.0 Hz, 1H), 4.48 - 4.53 (m, 1H), 1.47 - 1.64 (m, 2H), 1.20 - 1.37 (m, 2H), 0.84 - 0.87 (m, 3H). <sup>13</sup>C NMR (100 MHz, DMSO-*d*<sub>6</sub>)  $\delta$  146.90, 128.37, 127.00, 126.23, 72.50, 42.03, 19.00, 14.36.

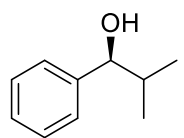

**(S)-2-methyl-1-phenylpropan-1-ol (P22):** colorless oil, purified by silica gel chromatography (petroleum ether/ethyl acetate = 10:1), 99% yield, 99% ee, *S* isomer;  $[\alpha]_{\text{D}}^{25} = -33.2$  (*c* = 1.00 in CHCl<sub>3</sub>); <sup>1</sup>H NMR (400 MHz, CDCl<sub>3</sub>)  $\delta$  7.2 (m, 5H), 4.27 (d, *J* = 2.0 Hz, 1H), 1.90-1.85 (m, 3H), 0.92 (d, *J* = 4.0 Hz, 3H), 0.72 (d, *J* = 2.0 Hz, 3H). <sup>13</sup>C NMR (CDCl<sub>3</sub>, 100 MHz)  $\delta$  142.59, 127.14, 126.37, 125.54, 79.00, 34.20, 17.95, 17.23.

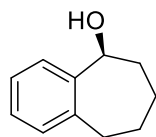

**(S)-6,7,8,9-tetrahydro-5H-benzo[7]annulen-5-ol (P23):** white solid, known compound<sup>[11]</sup>, purified by silica gel chromatography (petroleum ether/ethyl acetate = 10:1), 99%

yield, 98% ee, *S* isomer;  $[a]_D^{25} = -32.7$  ( $c = 1.00$  in  $\text{CHCl}_3$ ) (lit.11 $[a]_D^{20} = -30.3$  ( $c=1.00$ ,  $\text{CHCl}_3$ ));  $^1\text{H}$  NMR (600 MHz,  $\text{DMSO-}d_6$ )  $\delta$  7.44 (d,  $J = 3.0$  Hz, 1H), 7.13 - 7.16 (m, 1H), 7.05 - 7.09 (m, 2H), 5.17 (s, 1H), 4.74 (d,  $J = 6.0$  Hz, 1H), 2.80 - 2.83 (m, 1H), 2.65 - 2.69 (m, 1H), 1.87 - 1.95 (m, 2H), 1.70 - 1.75 (m, 2H), 1.49 - 1.52 (m, 1H), 1.24 - 1.27 (m, 1H).  $^{13}\text{C}$  NMR (150 MHz,  $\text{DMSO-}d_6$ )  $\delta$  146.18, 140.58, 129.27, 126.58, 126.06, 125.0, 71.99, 37.74, 35.46, 27.89.

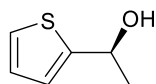

**(S)-1-(Thiophen-2-yl)ethan-1-ol (P24):** colorless oil; known compound<sup>[11]</sup>, purified

by silica gel chromatography (petroleum ether/ethyl acetate = 10:1), 85% yield, 85% ee, *S* isomer;  $[a]_D^{25} = -15.6$  ( $c = 1.00$  in  $\text{CHCl}_3$ ) (lit.11 $[a]_D^{20} = -44.5$  ( $c = 1.65$ ,  $\text{CHCl}_3$ ));  $^1\text{H}$  NMR (400 MHz,  $\text{DMSO-}d_6$ )  $\delta$  7.35(d,  $J = 2.0$  Hz, 1H), 6.91 - 6.95 (m, 2H), 5.50 (d,  $J = 2.0$  Hz, 1H), 4.91 - 4.97 (m, 1H), 1.41 (d,  $J = 4.0$  Hz, 3H).  $^{13}\text{C}$  NMR (100 MHz,  $\text{DMSO-}d_6$ )  $\delta$  152.40, 126.94, 124.25, 122.75, 64.86, 26.40.

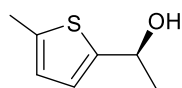

**(S)-1-(5-Methylthiophen-2-yl)ethan-1-ol (P25):** light yellow oil, known

compound<sup>[10]</sup>, purified by silica gel chromatography (petroleum ether/ethyl acetate = 10:1), 99% yield, 90% ee, *S* isomer;  $[a]_D^{25} = -16.7$  ( $c = 1.00$  in  $\text{CHCl}_3$ ) (lit.10 $[a]_D^{20} = -41.8$  ( $c = 1.00$ ,  $\text{CHCl}_3$ ));  $^1\text{H}$  NMR (400 MHz,  $\text{DMSO-}d_6$ )  $\delta$  6.68 (d,  $J = 2.0$  Hz, 2H), 6.60 (d,  $J = 2.0$  Hz, 1H), 5.37 (d,  $J = 2.0$  Hz, 1H), 4.82 - 4.85 (m, 1H), 2.38 (s, 1H), 1.37 (d,  $J = 4.0$  Hz, 3H).  $^{13}\text{C}$  NMR (100 MHz,  $\text{DMSO-}d_6$ )  $\delta$  149.83, 137.50, 124.91, 122.52, 64.89, 26.22, 15.49.

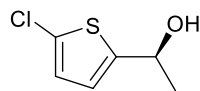

**(S)-1-(5-Chlorothiophen-2-yl)ethan-1-ol (P26):** light yellow oil, known

compound<sup>[12]</sup>, purified by silica gel chromatography (petroleum ether/ethyl acetate = 10:1), 96% yield, 80% ee, *S* isomer;  $[a]_D^{25} = -17.3$  ( $c=1.00$  in  $\text{CHCl}_3$ ) (lit.12 $[a]_D^{20} = -11.4$  ( $c = 1.00$ ,  $\text{CHCl}_3$ ));  $^1\text{H}$  NMR (400 MHz,  $\text{DMSO-}d_6$ )  $\delta$  6.93(d,  $J = 2.0$  Hz, 1H), 6.77 (d,  $J = 2.0$  Hz, 1H), 5.68 (d,  $J = 2.0$  Hz, 1H), 4.83 - 4.89 (m, 1H), 1.38 (d,  $J = 4.0$  Hz, 3H).  $^{13}\text{C}$  NMR (100 MHz,  $\text{DMSO-}d_6$ )  $\delta$  152.01, 126.68, 126.30, 122.30, 65.02, 25.91.

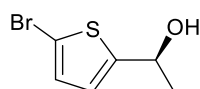

**(S)-1-(5-Bromothiophen-2-yl)ethan-1-ol (P27):** colorless oil, known

compound<sup>[12]</sup>, purified by silica gel chromatography (petroleum ether/ethyl acetate = 10:1), 99% yield, 80% ee, *S* isomer;  $[a]_D^{25} = -11.6$  ( $c = 1.00$  in  $\text{CHCl}_3$ ) (lit.12 $[a]_D^{20} = -9.5$  ( $c = 1.00$ ,  $\text{CHCl}_3$ ));  $^1\text{H}$  NMR (400 MHz,  $\text{DMSO-}d_6$ )  $\delta$  7.03 (d,  $J = 2.0$  Hz, 1H), 6.75 (d,  $J = 2.0$  Hz, 1H), 5.67 (d,  $J = 4.0$  Hz, 1H), 4.85 - 4.90 (m, 1H), 1.38 (d,  $J = 4.0$  Hz, 3H).  $^{13}\text{C}$  NMR (100 MHz,  $\text{DMSO-}d_6$ )  $\delta$  154.70, 130.21, 123.37, 109.37, 65.06, 25.96.

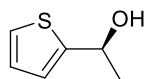

**(S)-1-(Thiophen-2-yl)propan-1-ol (P28):** light yellow oil, known compound<sup>[11]</sup>,

purified by silica gel chromatography (petroleum ether/ethyl acetate = 10:1), 99% yield, 99% ee, *S* isomer;  $[a]_D^{25} = -16.0$  ( $c = 1.00$  in  $\text{CHCl}_3$ ) (lit.11 $[a]_D^{20} = -22.1$  ( $c = 0.90$ ,  $\text{CHCl}_3$ ));  $^1\text{H}$  NMR (400 MHz,  $\text{CDCl}_3$ )  $\delta$  7.24 (d,  $J = 2.0$  Hz, 1H), 6.94 - 6.96 (m, 2H), 4.81 - 4.84 (m, 1H), 2.13 (s, 1H), 1.83 - 1.90 (m, 2H), 0.94 - 0.97 (m, 3H).  $^{13}\text{C}$  NMR (100 MHz,  $\text{CDCl}_3$ )  $\delta$  146.83, 124.76, 122.65, 121.96, 69.92, 30.41, 8.34.



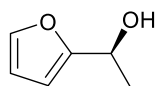

**(S)-1-(Furan-2-yl)ethan-1-ol (P29):** colorless oil, known compound<sup>[9]</sup>, purified by silica gel chromatography (petroleum ether/ethyl acetate = 10:1), 99%yield, 93% ee, *S* isomer;  $[a]_D^{25} = -12.0$  ( $c = 1.00$  in  $\text{CHCl}_3$ ) (lit.9 $[a]_D^{20} = -31.2$  ( $c = 0.50$ ,  $\text{CHCl}_3$ ));  $^1\text{H NMR}$  (400 MHz,  $\text{CDCl}_3$ );  $\delta$  7.37 (d,  $J = 2.0$  Hz, 1H), 6.33 (d,  $J = 2.0$  Hz, 1H), 6.22 (d,  $J = 2.0$  Hz, 1H), 4.85 - 4.90 (m, 1H), 2.08 (s, 1H), 1.54 (d,  $J = 4.0$  Hz, 3H).  $^{13}\text{C NMR}$  (100 MHz,  $\text{CDCl}_3$ )  $\delta$  157.63, 141.91, 110.13, 105.11, 63.62, 21.27.

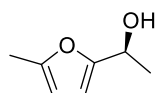

**(S)-1-(5-methylfuran-2-yl)ethan-1-ol (P30):** colorless oil; purified by silica gel chromatography (petroleum ether/ethyl acetate = 10:1), 69% yield, 81% ee, *S* isomer;  $[a]_D^{25} = -7.4$  ( $c = 1.00$  in  $\text{CHCl}_3$ ).  $^1\text{H NMR}$  (400 MHz,  $\text{DMSO}-d_6$ )  $\delta$  6.06 (s, 1H), 5.95 (s, 1H), 5.12 (s, 1H), 4.60 (s, 1H), 2.23 (d,  $J = 2.0$  Hz, 3H), 1.32 - 1.35 (m, 3H).  $^{13}\text{C NMR}$  (100 MHz,  $\text{DMSO}-d_6$ )  $\delta$  157.66, 150.41, 106.43, 105.66, 62.16, 22.43, 13.75. HRMS:  $[\text{M}+\text{Na}]^+$  calcd for  $\text{C}_7\text{H}_{10}\text{NaO}_2$  149.0573, found 149.0575.

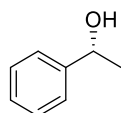

**(R)-1-phenyl-ethanol (P31):** colorless oil; purified by silica gel chromatography (petroleum ether/ethyl acetate = 10:1), 95% yield, 82% ee, *R* isomer;  $[a]_D^{25} = +38.1$  ( $c = 1.00$  in  $\text{CHCl}_3$ ) (lit.15 $[a]_D^{20} = +41.9$  ( $c = 1.10$ ,  $\text{CHCl}_3$ )).

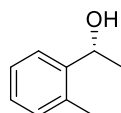

**(R)-1-o-Tolyl-ethanol (P32):** colorless oil; purified by silica gel chromatography (petroleum ether/ethyl acetate = 10:1), 96% yield, 98% ee, *R* isomer;  $[a]_D^{25} = +74.3$  ( $c = 1.00$  in  $\text{CHCl}_3$ ) (lit.16 $[a]_D^{20} = +79.8$  ( $c = 1.00$ ,  $\text{CHCl}_3$ )).

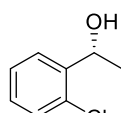

**(R)-1-(2-Chlorophenyl)-ethanol (P33):** colorless oil, purified by silica gel chromatography (petroleum ether/ethyl acetate = 10:1), 99% yield, 95%ee, *R* isomer;  $[a]_D^{25} = +62.5$  ( $c = 1.00$  in  $\text{CHCl}_3$ ) (lit.16 $[a]_D^{20} = +66.8$  ( $c = 1.00$ ,  $\text{CHCl}_3$ )).

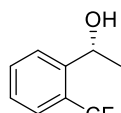

**(R)-1-(2-Trifluoromethyl-phenyl)-ethanol (P34):** colorless oil, purified by silica gel chromatography (petroleum ether/ethyl acetate = 10:1), 99% yield, 99%ee, *R* isomer;  $[a]_D^{25} = +26.5$  ( $c = 1.00$  in  $\text{CHCl}_3$ ) (lit.17 $[a]_D^{20} = +25.8$  ( $c = 1.00$ ,  $\text{CHCl}_3$ )).

#### Reference:

[1] C. Holec, K. Neufeld, J. Pietruszka, *Adv. Syn. Catal.*, 2016, **358**,1810-1019.

- [2] B. Stegink, L. Van Boxtel, L. Lefort, A. J. Minnaard, B. L.Feringa, J. G. De Vries, *Adv. Syn. Catal.*, 2010, **352**, 2621-2628.
- [3] S. S. Liu, H. Liu, H. F. Zhou, Q. X. Liu, J. L. Lv, *Org. Lett.*, 2018, **20**, 1110-1113.
- [4] Z. Q. Liang, T. L. Yang, G. X. Gu, L. Dang, X. M. Zhang, *Chinese J Chem.*, 2018, **36**, 851-856.
- [5] C. Qin, C. J. Hou, H. Z. Liu, Y. J. Liu, D. Z. Huang, X. P. Hu, *Tetrahedron Lett.*, 2018, **59**, 719-722.
- [6] Y. Li, S. Yu, X. Wu, J. Xiao, W. Shen, Z. Dong, J. Gao, *J. Am. Chem. Soc.*, 2014, **136**, 4031-4039.
- [7] J. H. Xie, X. Y. Liu, J. B. Xie, L. X. Wang, Q. L. Zhou, *Angew. Chem. Int. Ed.*, 2011, **50**, 7329-7332.
- [8] C. A. Swamy P, A. Varenikov, G. D. Ruiter, *Organometallics.*, 2020, **39**, 247-257.
- [9] D. R. Li, A. Y. He, J. R. Falck, *Org. Lett.*, 2010, **12**, 1756-1759.
- [10] F. Ling, S. F. Nian, J. C. Chen, W. J. Luo, Z. Wang, Y. P. Lv, W. H. Zhong, *J. Org. Chem.*, 2018, **83**, 10749-10761.
- [11] A. Kišić, M. Stephan, B. Mohar, *Adv. Syn. Catal.*, 2015, **357**, 2540-2546.
- [12] C. Li, X. Lu, M. Wang, L. Zhang, J.Jing, S. Yan, Y. Yang, Y. Zhao, L. Zhang, *Tetrahedron Lett.*, 2020, **61**, 152356.
- [13] J. I. Ito, T. Teshima, H. Nishiyama, *Chem. Commun.*, 2012, **48**, 1105-1107.
- [14] V. S. Dorokhov, Y. V. Nelyubina, S. L. Ioffe, A. Y. Sukhorukov, *J. Org. Chem.*, 2020, **85**, 10160-11071.
- [15] C. Tozlu, E. Şahin, H. Serencam, E. Dertli, *Biocatal. Biotransfor.*, 2019, **37**, 388 - 398.
- [16] W. -P. Liu, M. -L. Y, X. -H. Yang, K. Li, J. -H. Xie, Q. -L. Zhou, *Chem. Commun.*, 2015, **51**, 6123-6125.
- [17] S. A. Moteki, J. M. Takacs, *Angew. Chem. Int. Ed.*, 2008, **47**, 894-897.



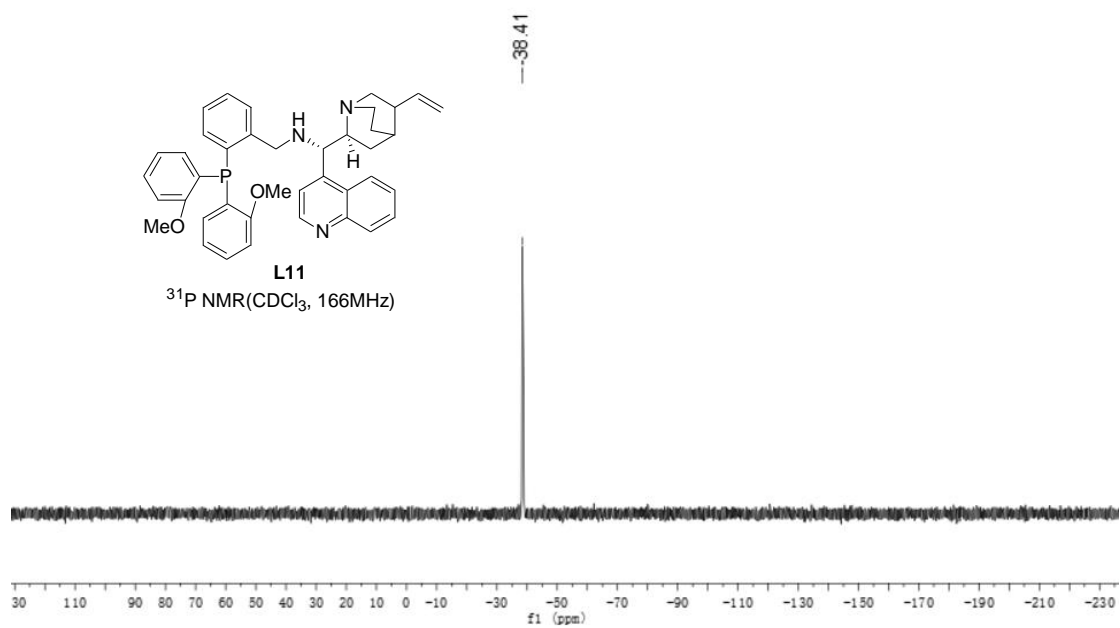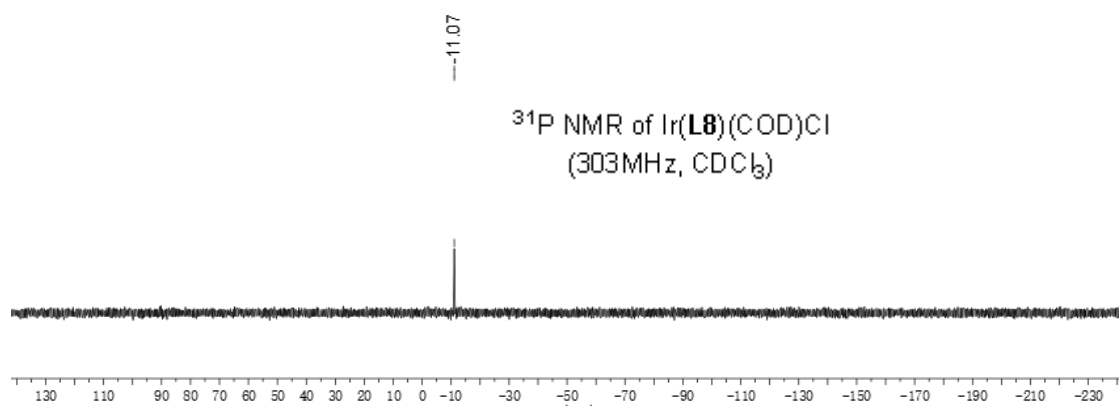

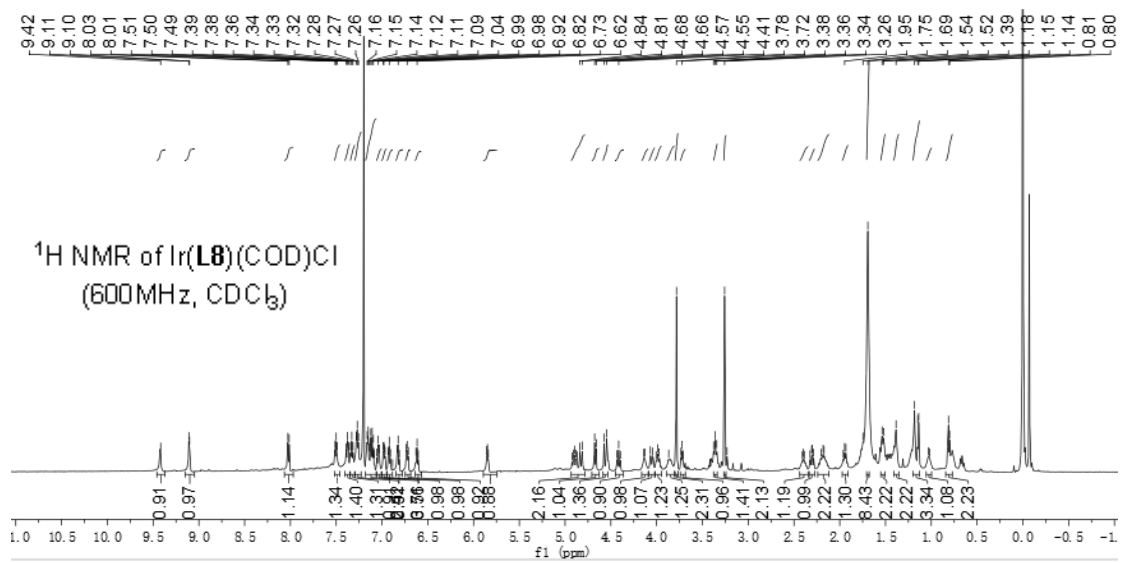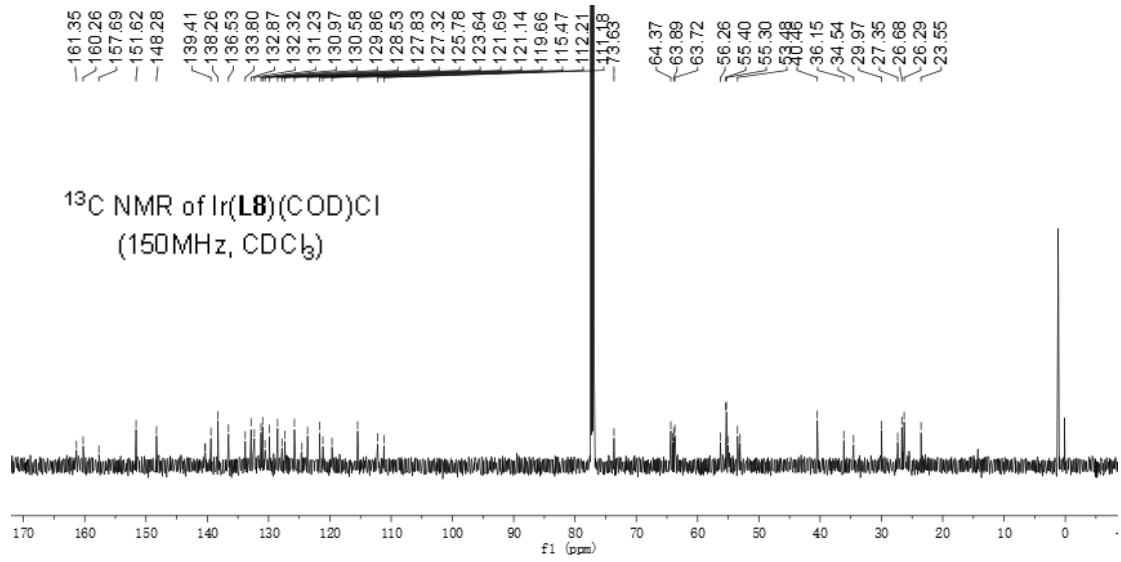

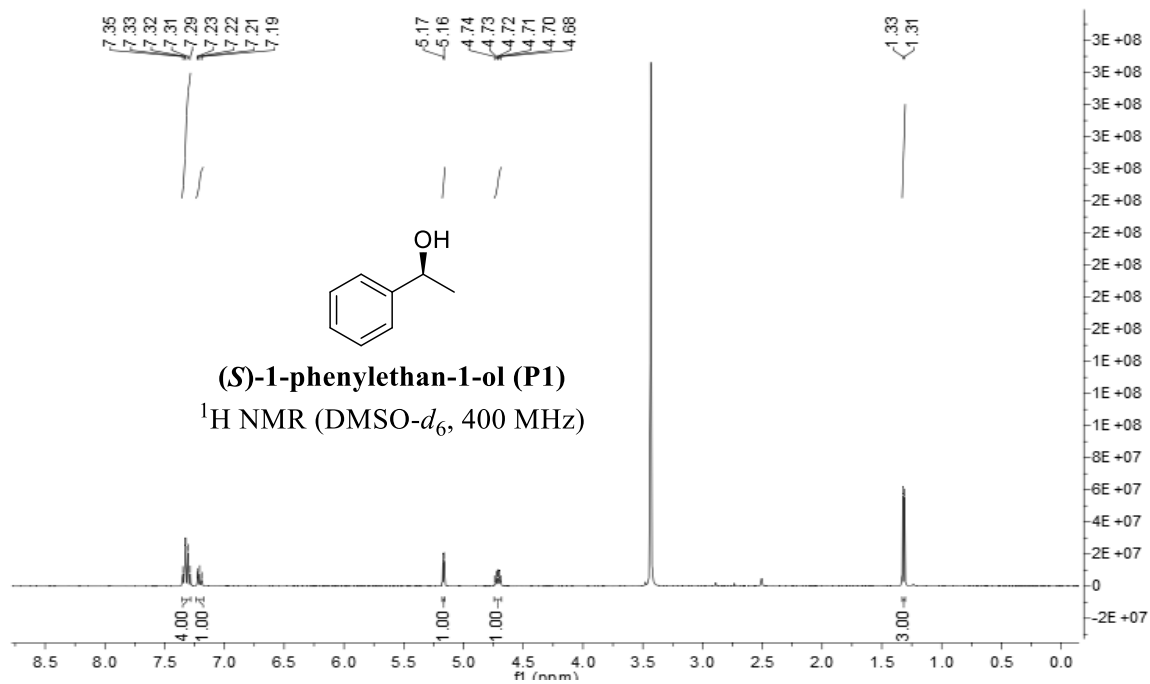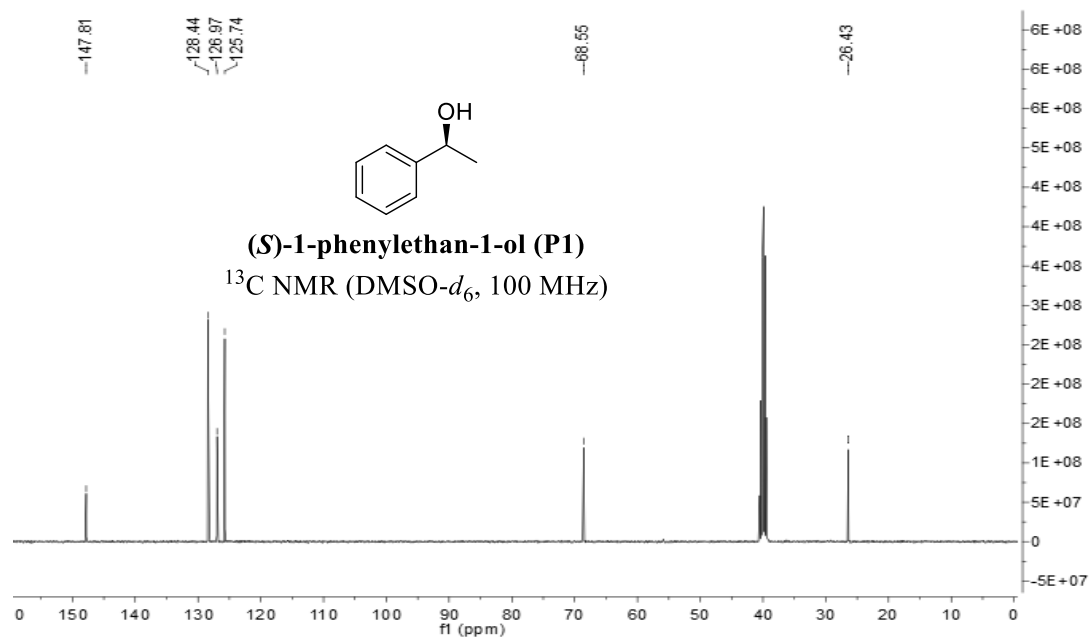

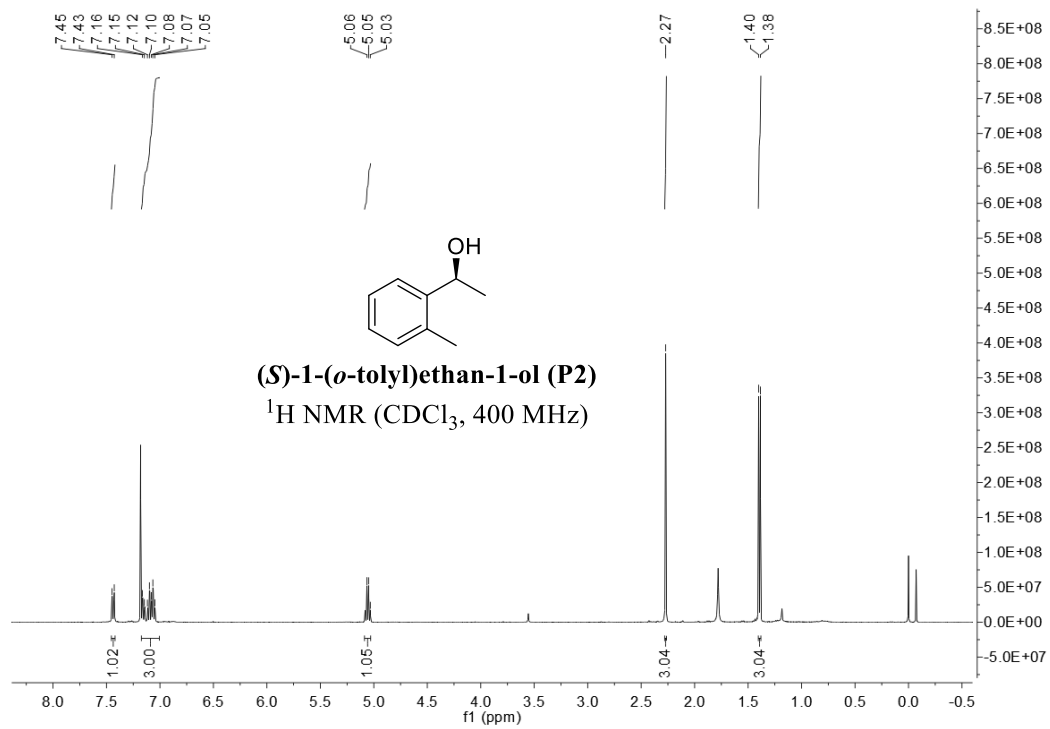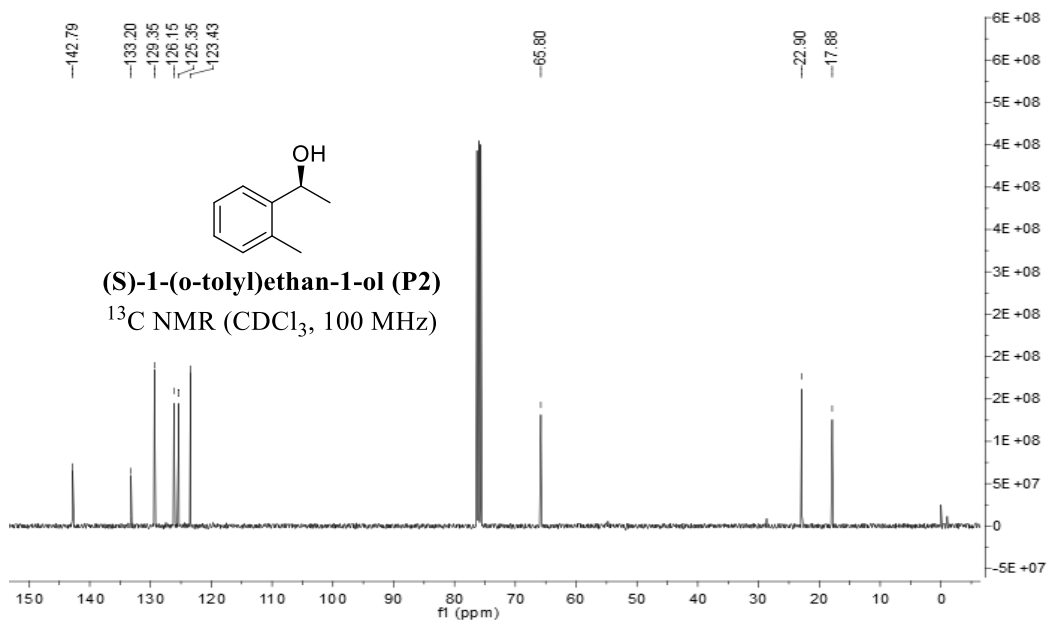

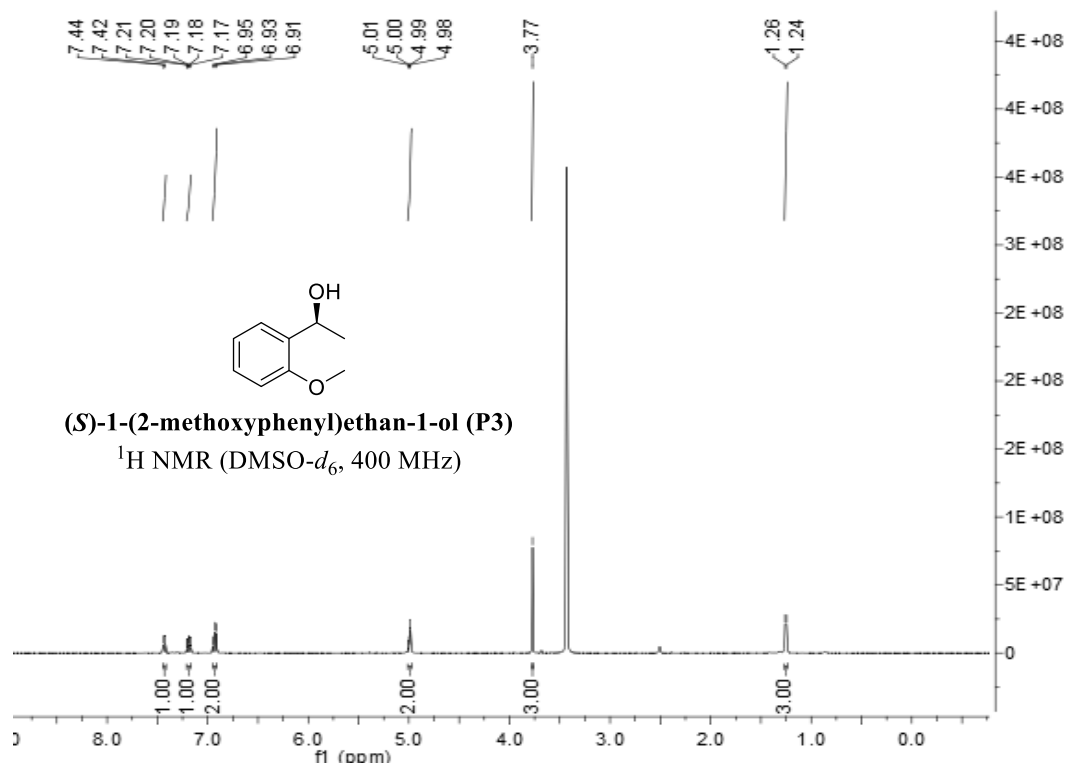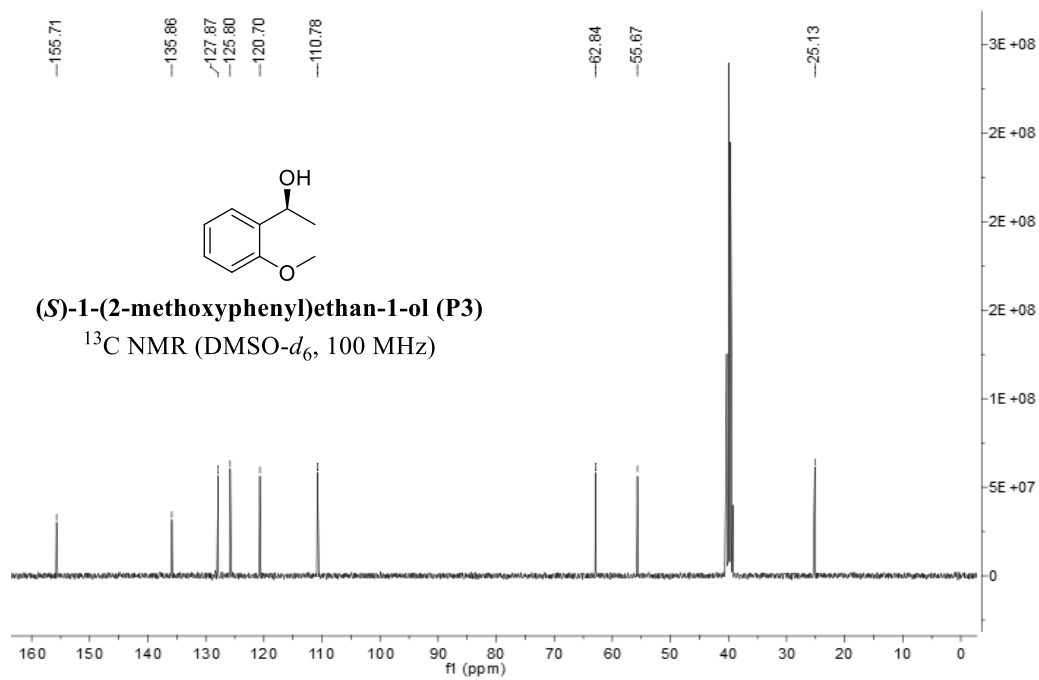



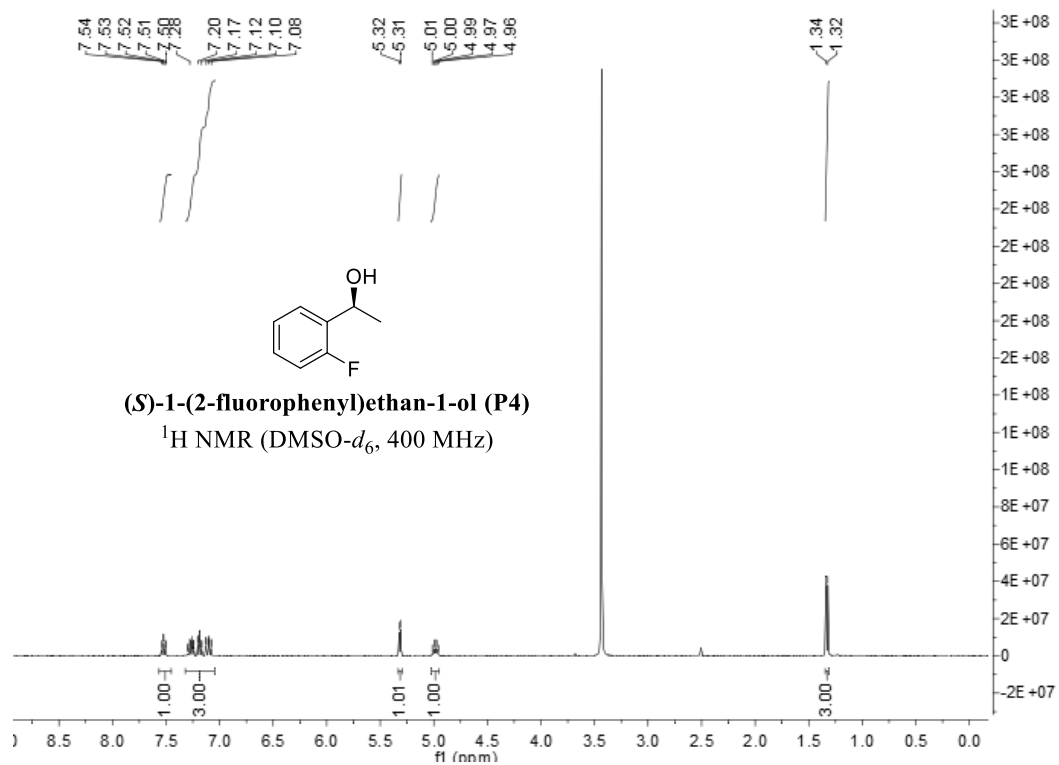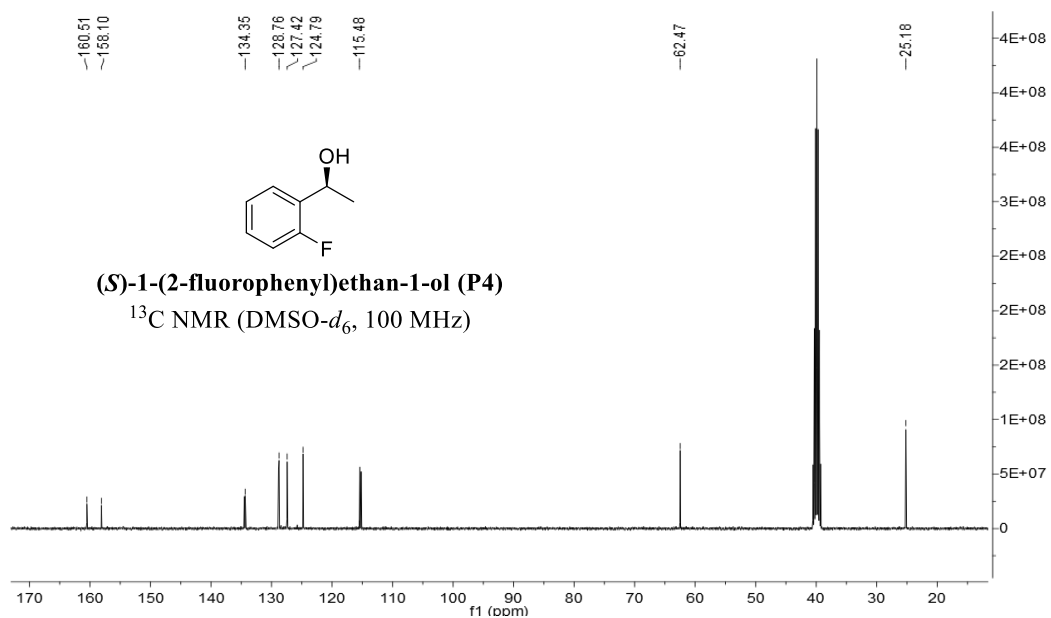

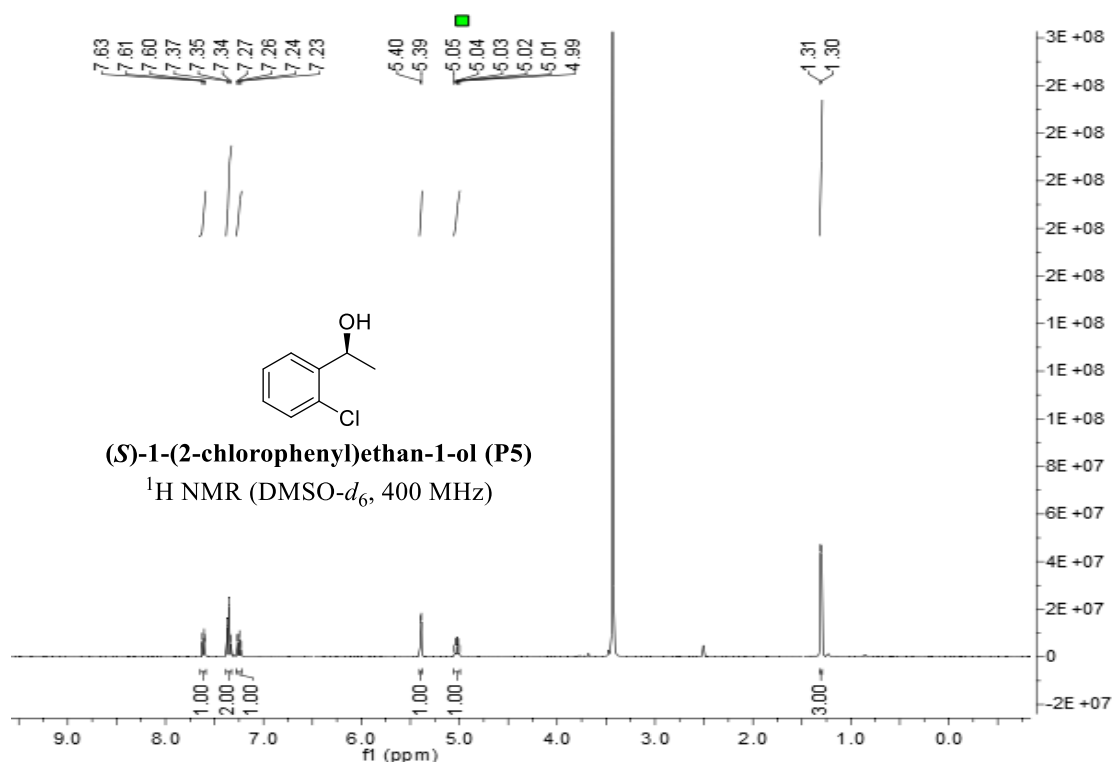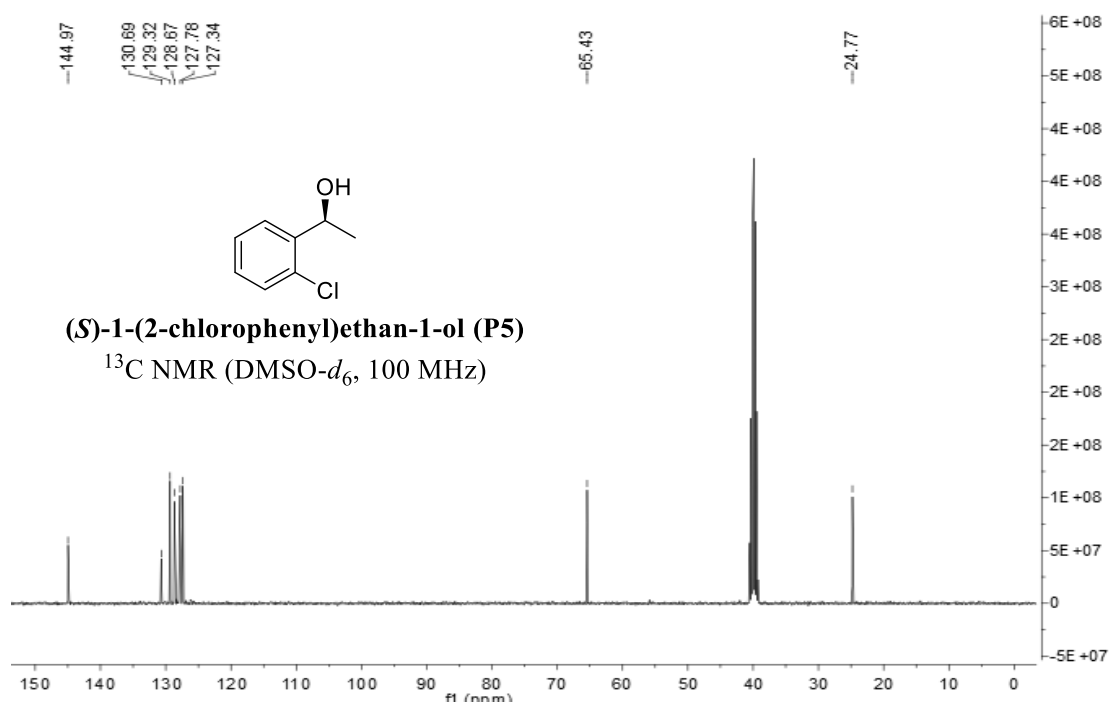

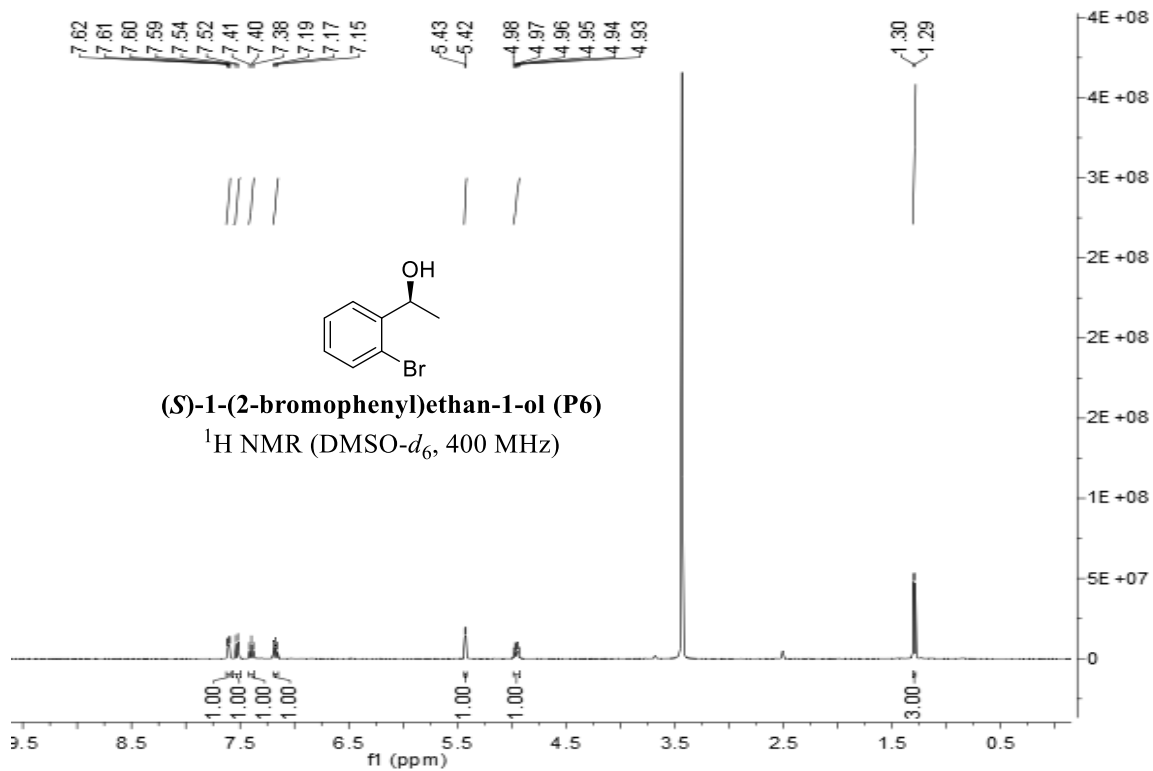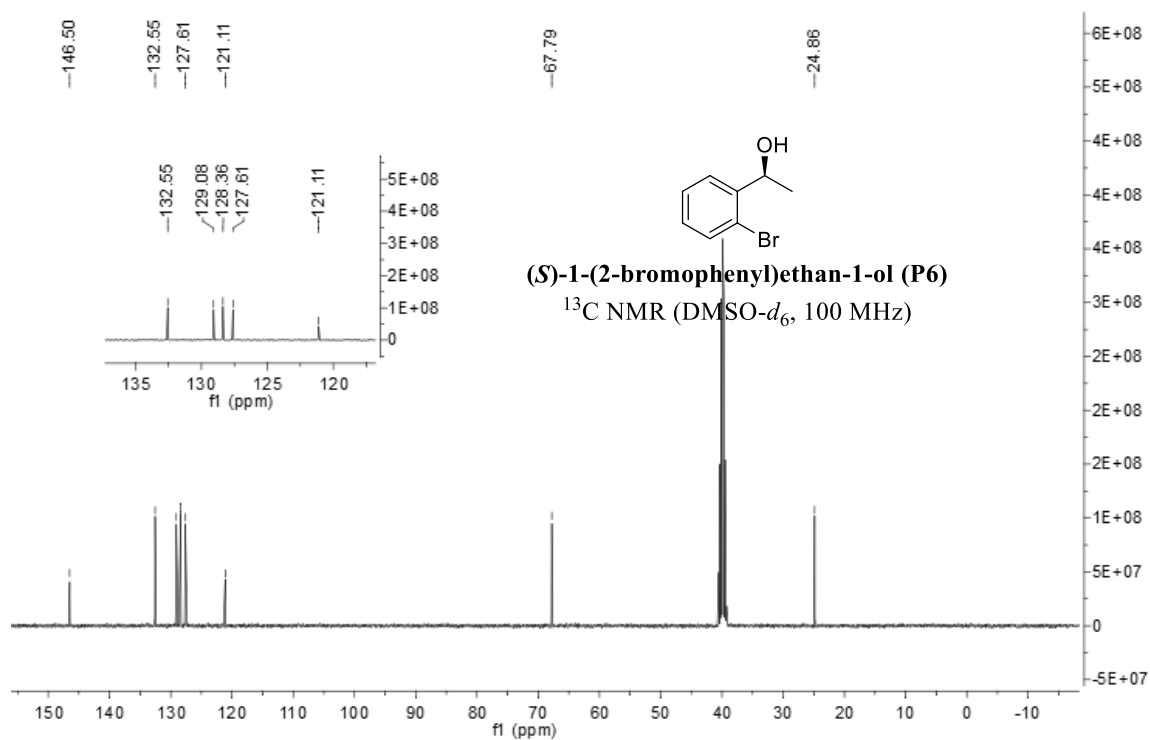

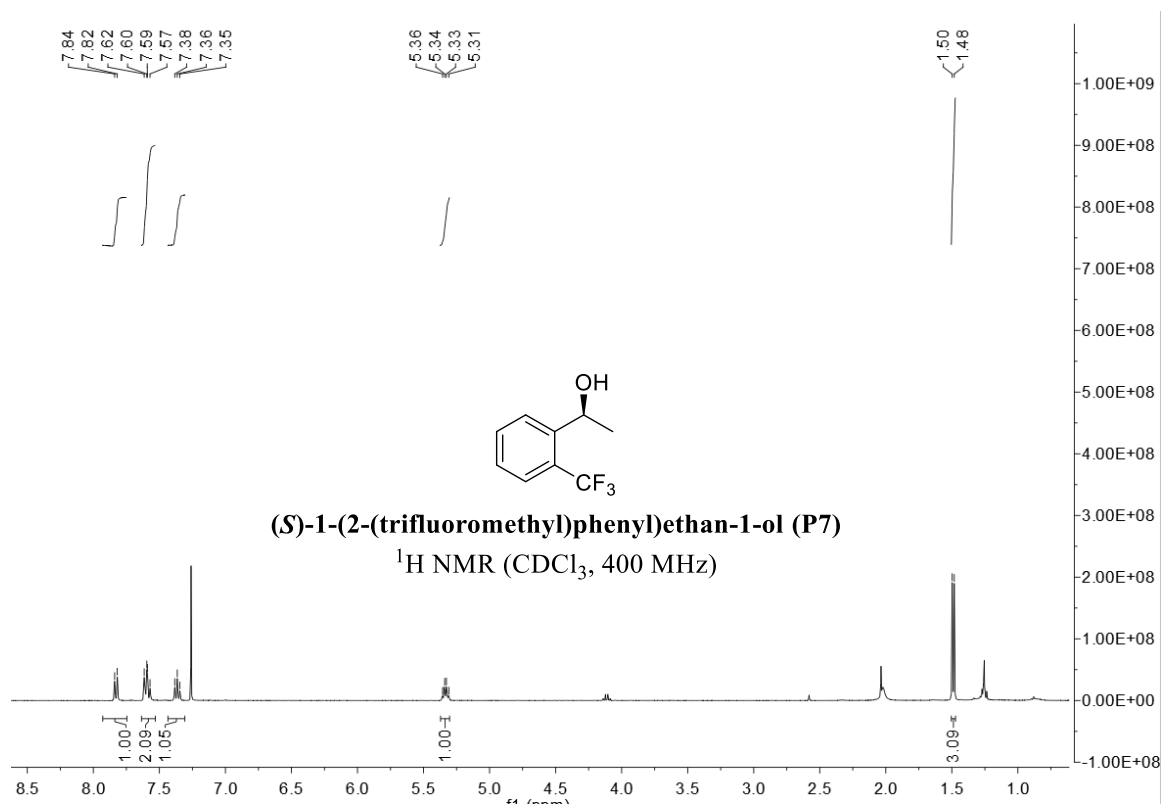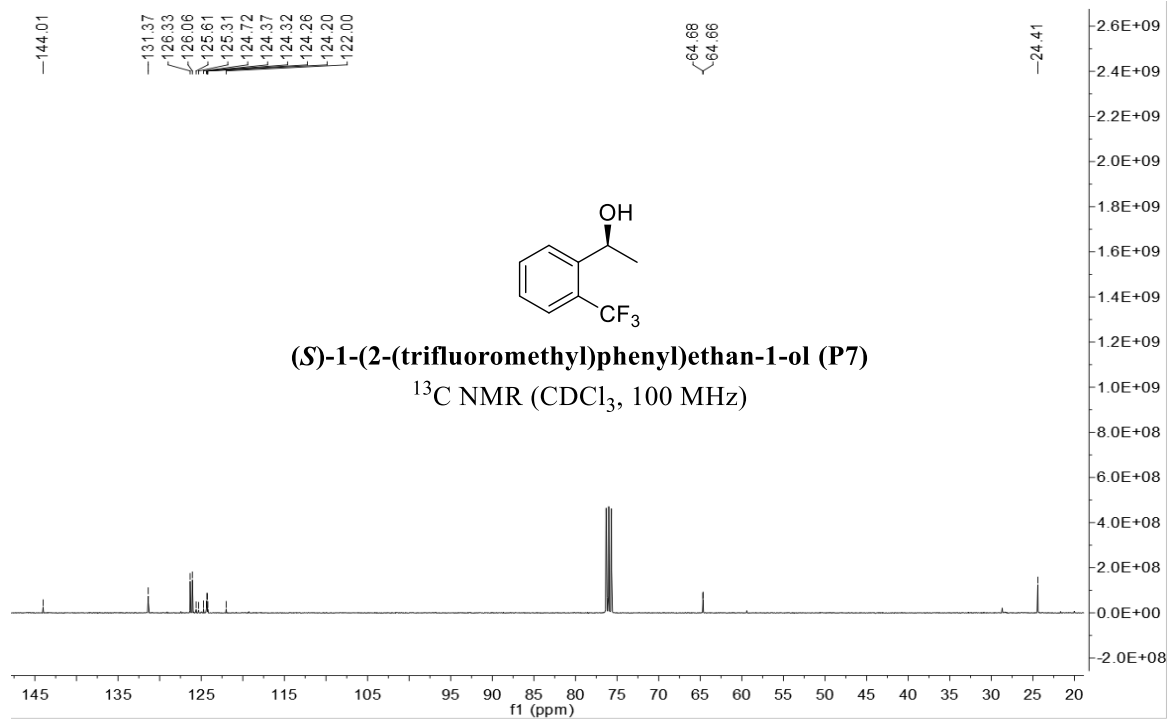

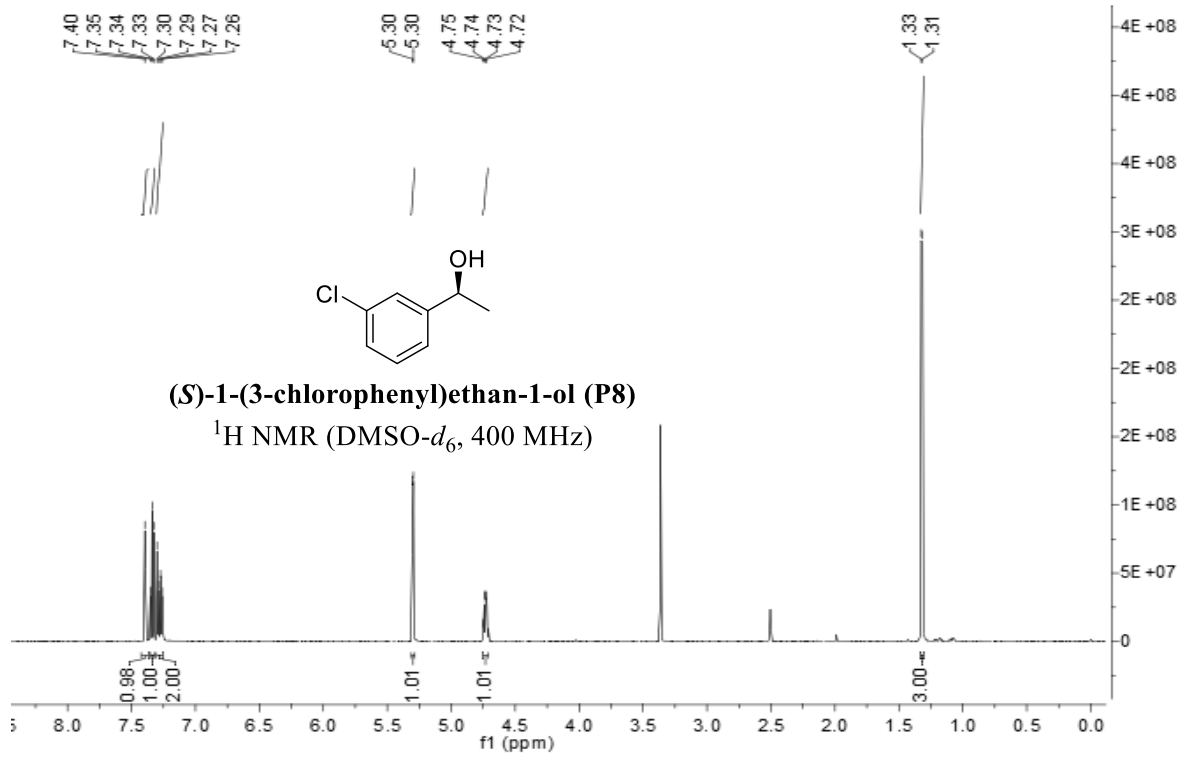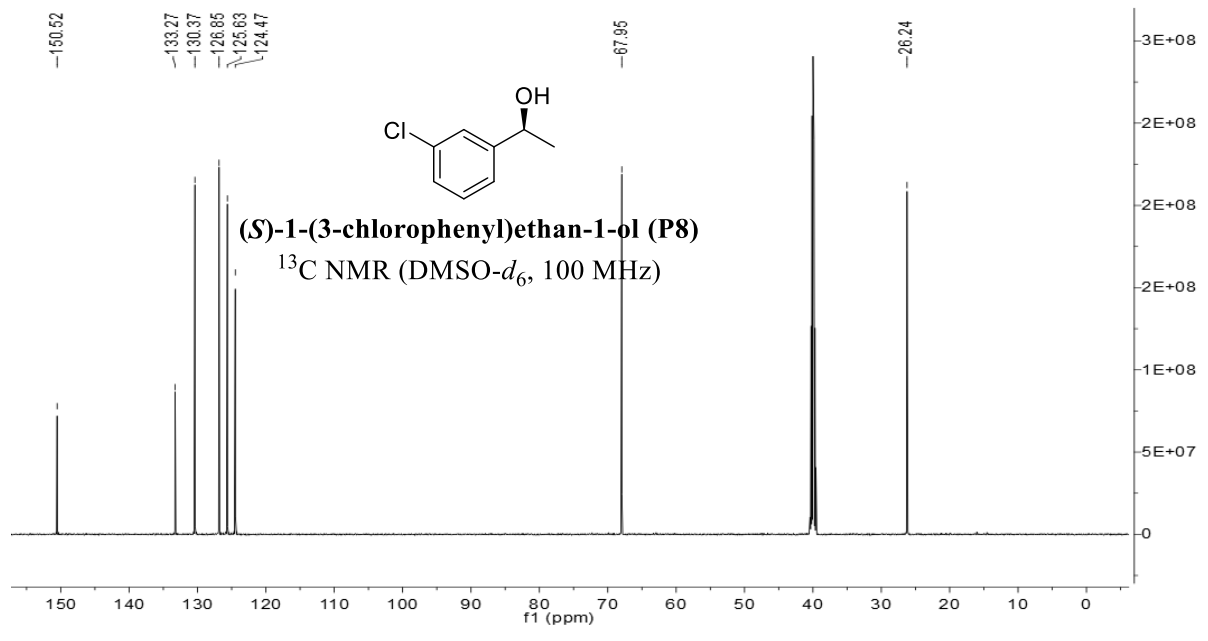

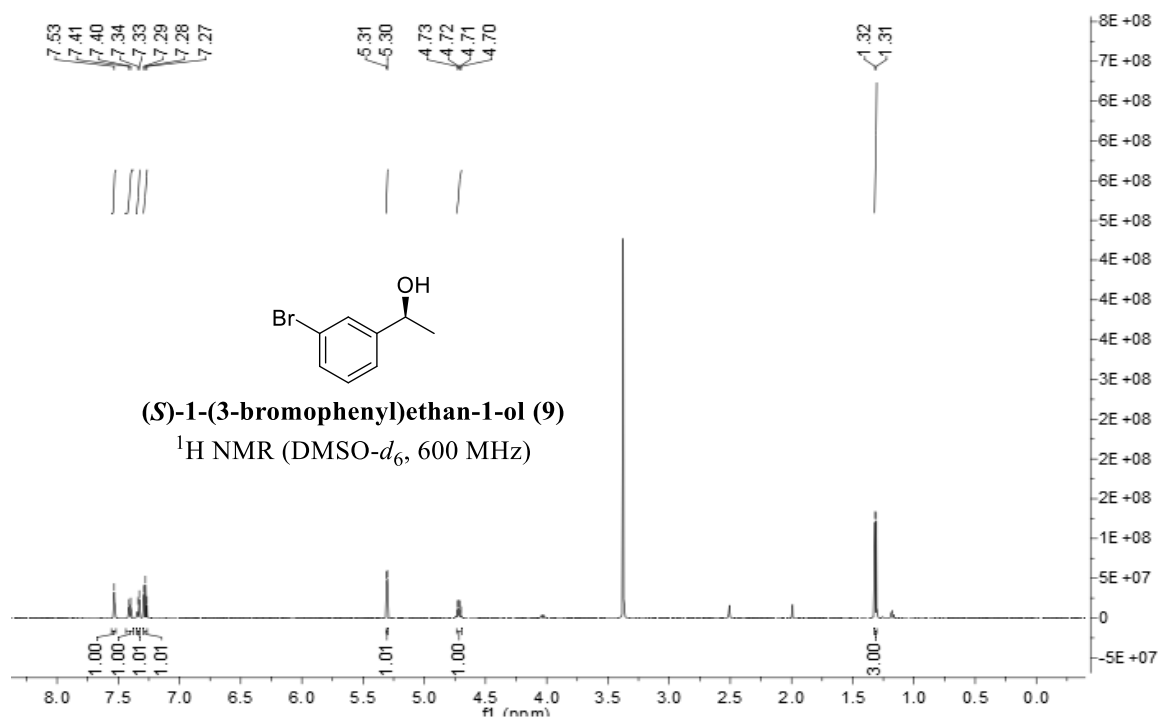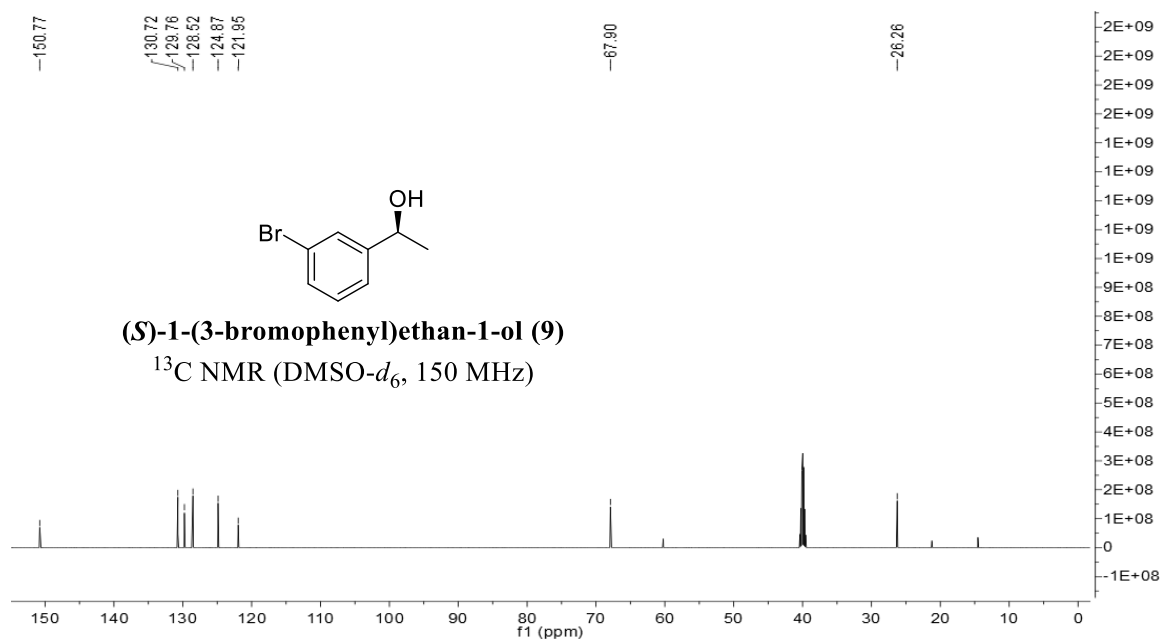

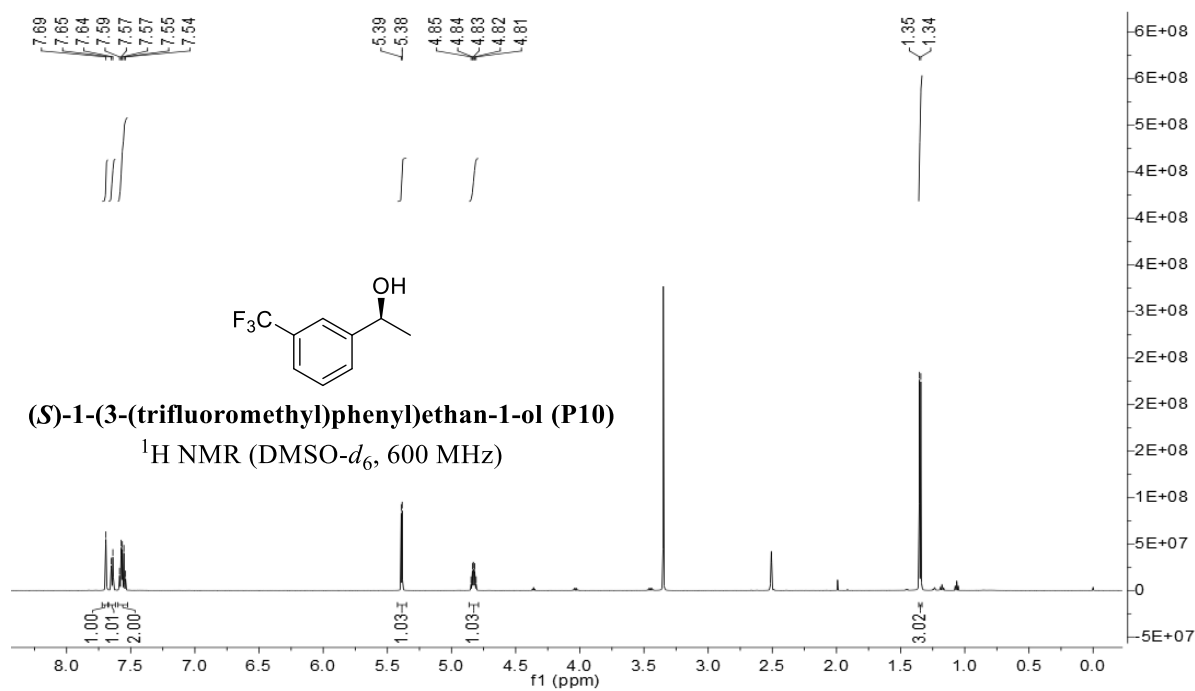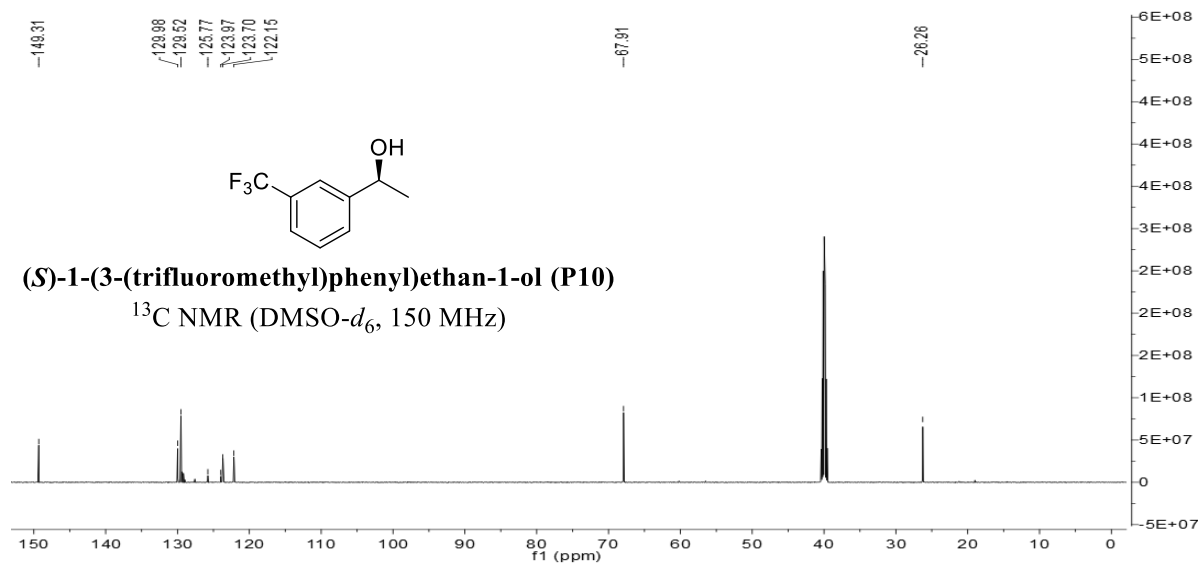

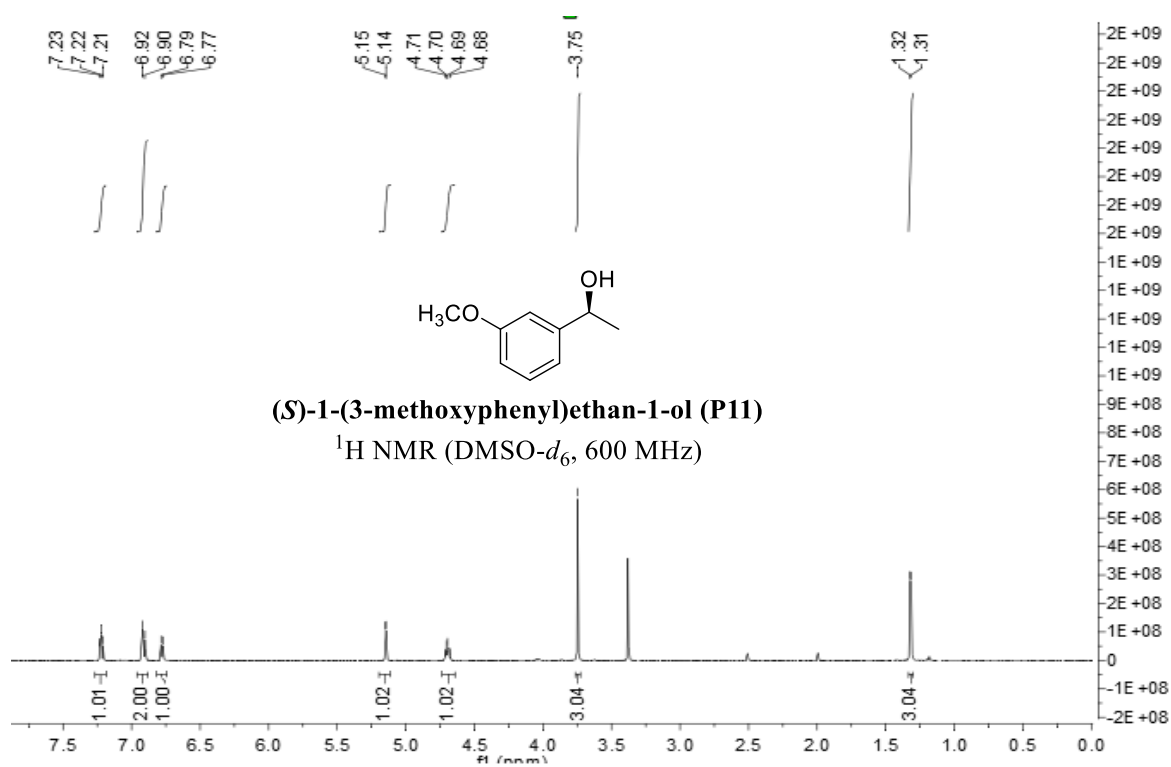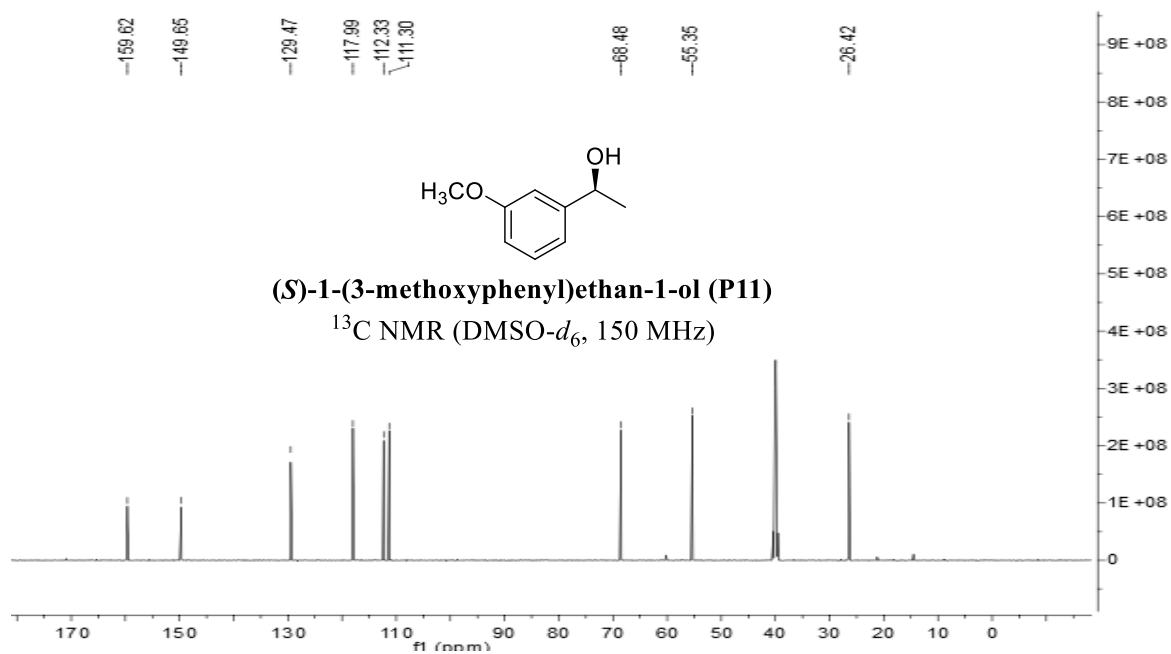



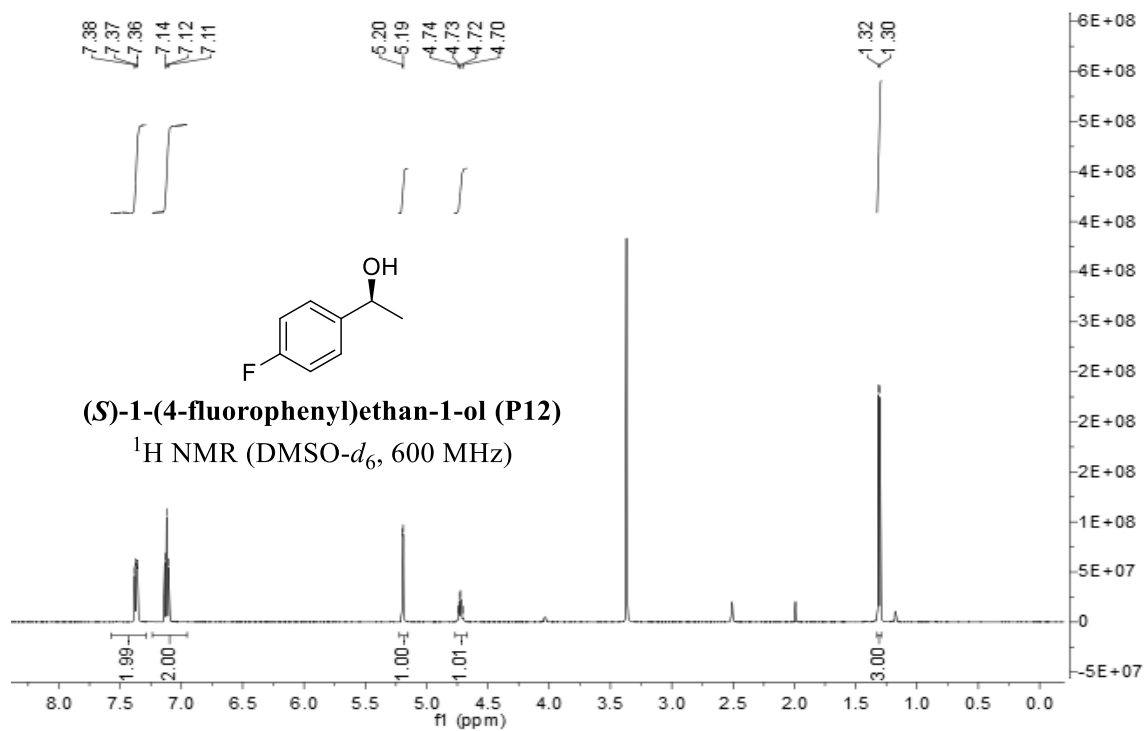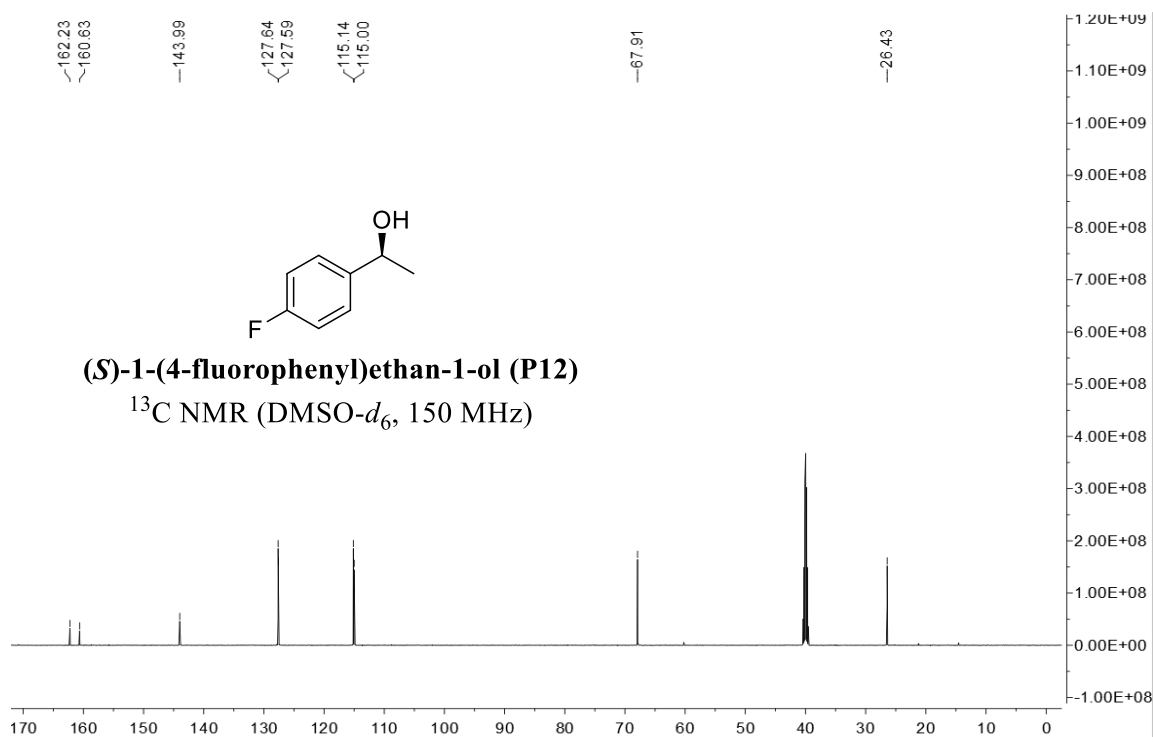

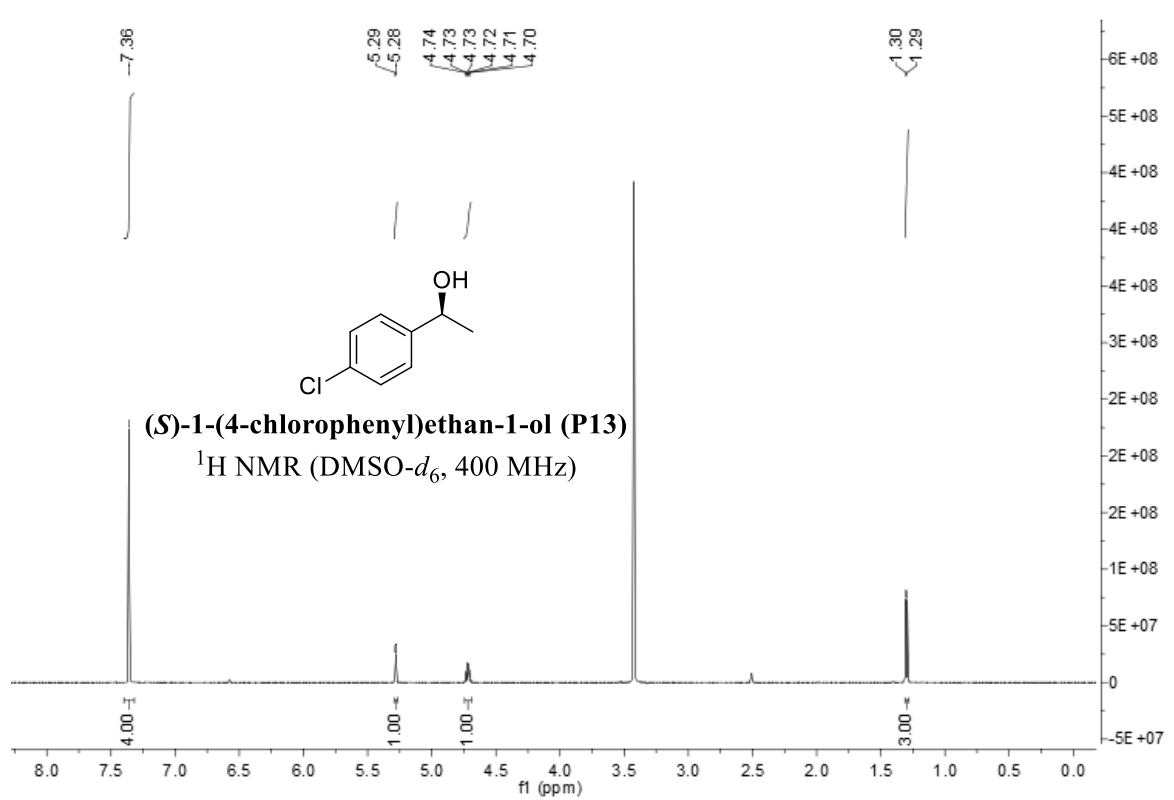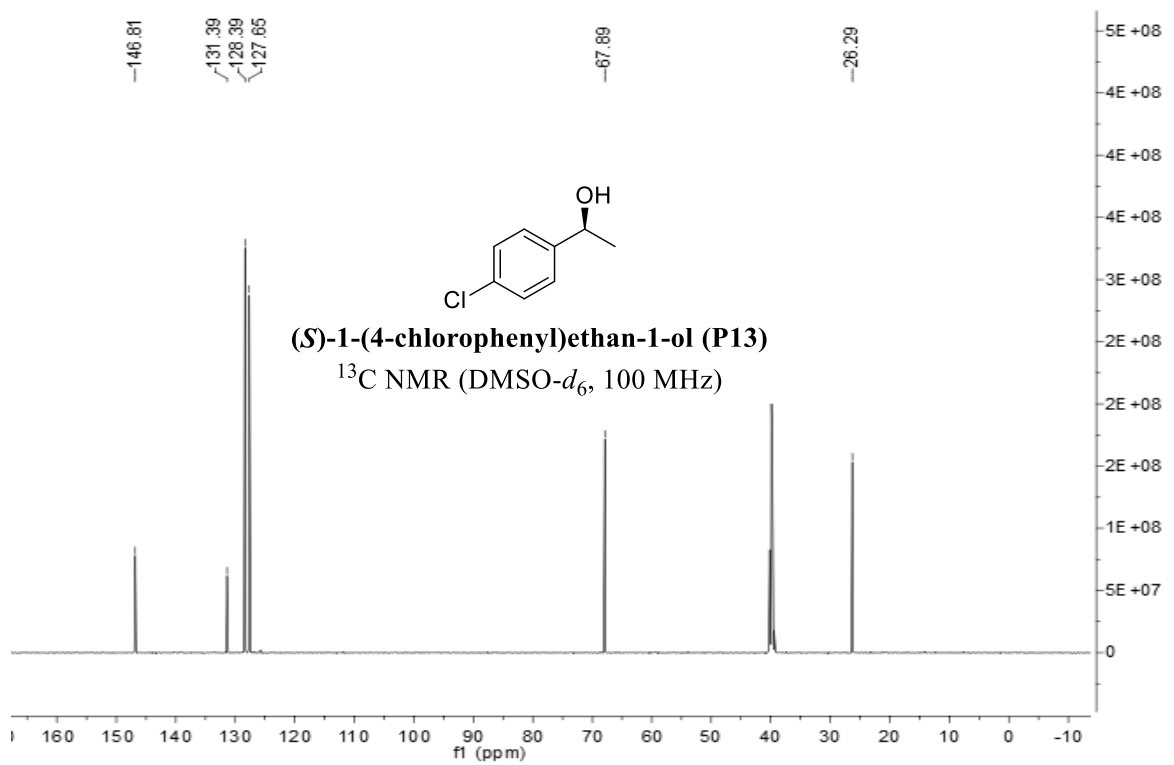

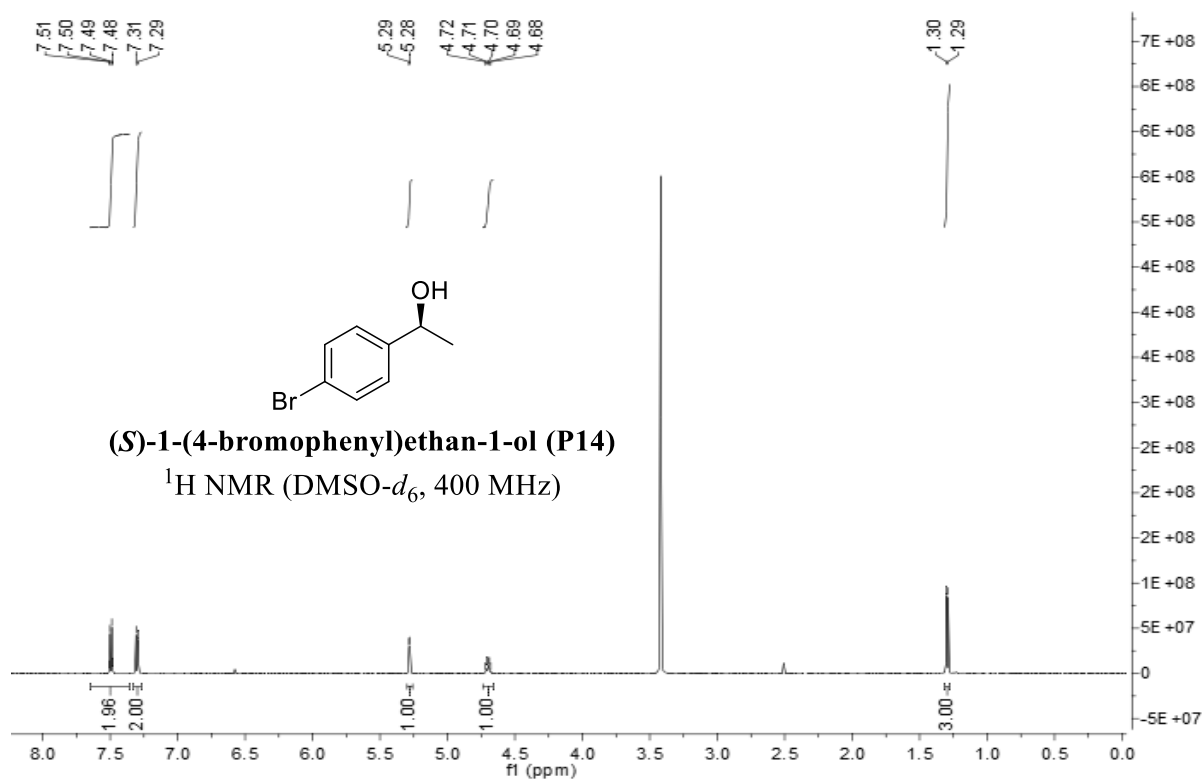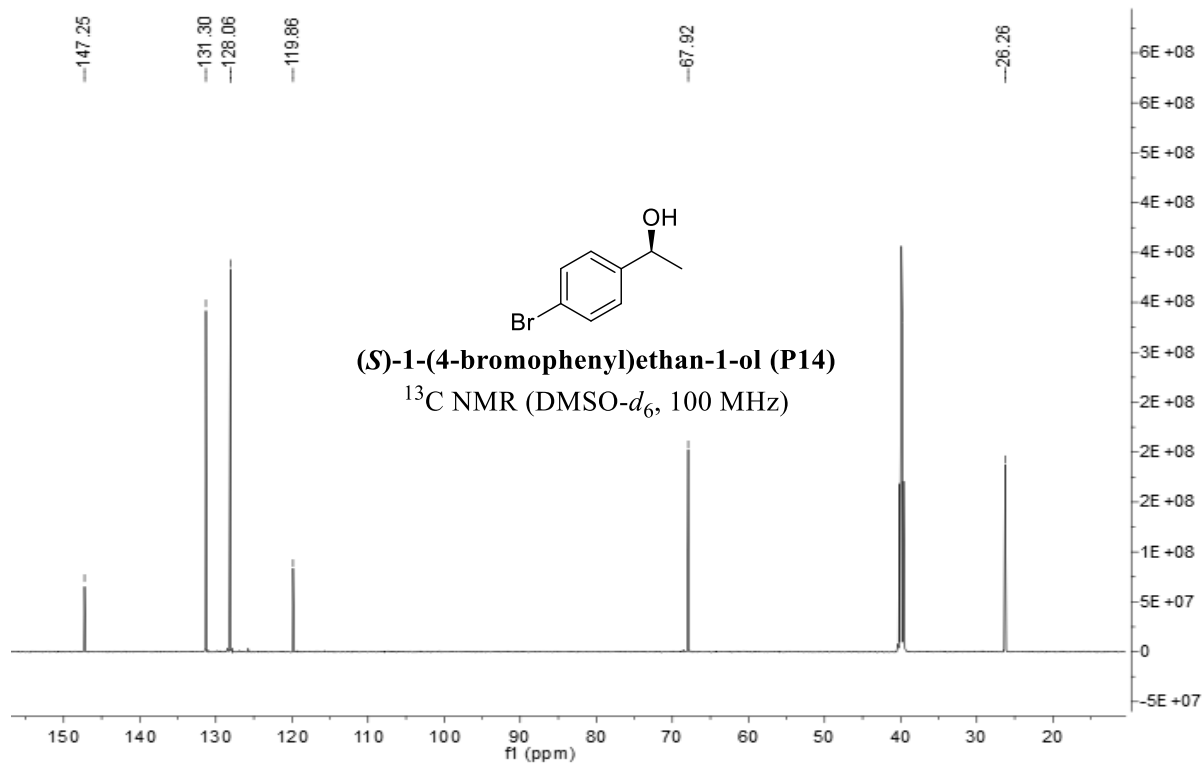

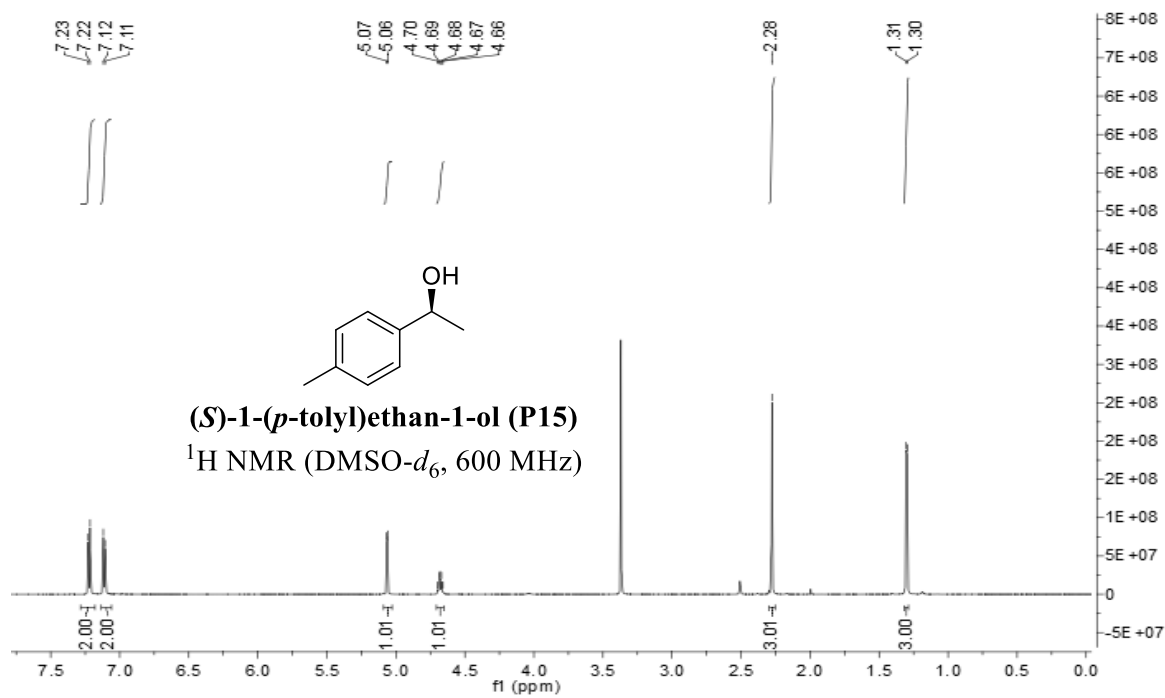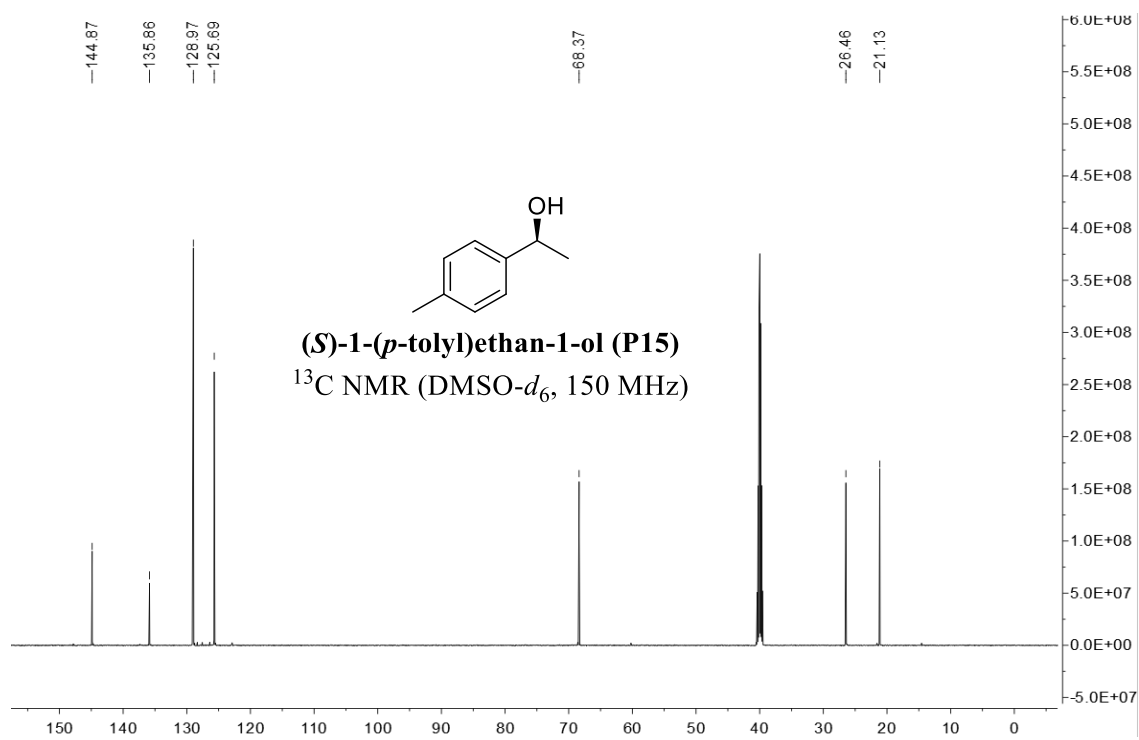

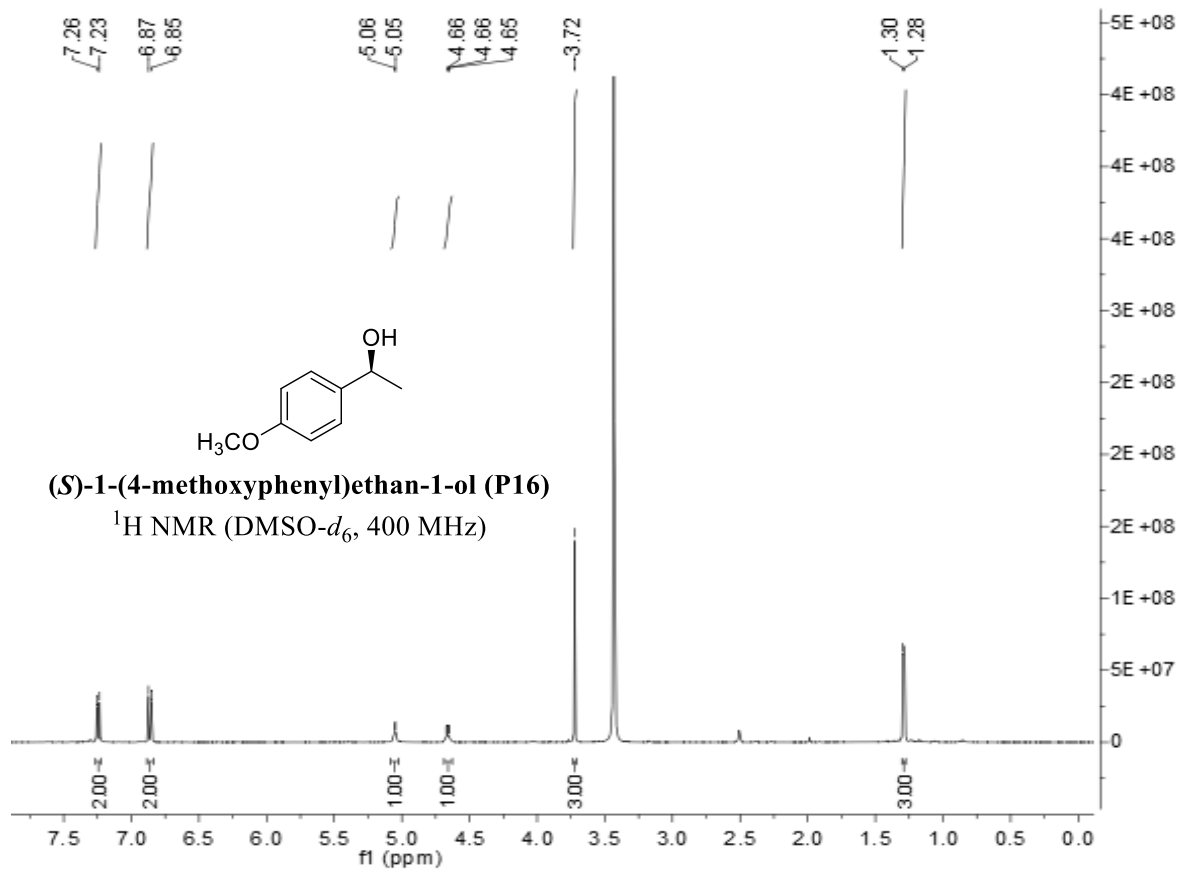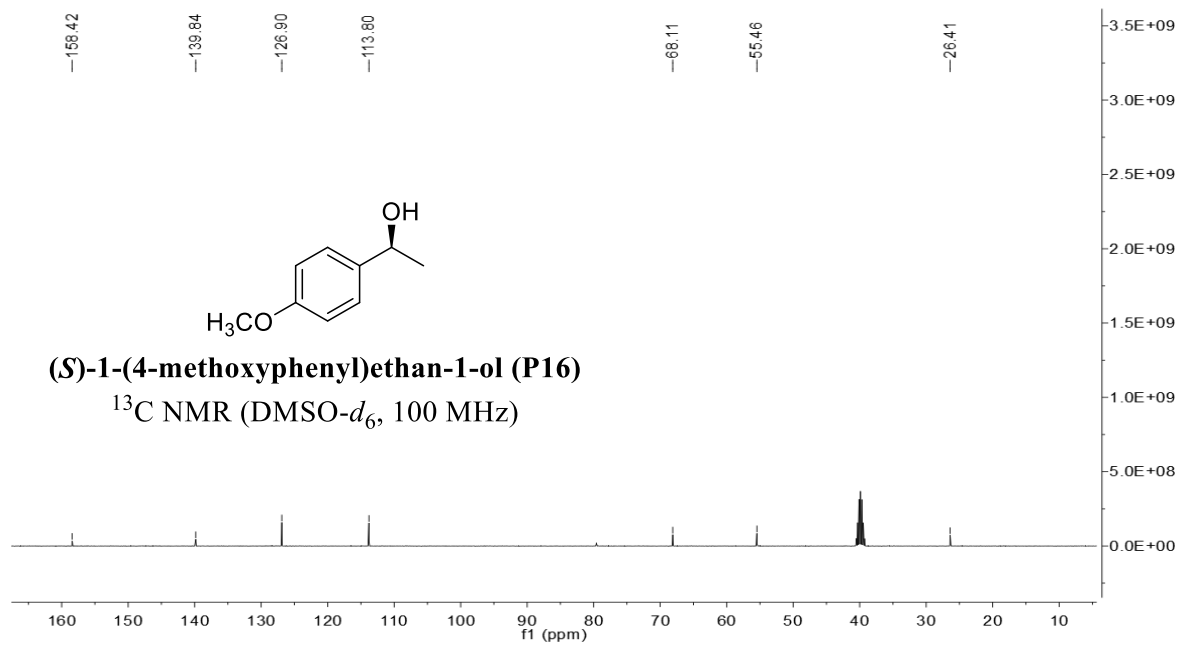

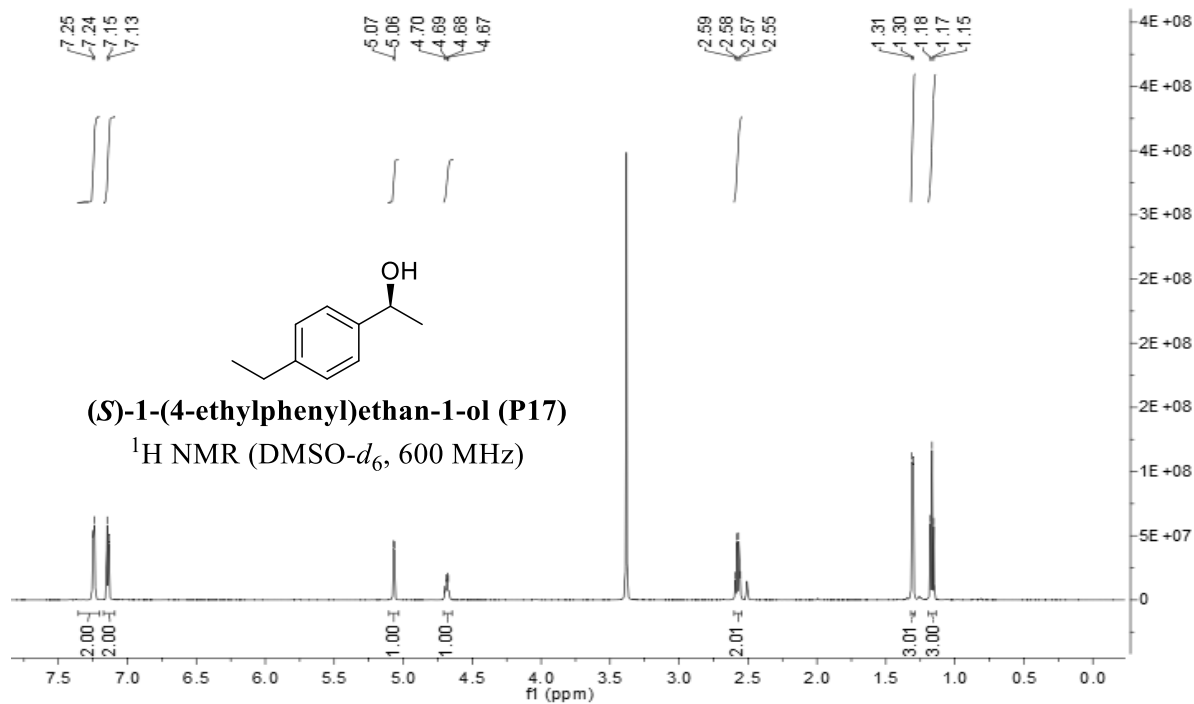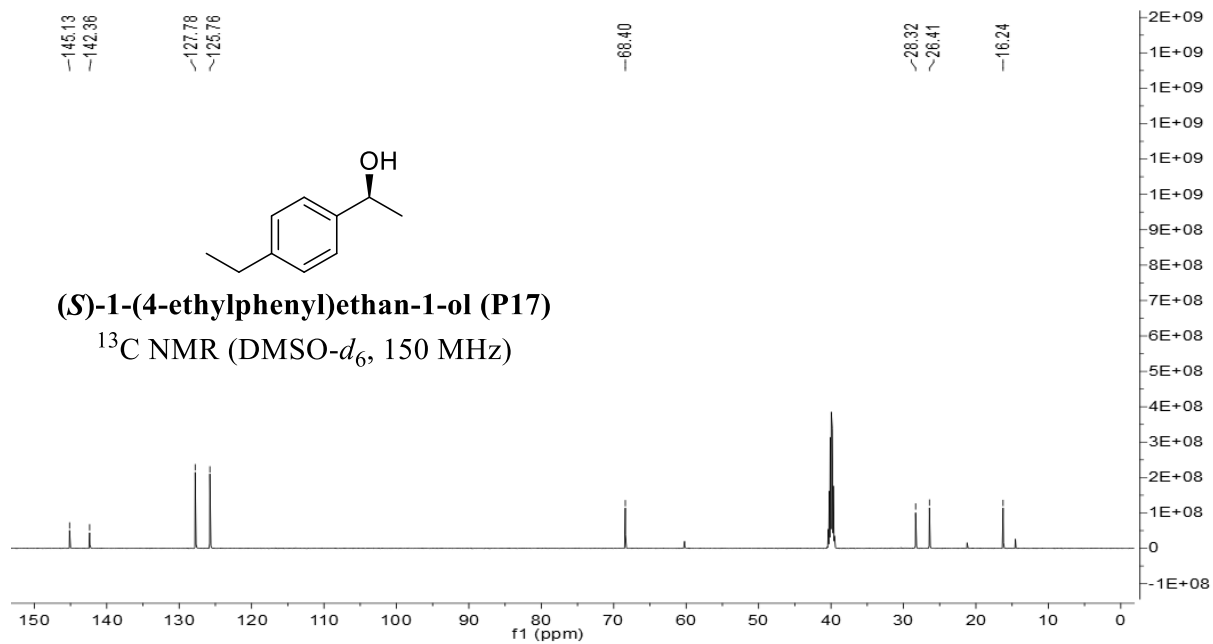

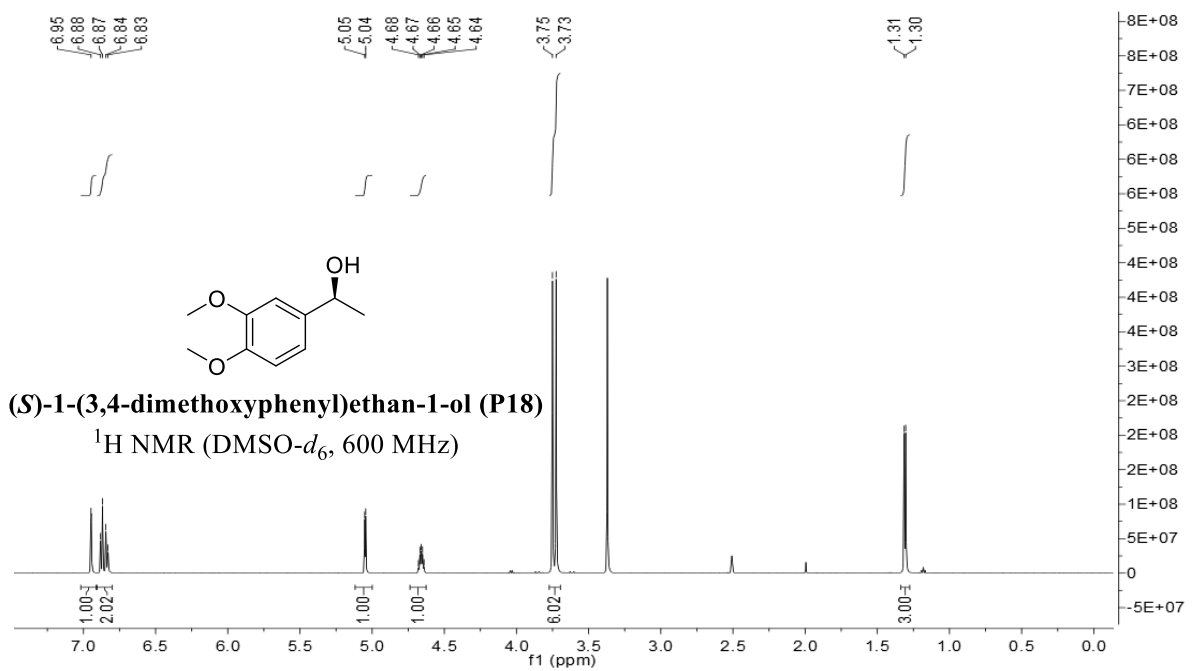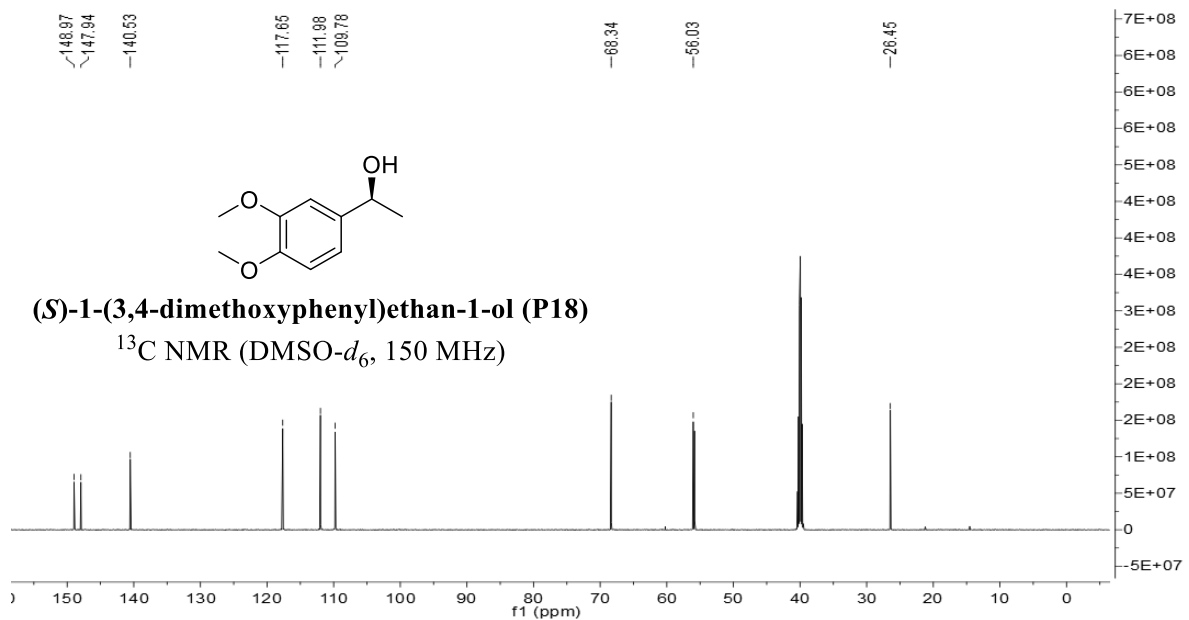

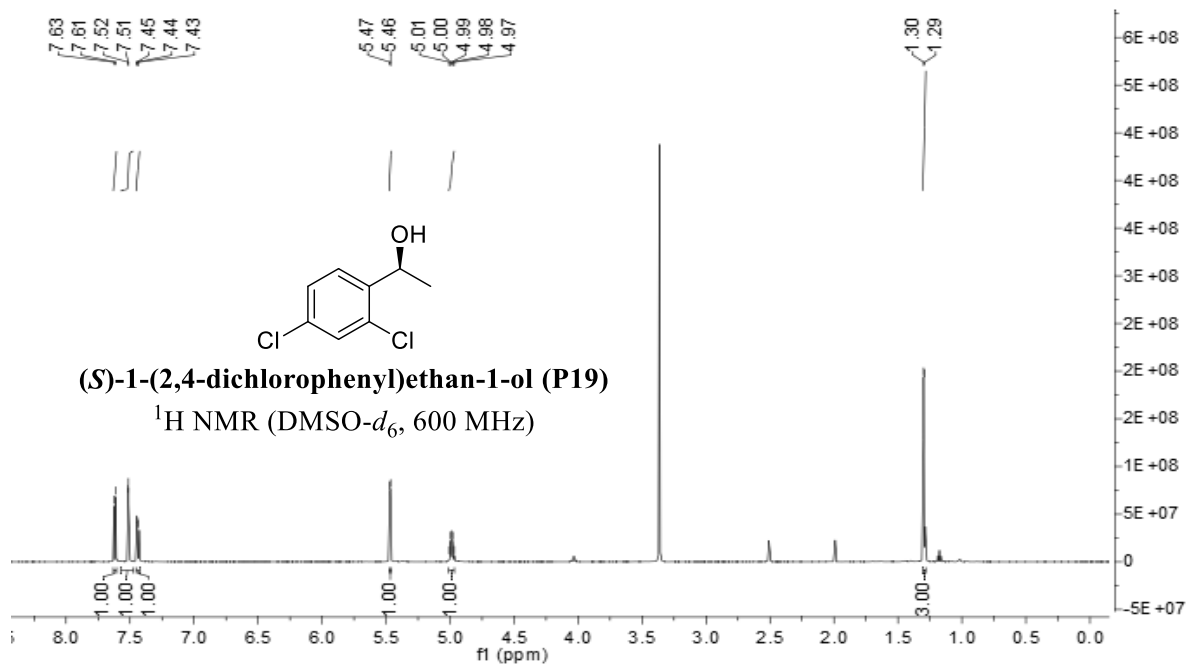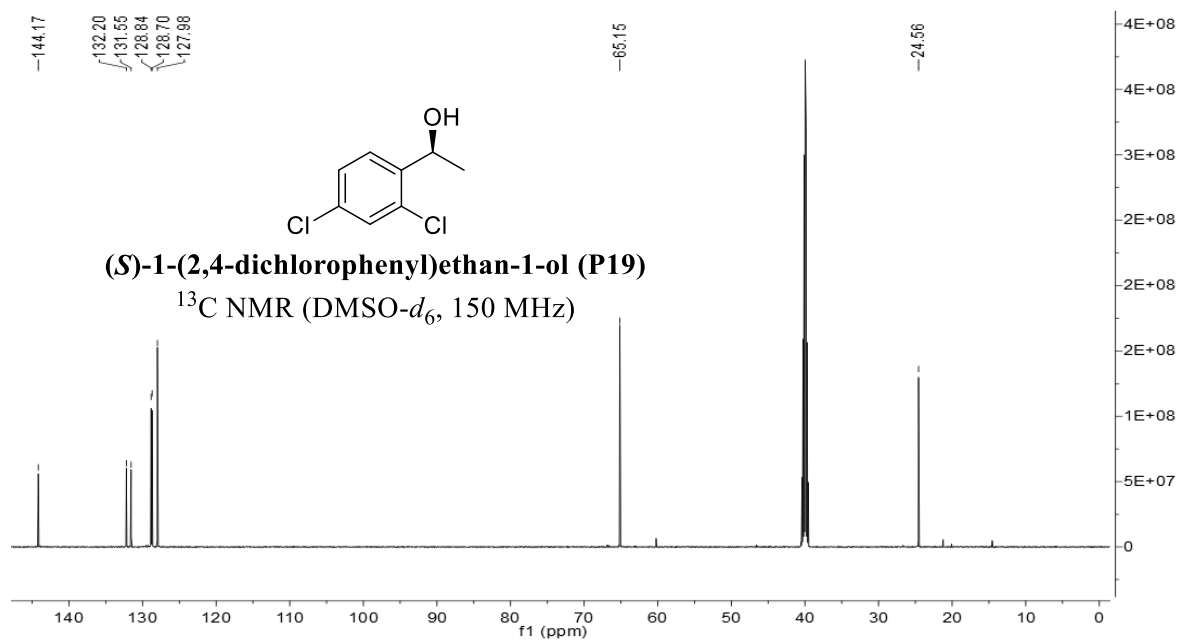



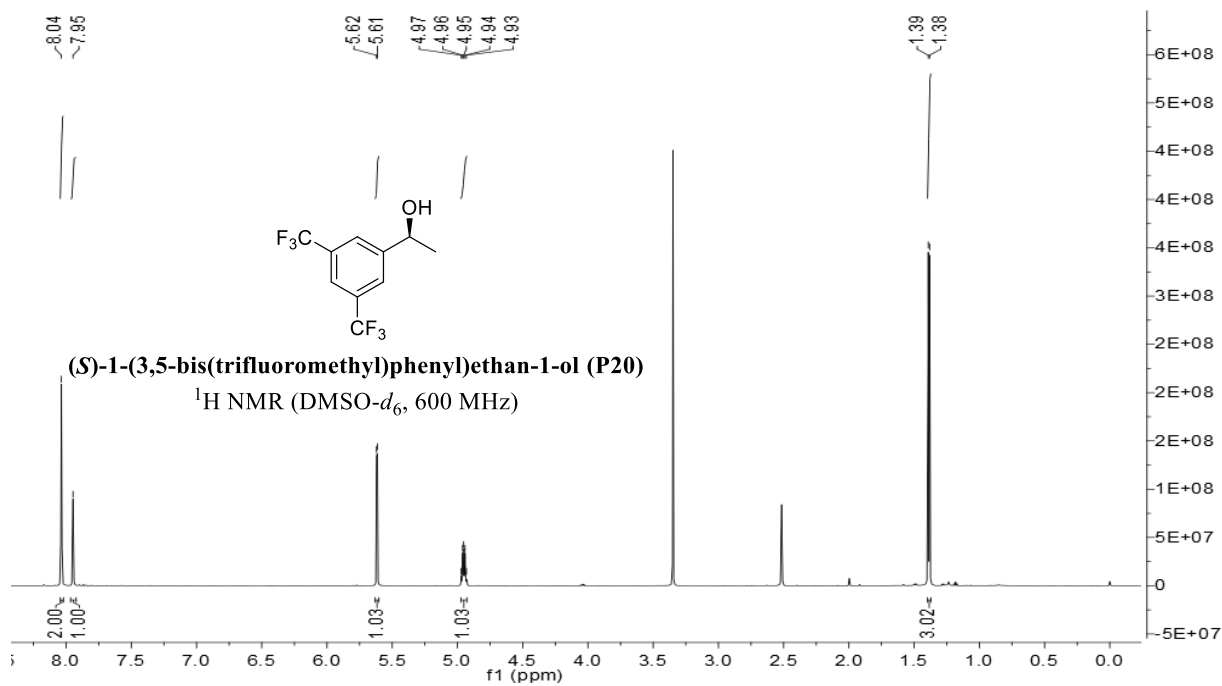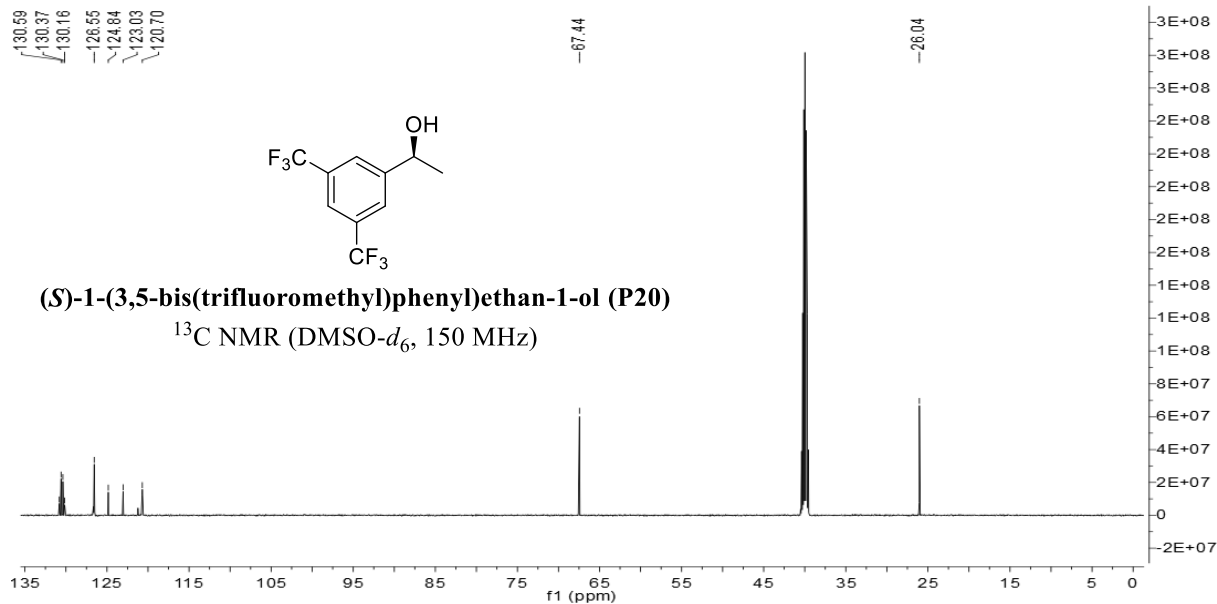

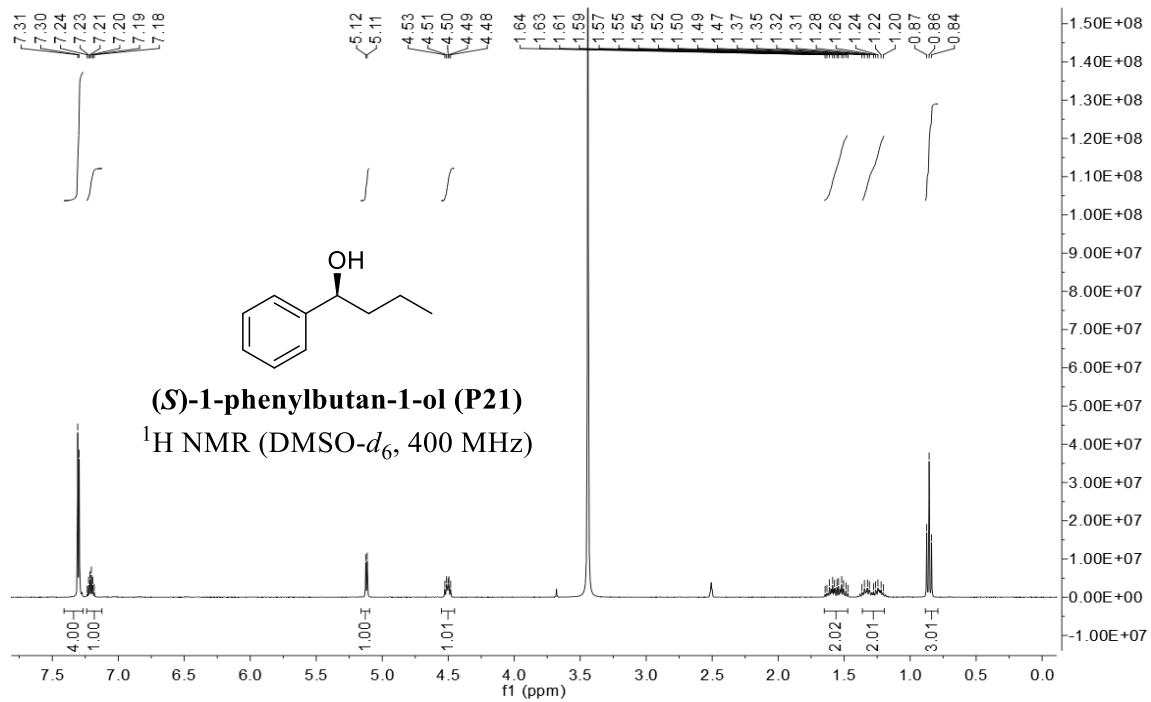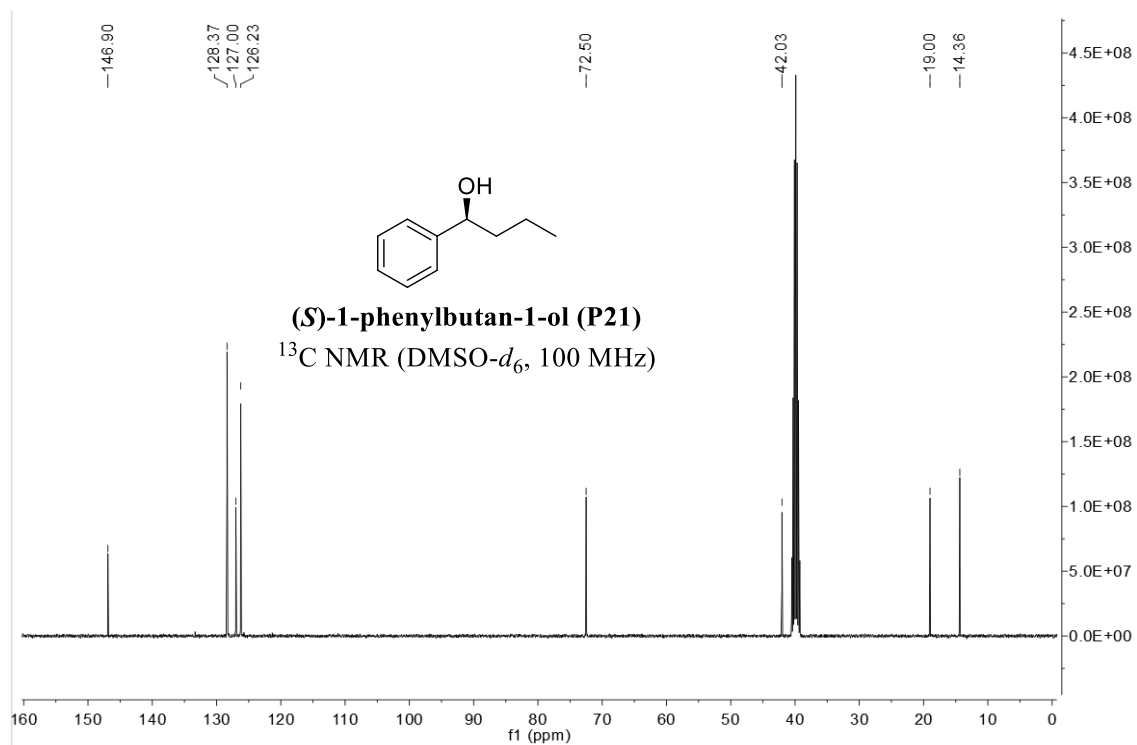

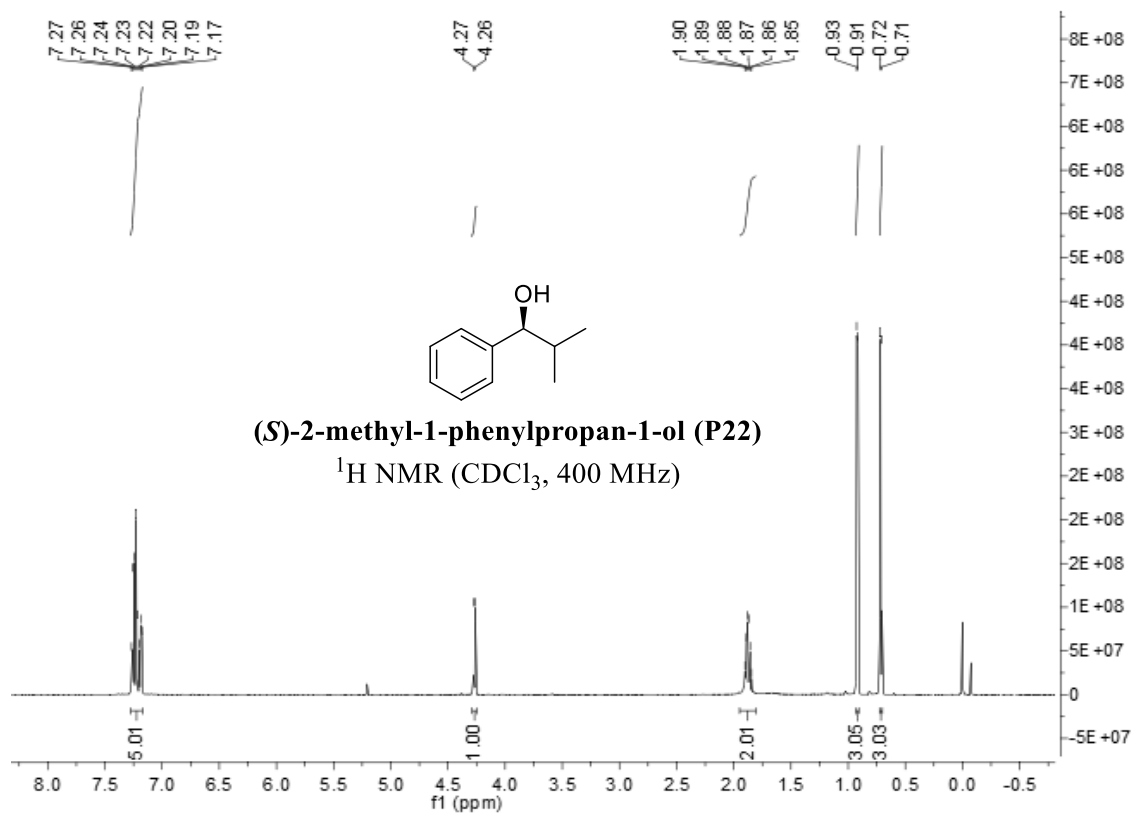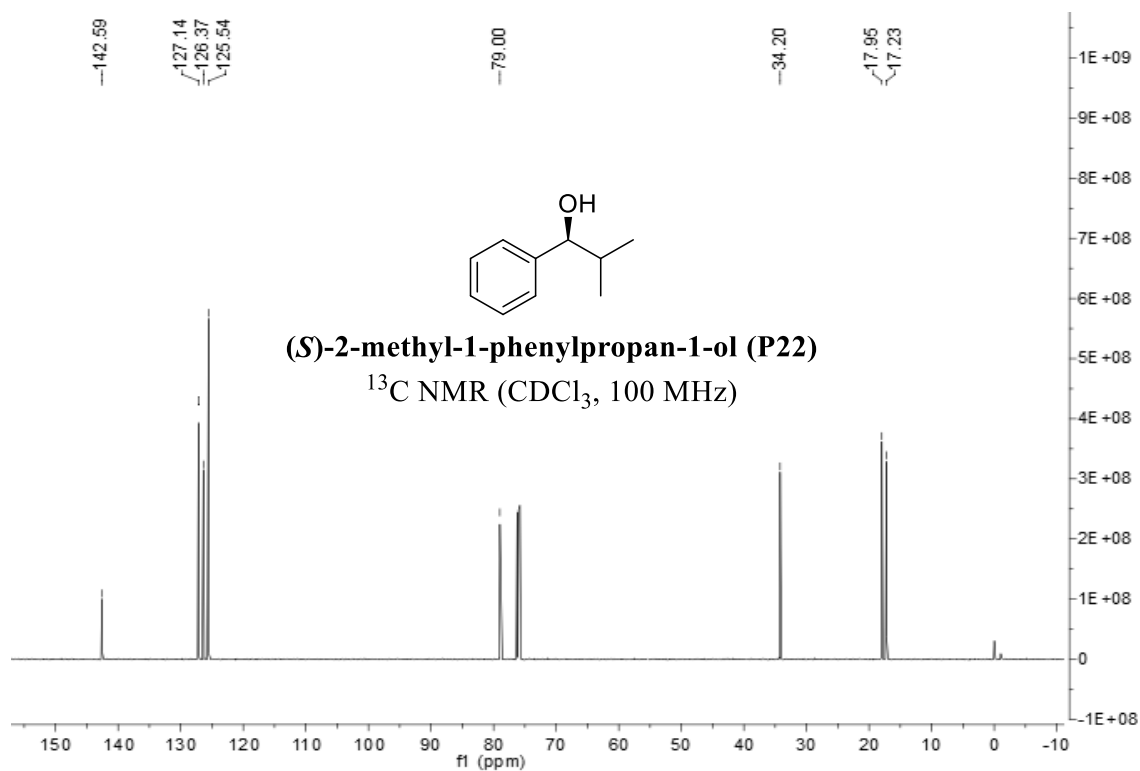

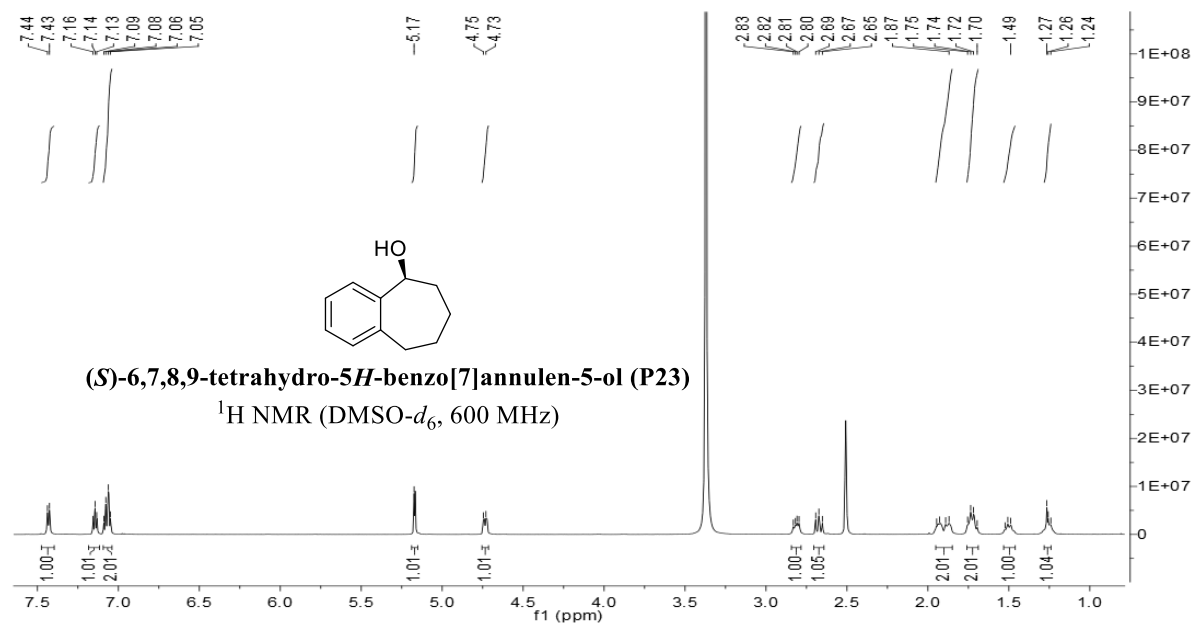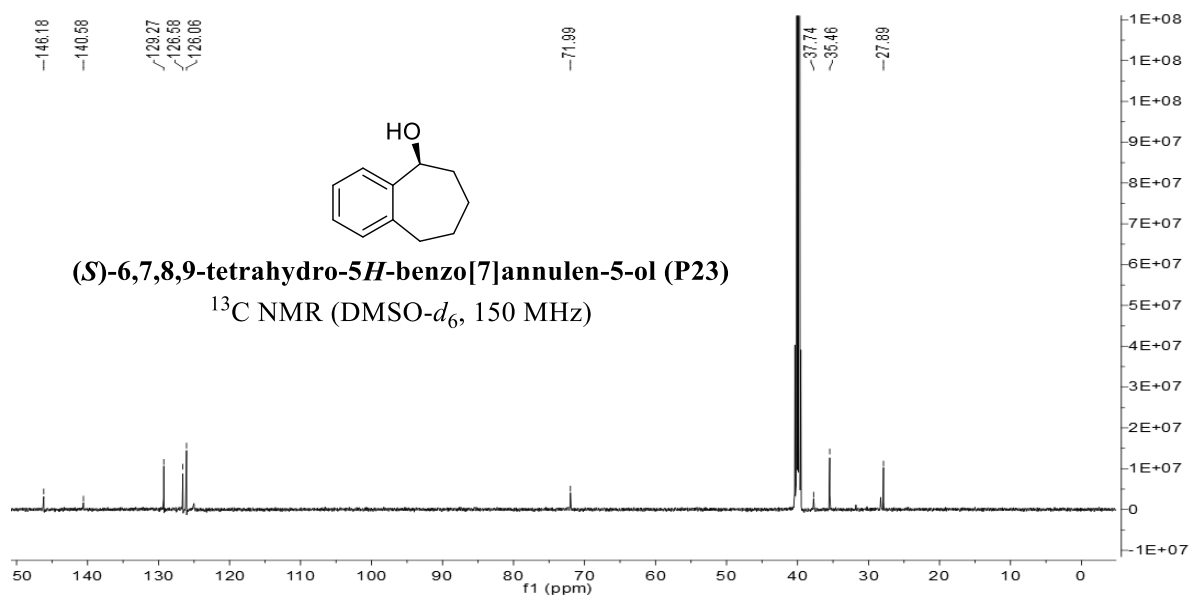

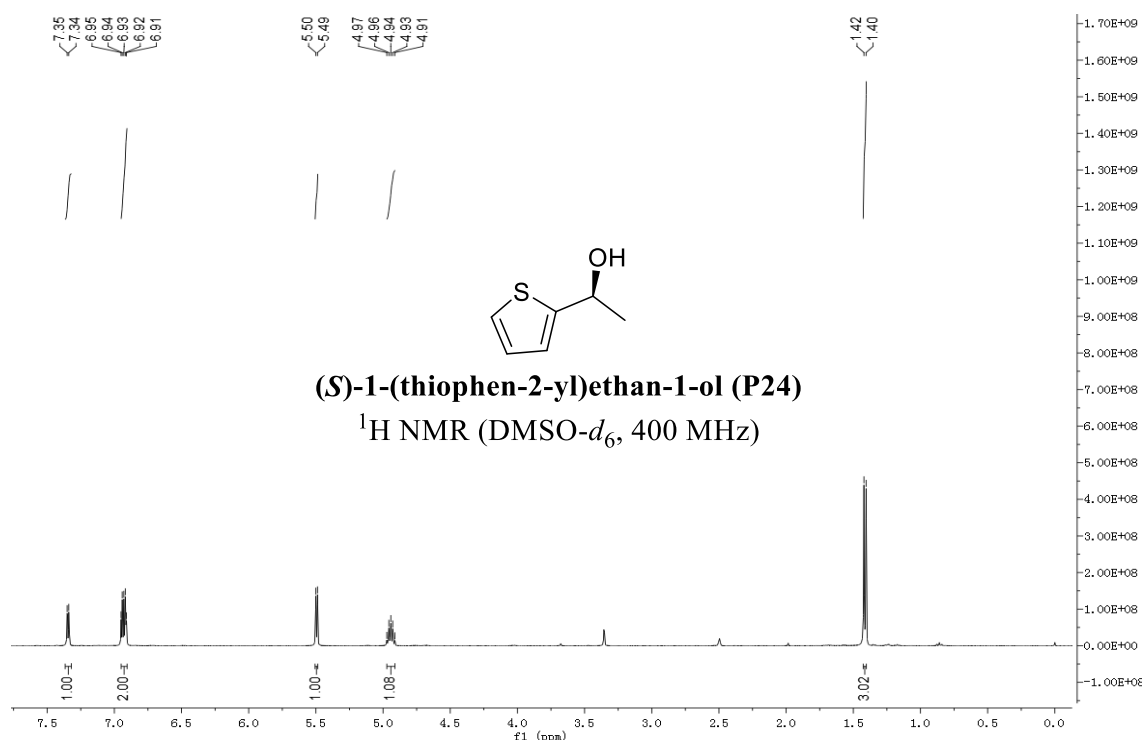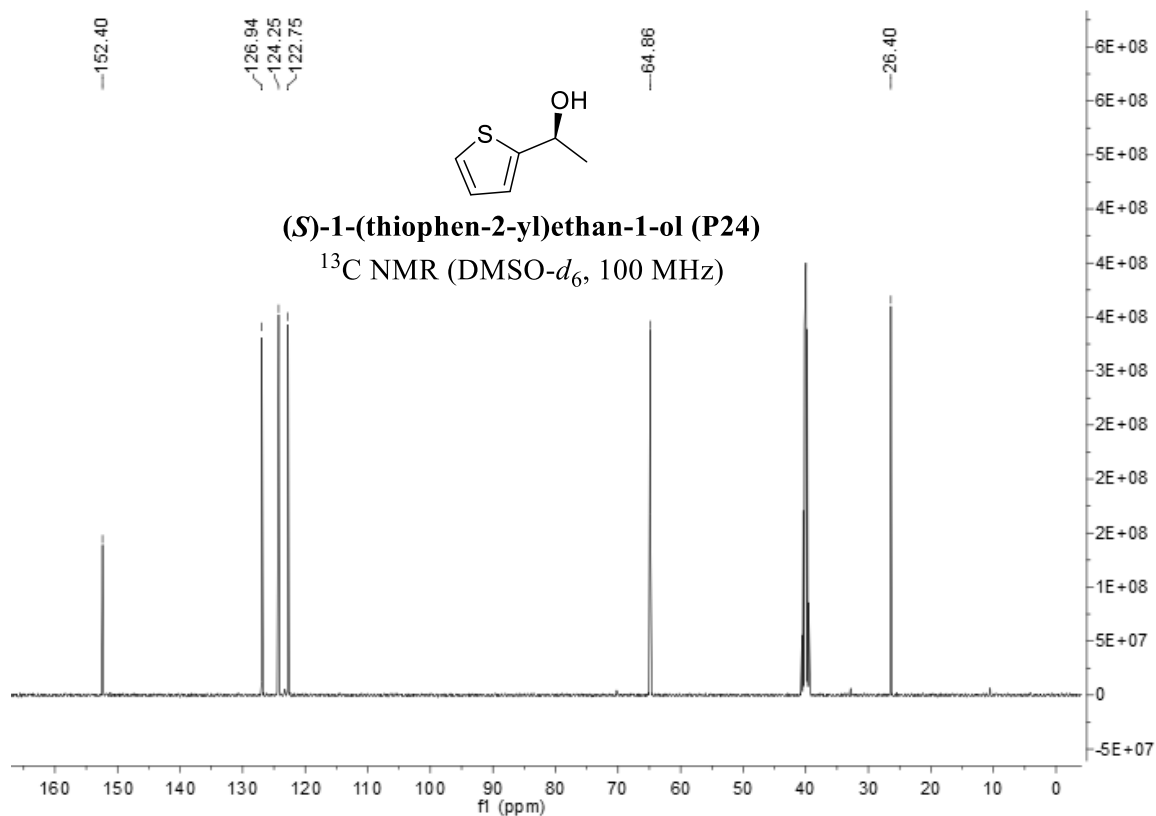

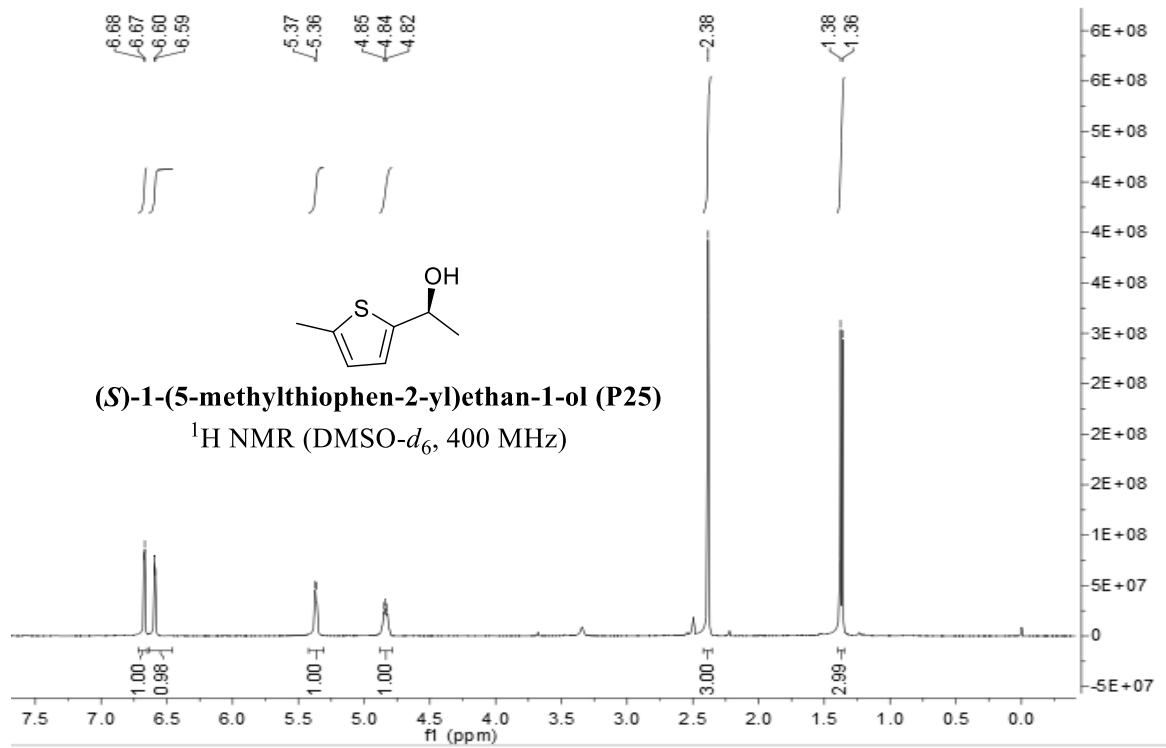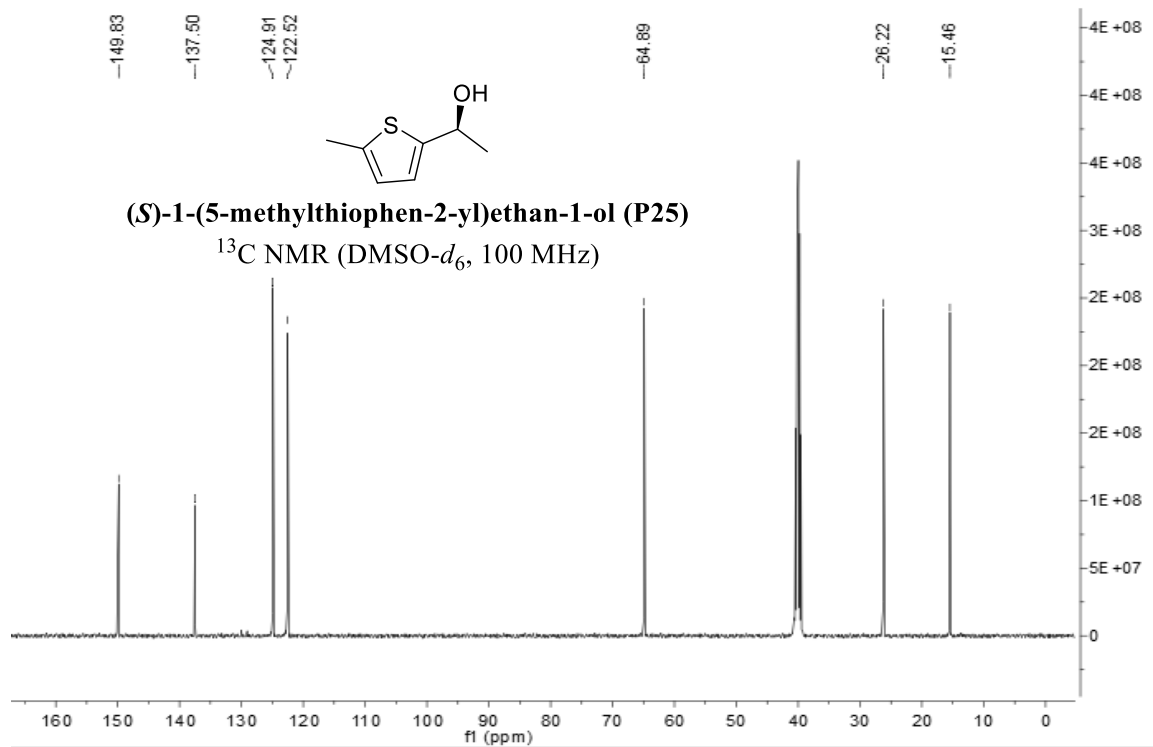

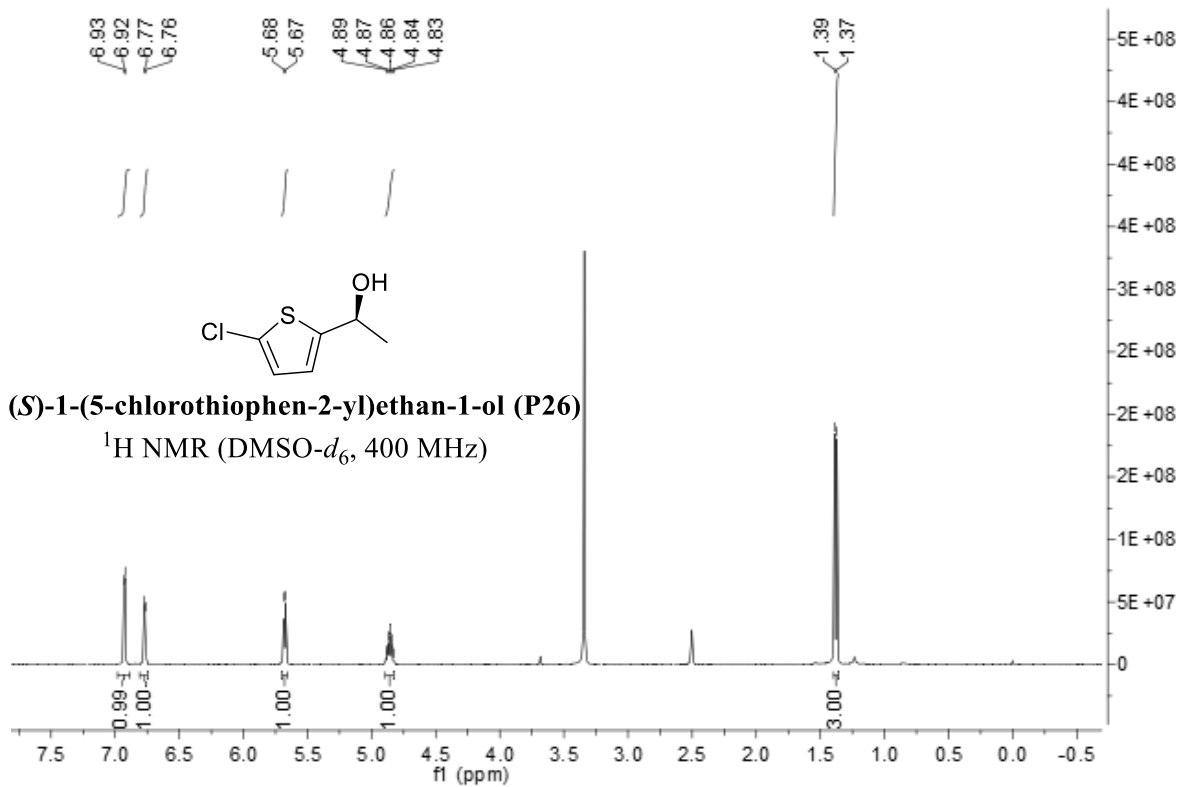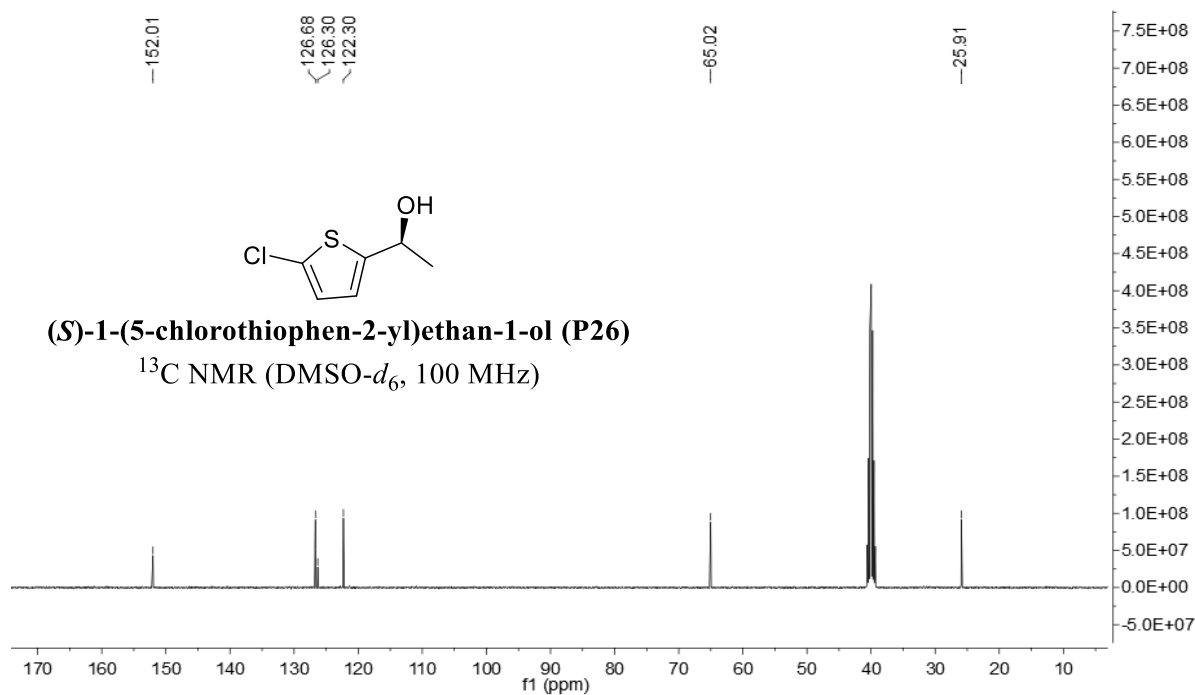

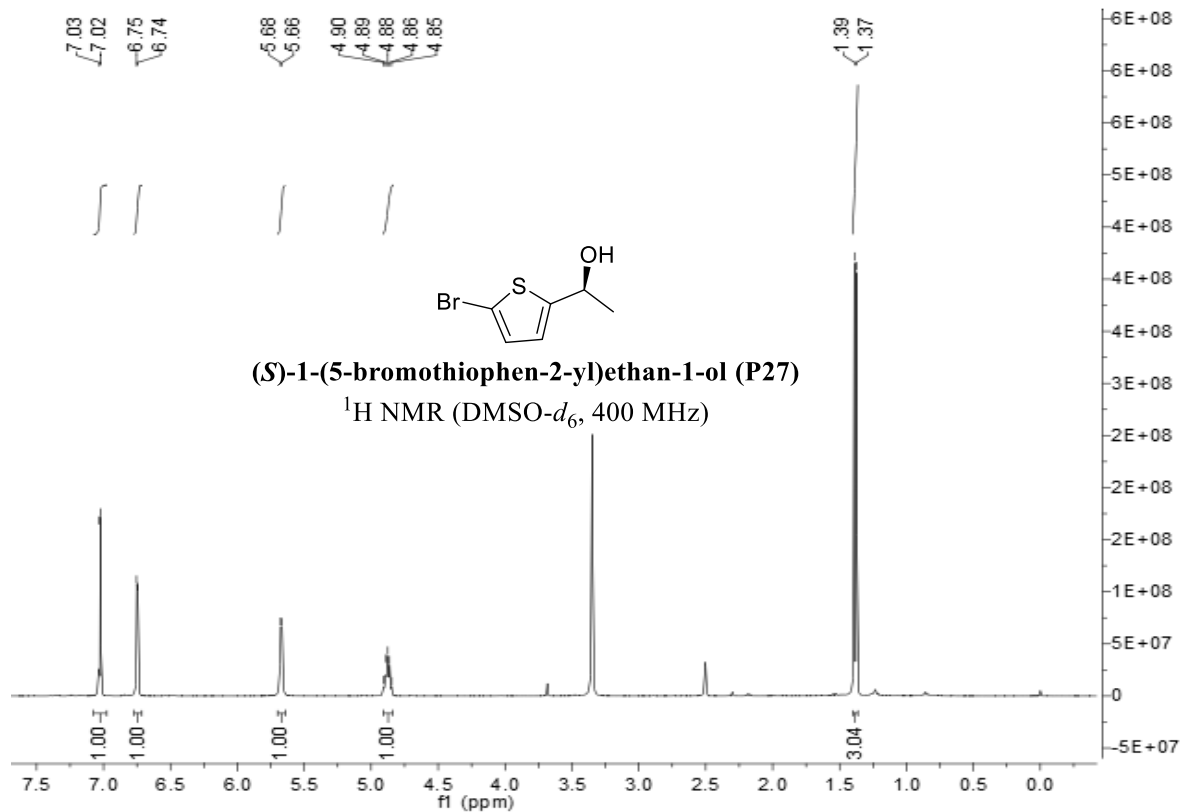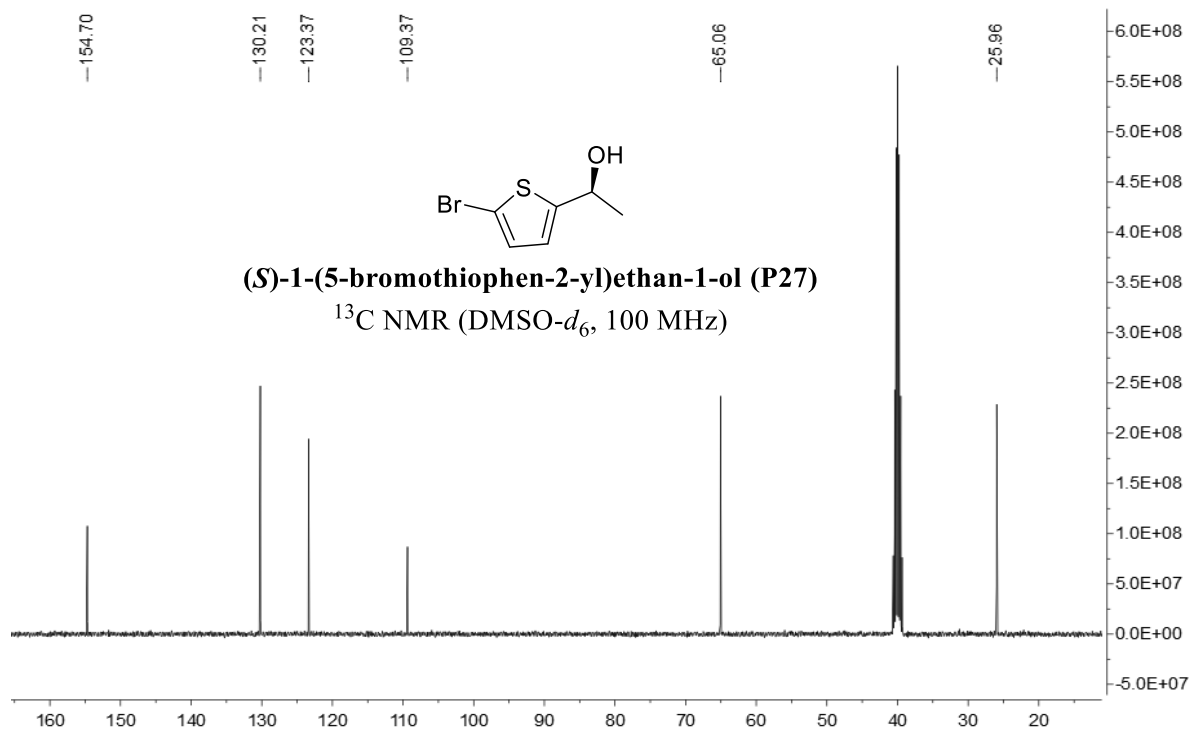



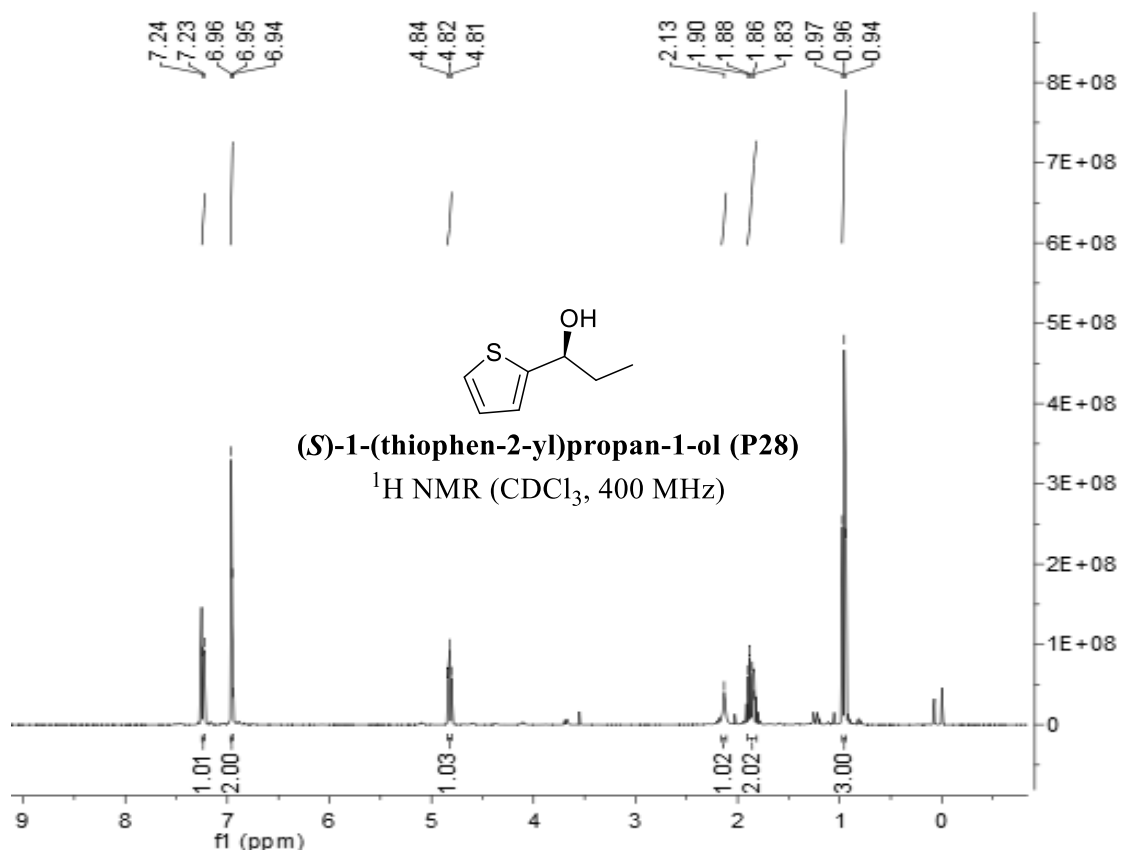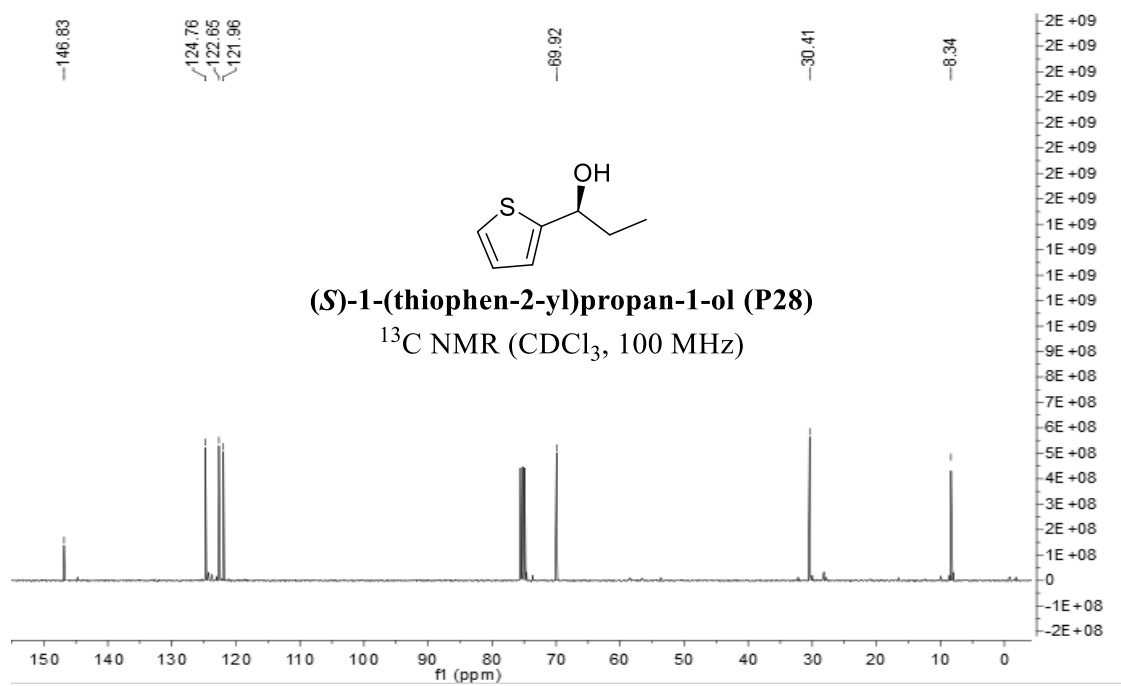

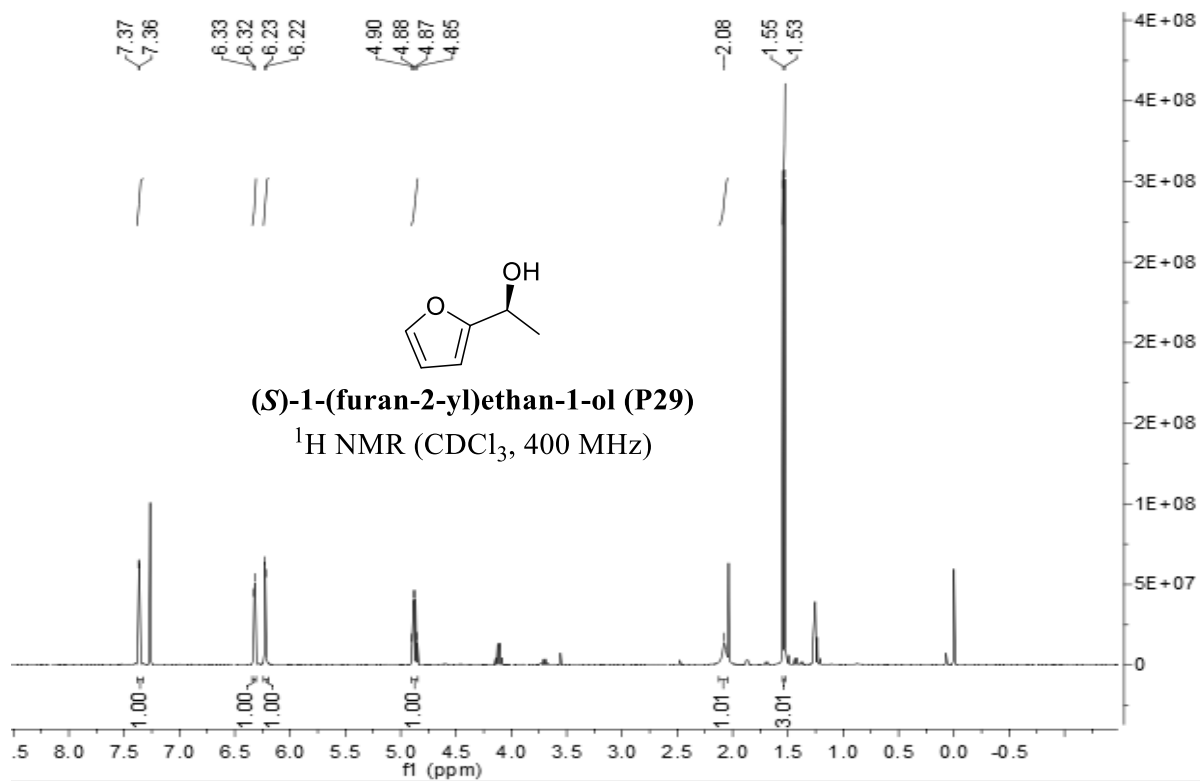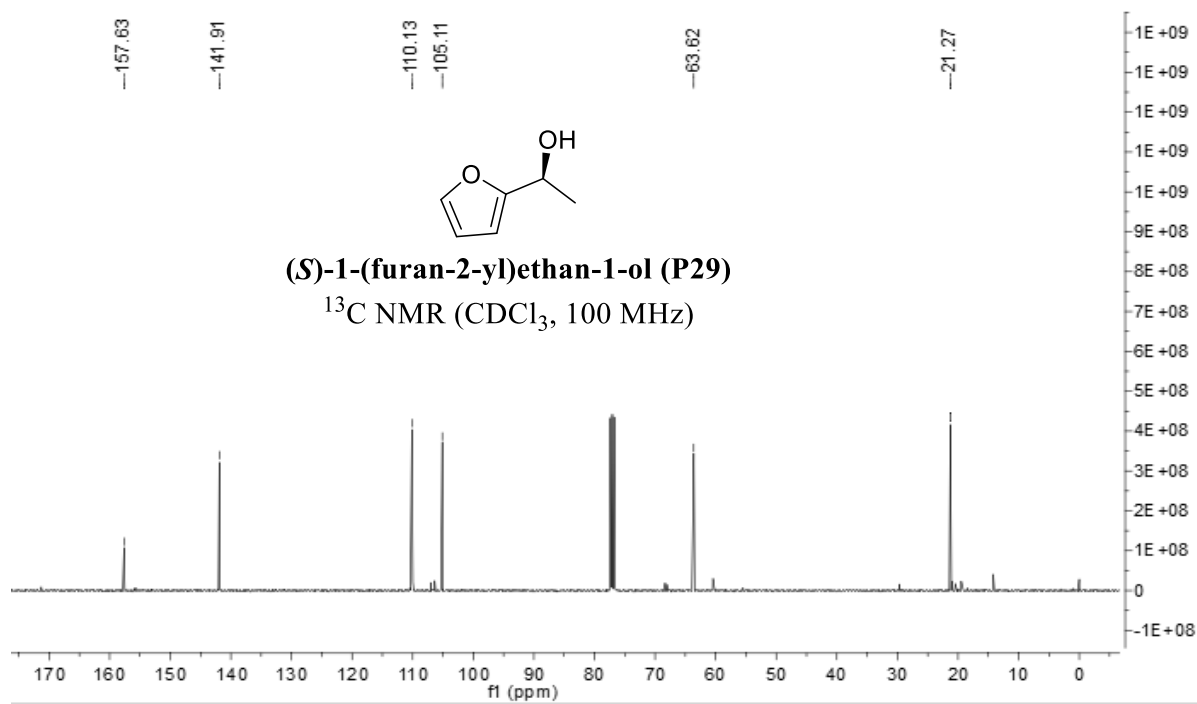

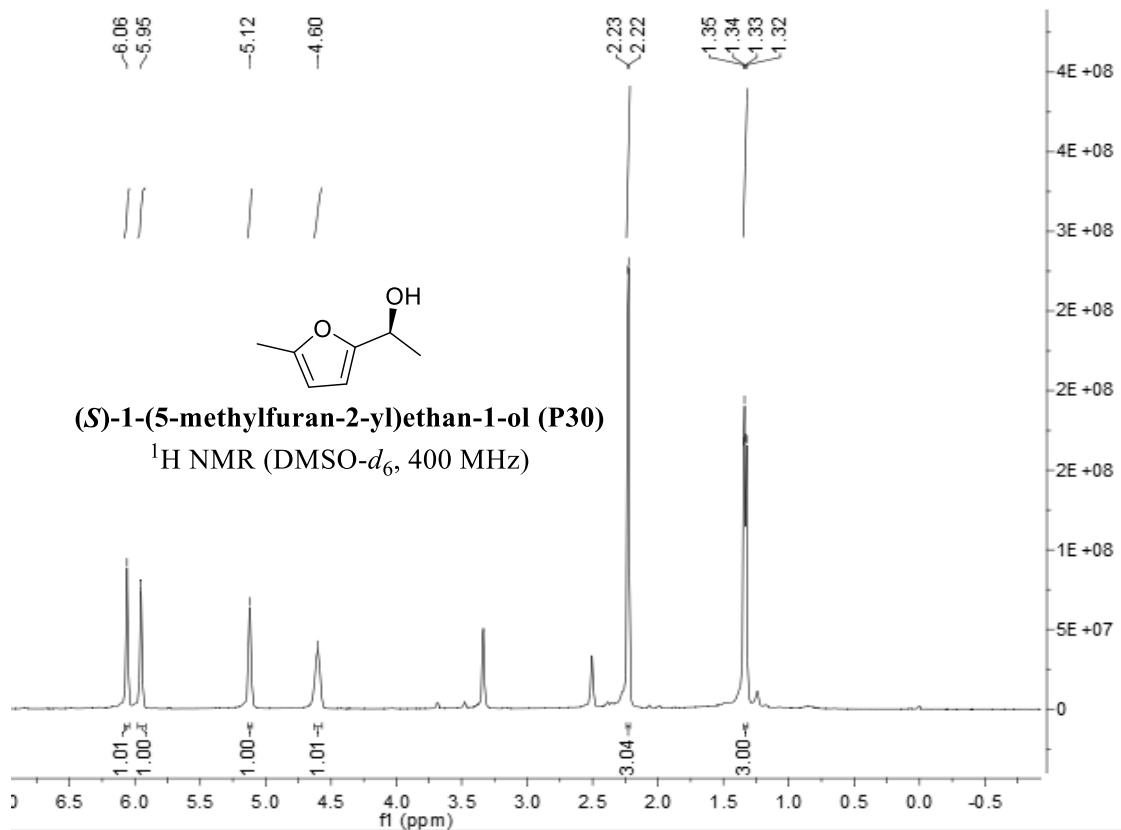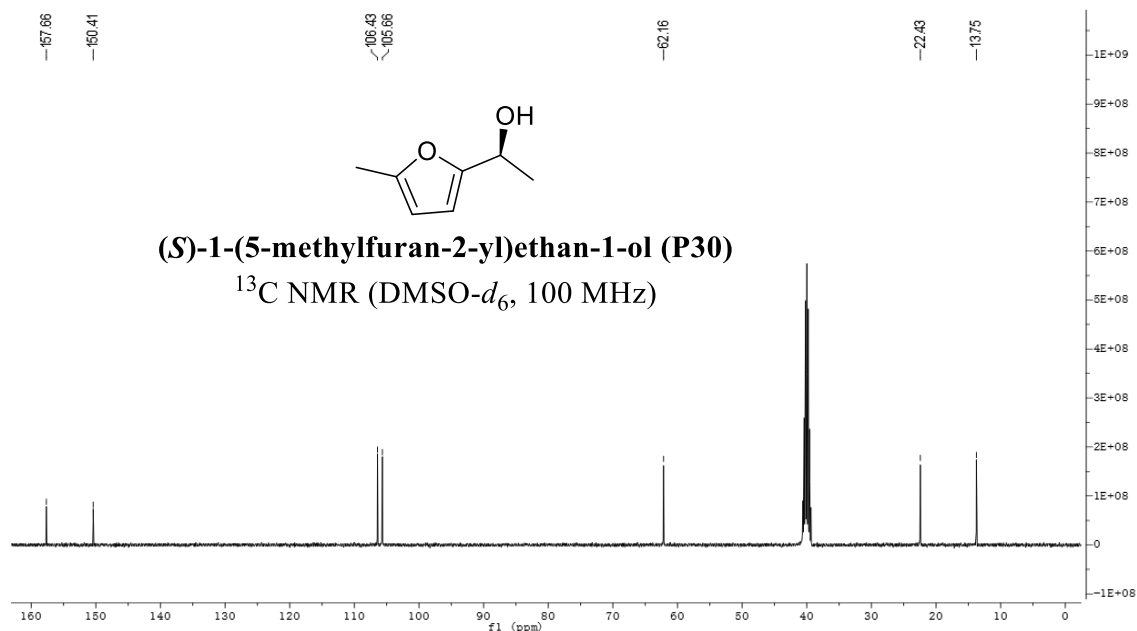

## 5. Chiral analysis:

**(±)-1-Phenylethanol:** The racemate was determined by GC equipped with a chiral  $\beta$ -DEX<sup>TM</sup>120 (df = 0.25 $\mu$ m, 0.25 mm i.d. $\times$ 30 m, fused silica capillary column); carrier gas: H<sub>2</sub>; injector temperature: 250 °C; detector temperature: 250 °C; column temperature: 115 °C; inlet pressure = 0.08 MPa.

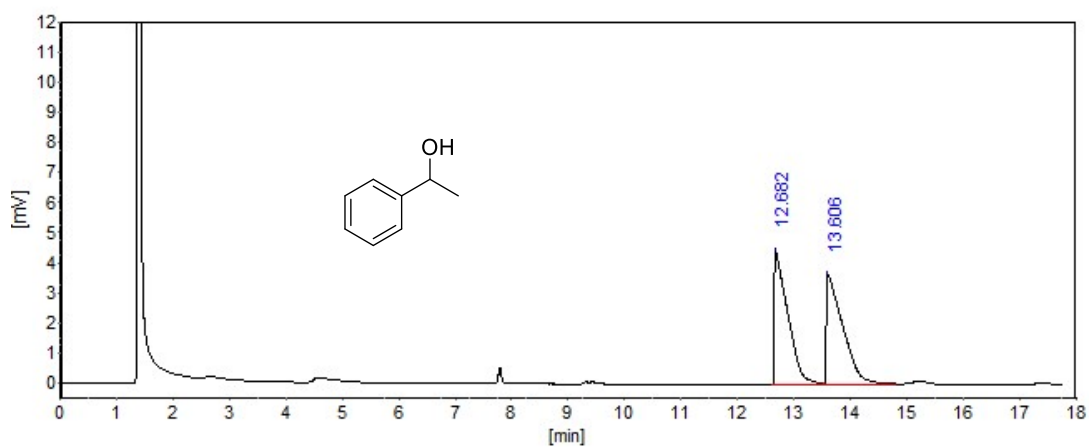

**(S)-1-Phenylethanol (P1):** 90% ee (S). The enantiomeric excess was determined by GC equipped with a chiral  $\beta$ -DEX<sup>TM</sup>120 (df = 0.25 $\mu$ m, 0.25 mm i.d. $\times$ 30 m, fused silica capillary column); carrier gas: H<sub>2</sub>; detector temperature: 250 °C; injector temperature: 250 °C; column temperature: 115 °C; inlet pressure = 0.08 MPa.

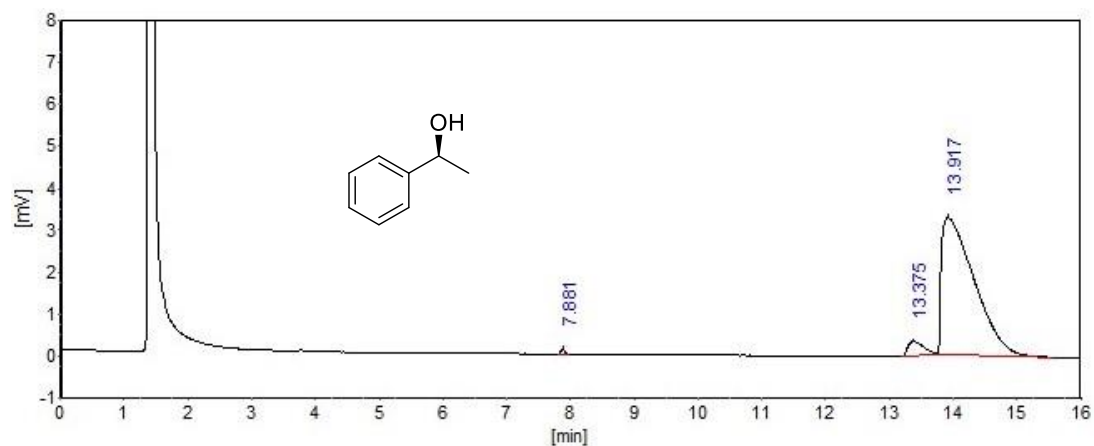

| peak | Retention time<br>[min] | Area<br>[uv*s] | %Area  |
|------|-------------------------|----------------|--------|
| 2    | 13.375                  | 5825           | 4.822  |
| 3    | 13.917                  | 114988         | 95.178 |

**(±)-1-o-Tolyl-ethanol:** The racemate was determined by GC equipped with a chiral  $\beta$ -DEX<sup>TM</sup>120 (df = 0.25  $\mu$ m, 0.25 mm i.d.×30 m, fused silica capillary column); carrier gas: H<sub>2</sub>; detector temperature: 250 °C; injector temperature: 250 °C; column temperature: 125 °C; inlet pressure = 0.06 MPa.

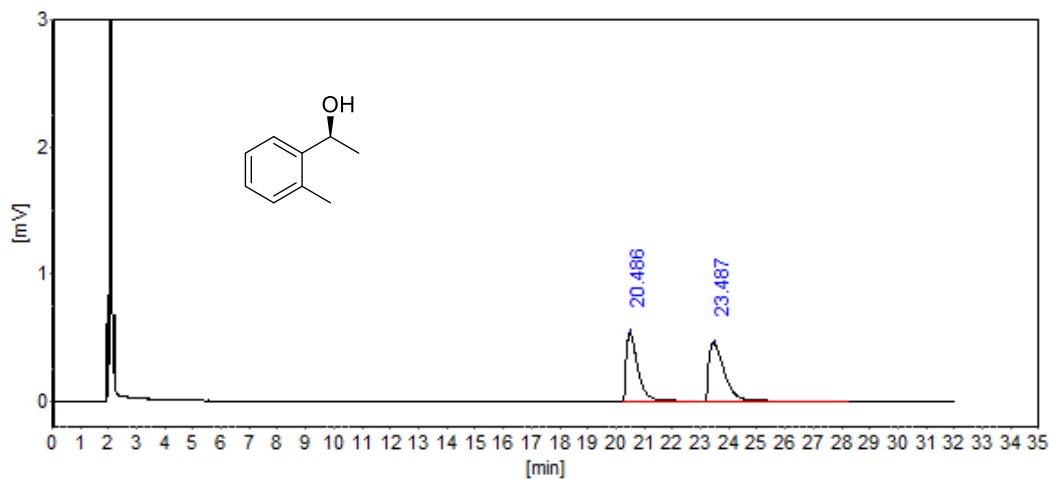

**(S)-1-o-Tolyl-ethanol (P2):** 96% ee (S). The enantiomeric excess were determined by GC equipped with a chiral  $\beta$ -DEX<sup>TM</sup>120 (df = 0.25 $\mu$ m, 0.25 mm i.d.×30 m, fused silica capillary column); carrier gas: H<sub>2</sub>; detector temperature: 250 °C; injector temperature: 250 °C; column temperature: 125 °C; inlet pressure = 0.06 MPa.

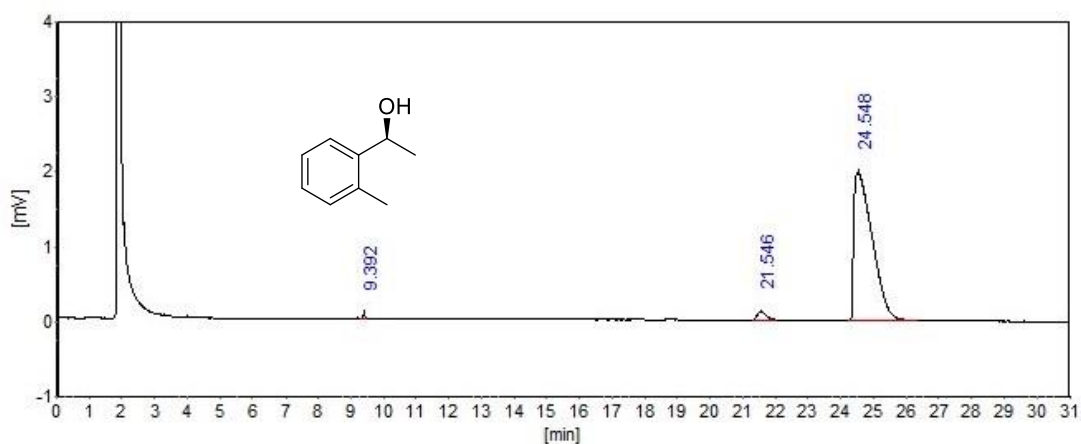

| peak | Retention time<br>[min] | Area<br>[uv*s] | %Area  |
|------|-------------------------|----------------|--------|
| 2    | 21.546                  | 1917           | 2.128  |
| 3    | 24.548                  | 76834          | 97.872 |

**(±)-1-(2-Methoxy-phenyl)-ethanol:** The racemate was determined by GC equipped with a chiral  $\beta$ -DEX™120 (df = 0.25 $\mu$ m, 0.25 mm i.d.×30 m, fused silica capillary column); carrier gas: H<sub>2</sub>; detector temperature: 250 °C; injector temperature: 250 °C; column temperature: 125 °C; inlet pressure = 0.06 MPa.

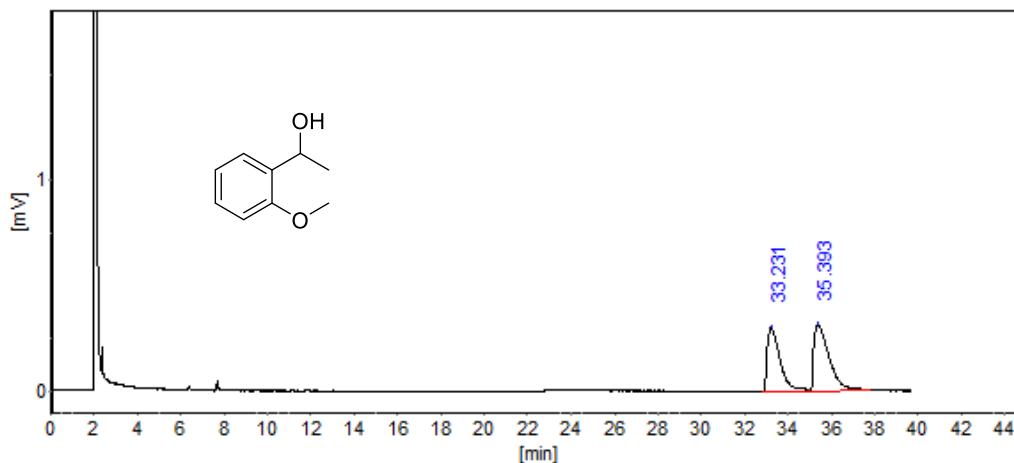

**(S)-1-(2-Methoxy-phenyl)-ethanol (P3):** 99% ee (S). The enantiomeric excess was determined by GC equipped with a chiral  $\beta$ -DEX™120 (df = 0.25  $\mu$ m, 0.25 mm i.d.×30 m, fused silica capillary column); carrier gas: H<sub>2</sub>; detector temperature: 250 °C; injector temperature: 250 °C; column temperature: 125 °C; inlet pressure = 0.06 MPa.

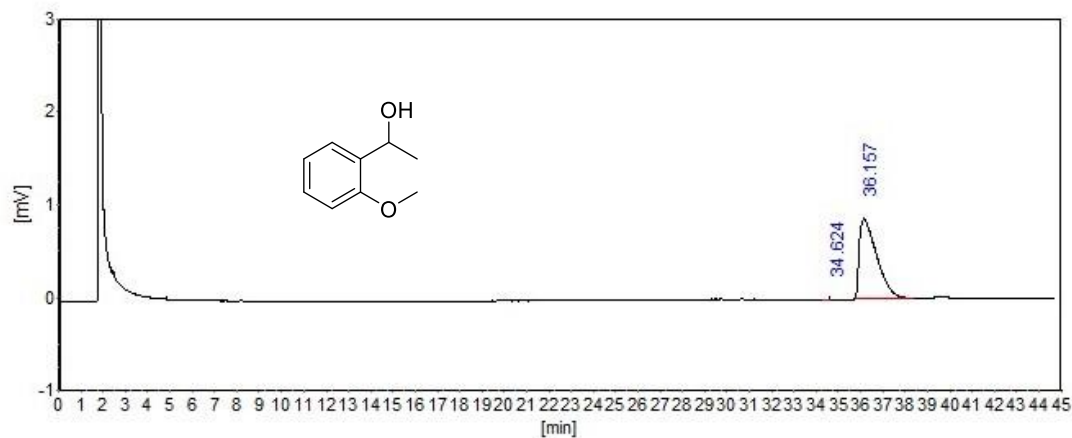

| peak | Retention time<br>[min] | Area<br>[uv*s] | %Area  |
|------|-------------------------|----------------|--------|
| 1    | 34.624                  | 34             | 0.072  |
| 2    | 36.157                  | 46910          | 99.927 |

**(±)-1-(2-Fluoro-phenyl)-ethanol:** The racemate was determined by GC equipped with a chiral  $\beta$ -DEX™120 (df = 0.25 $\mu$ m, 0.25 mm i.d.×30 m, fused silica capillary column); carrier gas: H<sub>2</sub>; detector temperature: 250 °C; injector temperature: 250 °C; column temperature: 115 °C; inlet pressure = 0.08 MPa.

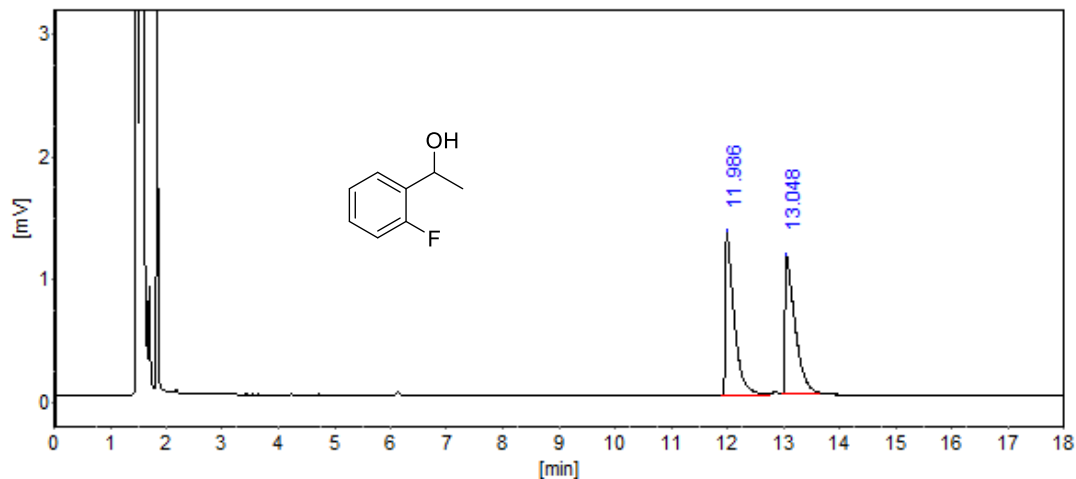

**(S)-1-(2-Fluoro-phenyl)-ethanol (P4):** 89% ee (S). The enantiomeric excess was determined by GC equipped with a chiral  $\beta$ -DEX™120 (df = 0.25 $\mu$ m, 0.25 mm i.d.×30 m, fused silica capillary column); carrier gas: H<sub>2</sub>; detector temperature: 250 °C; injector temperature: 250 °C; column temperature: 115 °C; inlet pressure = 0.08 MPa.

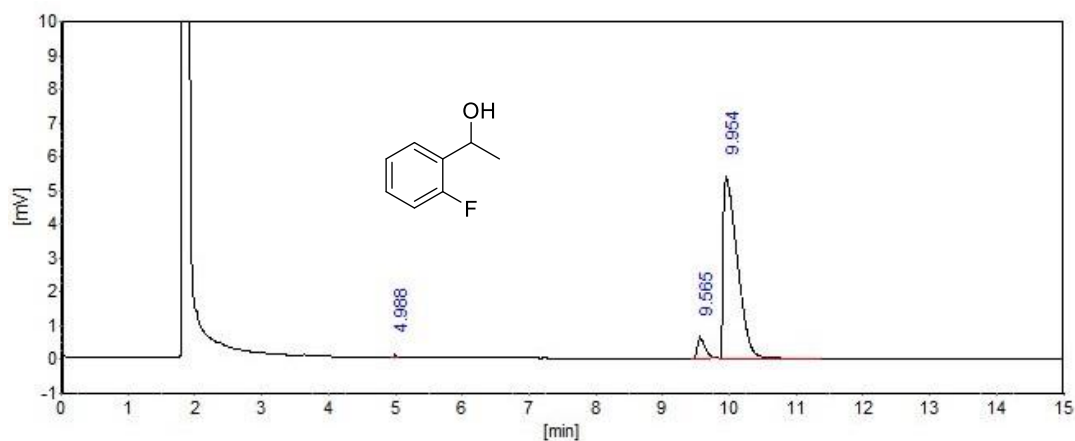

| peak | Retention time<br>[min] | Area<br>[uv*s] | %Area  |
|------|-------------------------|----------------|--------|
| 2    | 9.565                   | 4813           | 5.345  |
| 3    | 9.954                   | 78798          | 94.655 |

**(±)-1-(2-Chlorophenyl)-ethan-1-ol:** The racemate was determined by GC equipped with a chiral  $\beta$ -DEX™120 (df = 0.25 $\mu$ m, 0.25 mm i.d.×30 m, fused silica capillary column); carrier gas: H<sub>2</sub>; detector temperature: 250 °C; injector temperature: 250 °C; column temperature: 125 °C; inlet pressure = 0.06 MPa.

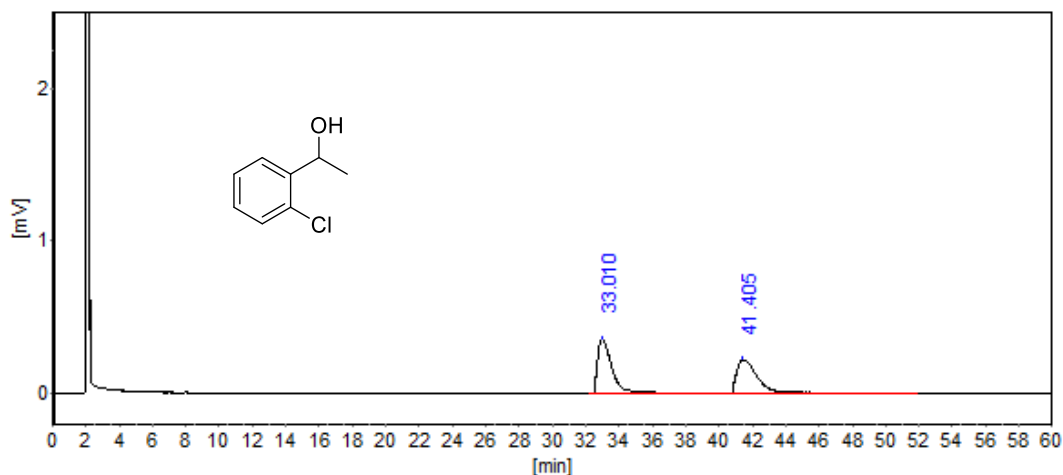

**(S)-1-(2-Chlorophenyl)-ethan-1-ol (P5):** 96% ee (S). The enantiomeric excess was determined by GC equipped with a chiral  $\beta$ -DEX™120 (df = 0.25 $\mu$ m, 0.25 mm i.d.×30 m, fused silica capillary column); carrier gas: H<sub>2</sub>; detector temperature: 250 °C; injector temperature: 250 °C; column temperature: 125 °C; inlet pressure = 0.06 MPa.

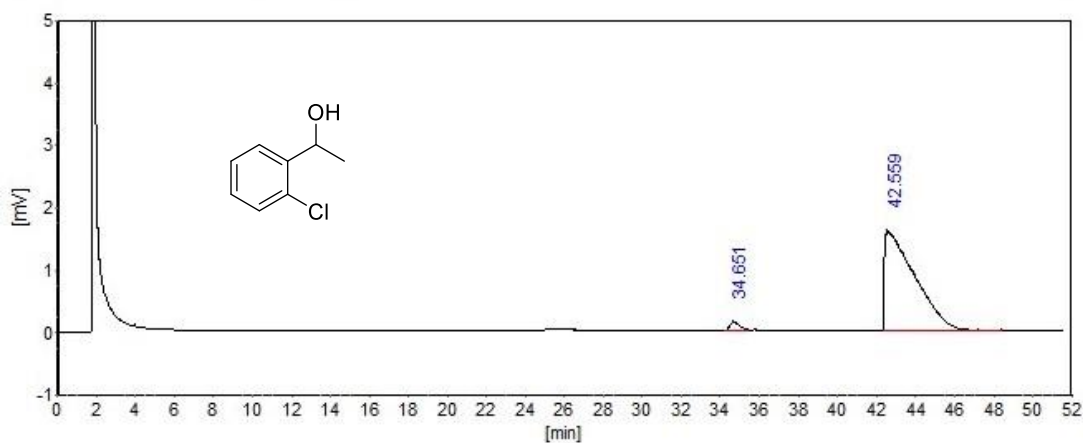

| peak | Retention time<br>[min] | Area<br>[uv*s] | %Area  |
|------|-------------------------|----------------|--------|
| 1    | 34.651                  | 4978           | 2.134  |
| 2    | 42.559                  | 174887         | 97.866 |



**(±)-1-(2-Bromophenyl)-ethan-1-ol:** The racemate was determined by GC equipped with a chiral  $\beta$ -DEX™120 (df = 0.25 $\mu$ m, 0.25 mm i.d.×30 m, fused silica capillary column); carrier gas: H<sub>2</sub>; detector temperature: 250 °C; injector temperature: 250 °C; column temperature: 130 °C; inlet pressure = 0.06 MPa.

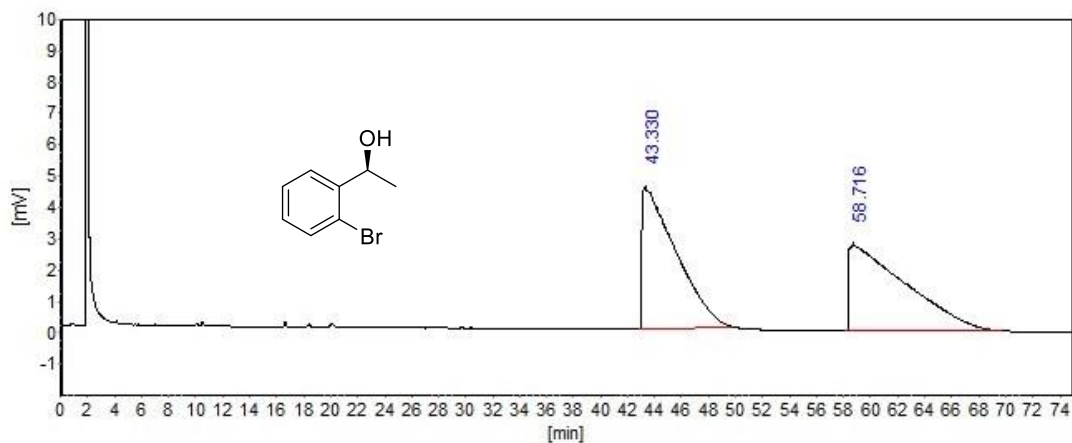

**(S)-1-(2-Bromophenyl)-ethan-1-ol (P6):** 94% ee (S). The enantiomeric excess was determined by GC equipped with a chiral  $\beta$ -DEX™120 (df = 0.25 $\mu$ m, 0.25 mm i.d.×30 m, fused silica capillary column); carrier gas: H<sub>2</sub>; detector temperature: 250 °C; injector temperature: 250 °C; column temperature: 130 °C; inlet pressure = 0.06 MPa.

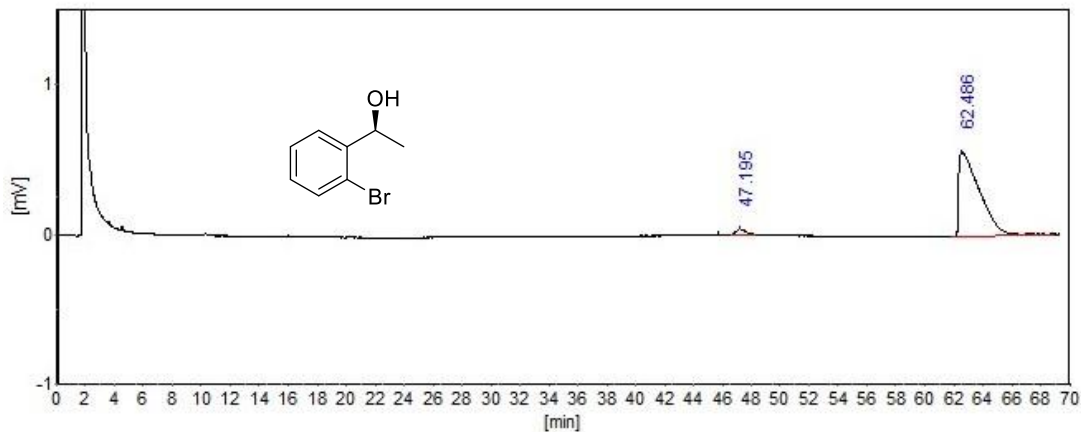

| peak | Retention time<br>[min] | Area<br>[uv*s] | %Area  |
|------|-------------------------|----------------|--------|
| 1    | 47.195                  | 1837           | 3.128  |
| 2    | 62.486                  | 56881          | 96.872 |

**(±)-1-(2-Trifluoromethyl-phenyl)-ethanol:** The racemate was determined by GC equipped with a chiral  $\beta$ -DEX™120 (df = 0.25 $\mu$ m, 0.25 mm i.d.×30 m, fused silica capillary column); carrier gas: H<sub>2</sub>; detector temperature: 250 °C; injector temperature: 250 °C; column temperature: 115 °C; inlet pressure = 0.06 MPa.

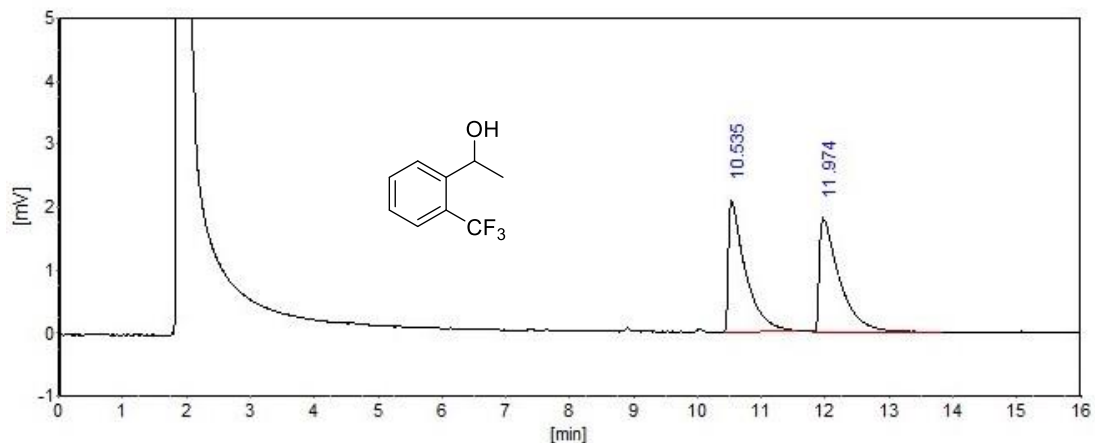

**(S)-1-(2-Trifluoromethyl-phenyl)-ethanol (P7):** 95% ee (S). The enantiomeric excess were determined by GC equipped with a chiral  $\beta$ -DEX™120 (df = 0.25 $\mu$ m, 0.25 mm i.d.×30 m, fused silica capillary column); carrier gas: H<sub>2</sub>; detector temperature: 250 °C; injector temperature: 250 °C; column temperature: 115 °C; inlet pressure = 0.06 MPa

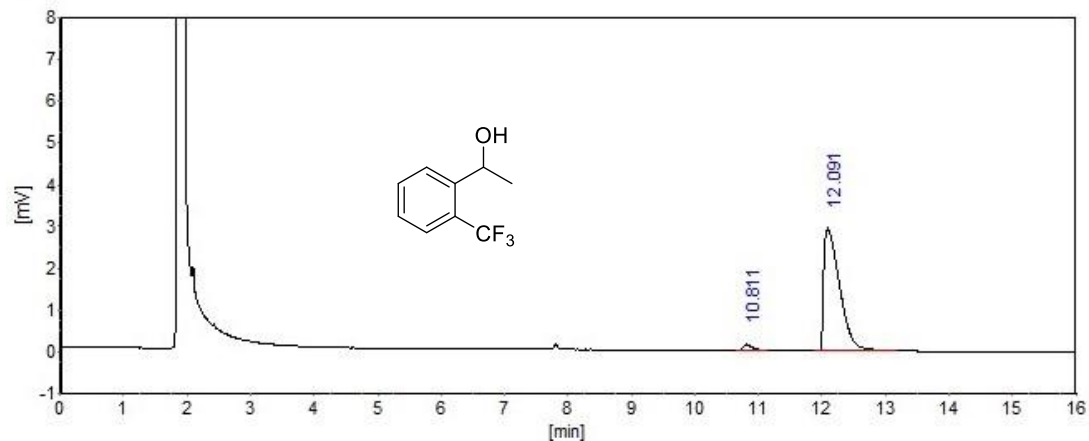

| peak | Retention time<br>[min] | Area<br>[uv*s] | %Area  |
|------|-------------------------|----------------|--------|
| 1    | 47.195                  | 1418           | 2.713  |
| 2    | 62.486                  | 50836          | 97.287 |

**(±)-1-(3-chlorophenyl)ethan-1-ol:** The racemate was determined by GC equipped with a chiral  $\beta$ -DEX™120 (df = 0.25  $\mu$ m, 0.25 mm i.d.×30 m, fused silica capillary column); carrier gas: H<sub>2</sub>; detector temperature: 250 °C; injector temperature: 250 °C; column temperature: 130°C; inlet pressure = 0.08 MPa.

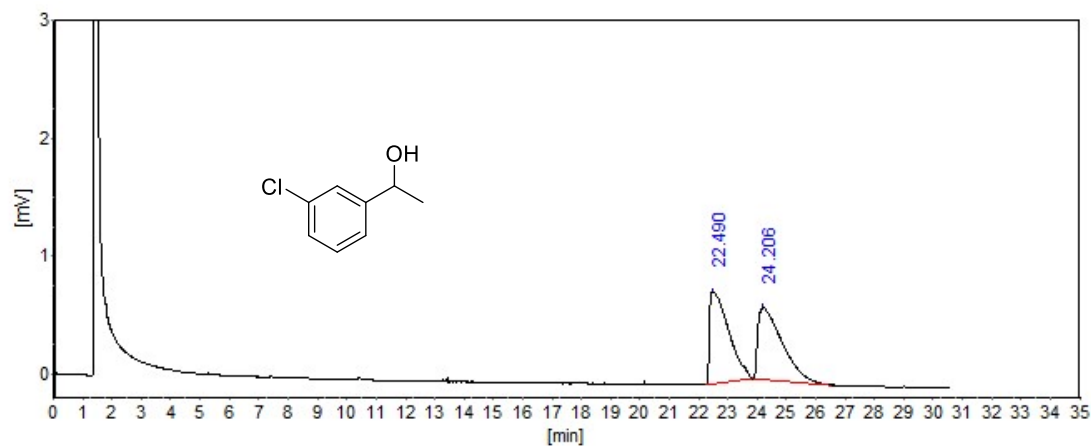

**(S)-1-(3-chlorophenyl)ethan-1-ol (P8):** 87% ee (S). The enantiomeric excess were determined by GC equipped with a chiral  $\beta$ -DEX™120 (df = 0.25 $\mu$ m, 0.25 mm i.d.×30 m, fused silica capillary column); carrier gas: H<sub>2</sub>; detector temperature: 250 °C; injector temperature: 250 °C; column temperature: 130°C; inlet pressure = 0.08 MPa.

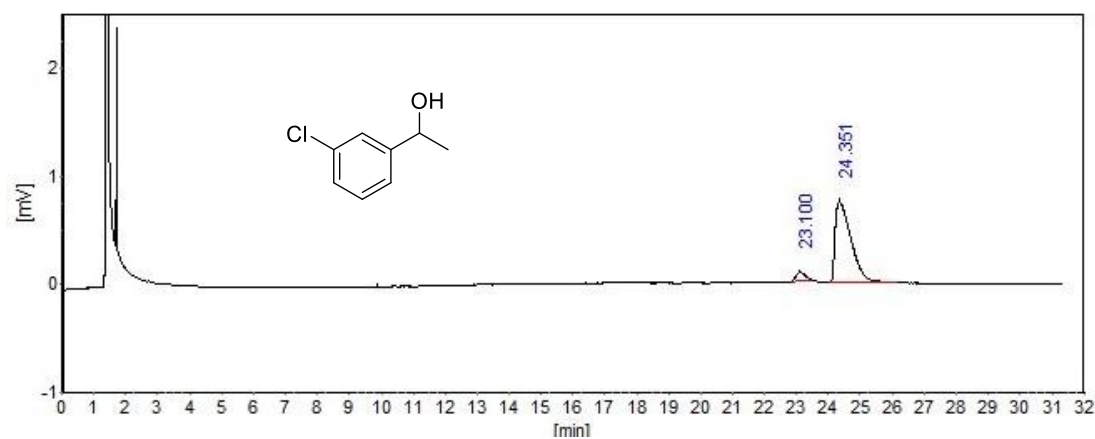

| peak | Retention time<br>[min] | Area<br>[uv*s] | %Area  |
|------|-------------------------|----------------|--------|
| 1    | 23.100                  | 1700           | 6.184  |
| 2    | 24.351                  | 25797          | 93.816 |

**(±)-1-(3-bromophenyl)ethan-1-ol:** The racemate was determined by GC equipped with a chiral  $\beta$ -DEX™120 (df = 0.25  $\mu$ m, 0.25 mm i.d.×30 m, fused silica capillary column); carrier gas: H<sub>2</sub>; detector temperature: 250 °C; injector temperature: 250 °C; column temperature: 140 °C; inlet pressure = 0.08 MPa.

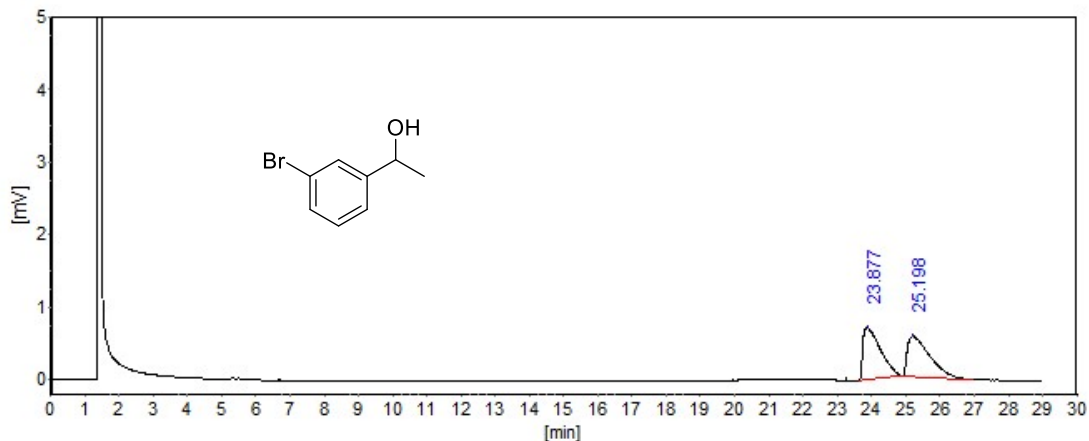

**(S)-1-(3-bromophenyl)ethan-1-ol (P9):** 87% ee (S). The enantiomeric excess were determined by GC equipped with a chiral  $\beta$ -DEX™120 (df = 0.25  $\mu$ m, 0.25 mm i.d.×30 m, fused silica capillary column); carrier gas: H<sub>2</sub>; detector temperature: 250 °C; injector temperature: 250 °C; column temperature: 140 °C; inlet pressure = 0.08 MPa.

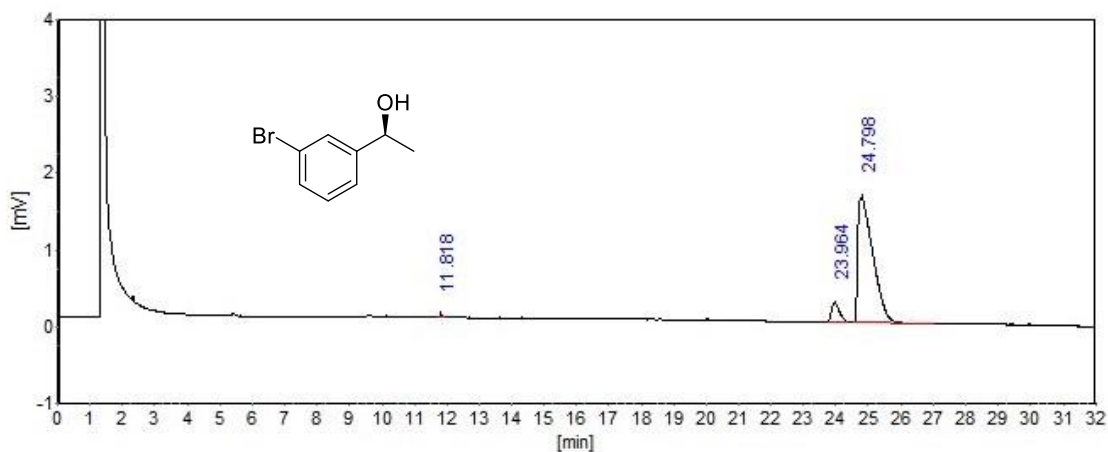

| peak | Retention time<br>[min] | Area<br>[uv*s] | %Area  |
|------|-------------------------|----------------|--------|
| 2    | 23.964                  | 4035           | 6.446  |
| 3    | 24.798                  | 52885          | 93.554 |

**(±)-1-(3-(trifluoromethyl)phenyl)ethan-1-ol:** The racemate was determined by GC equipped with a chiral  $\beta$ -DEX<sup>TM</sup>120 (df = 0.25  $\mu$ m, 0.25 mm i.d.  $\times$  30 m, fused silica capillary column); carrier gas: H<sub>2</sub>; detector temperature: 250 °C; injector temperature: 250 °C; column temperature: 115 °C; inlet pressure = 0.06 MPa.

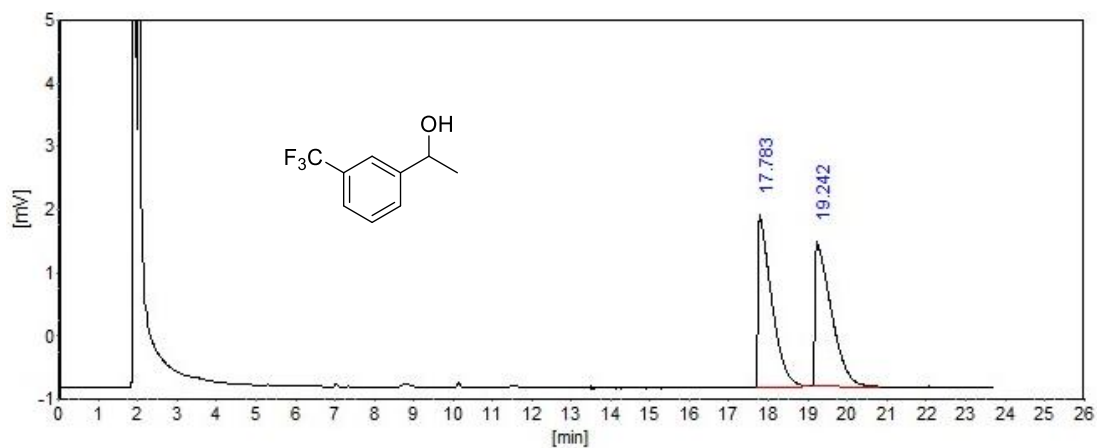

**(S)-1-(3-(trifluoromethyl)phenyl)ethan-1-ol (P10):** 84% ee (S). The enantiomeric excess were determined by GC equipped with a chiral  $\beta$ -DEX<sup>TM</sup>120 (df = 0.25  $\mu$ m, 0.25 mm i.d.  $\times$  30 m, fused silica capillary column); carrier gas: H<sub>2</sub>; detector temperature: 250 °C; injector temperature: 250 °C; column temperature: 115 °C; inlet pressure = 0.06 MPa.

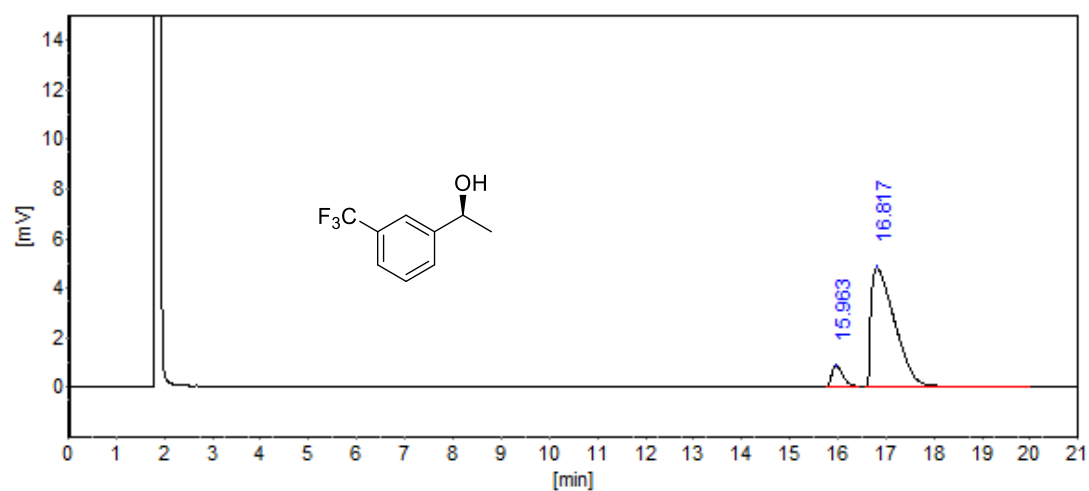

| peak | Retention time<br>[min] | Area<br>[uv*s] | %Area  |
|------|-------------------------|----------------|--------|
| 1    | 15.963                  | 14065          | 7.912  |
| 2    | 16.817                  | 163693         | 92.088 |

**(±)-1-(3-methoxyphenyl)ethan-1-ol:** The racemate was determined by GC equipped with a chiral  $\beta$ -DEX™120 (df = 0.25  $\mu$ m, 0.25 mm i.d.×30 m, fused silica capillary column); carrier gas: H<sub>2</sub>; detector temperature: 250 °C; injector temperature: 250 °C; column temperature: 125 °C; inlet pressure = 0.06 MPa.

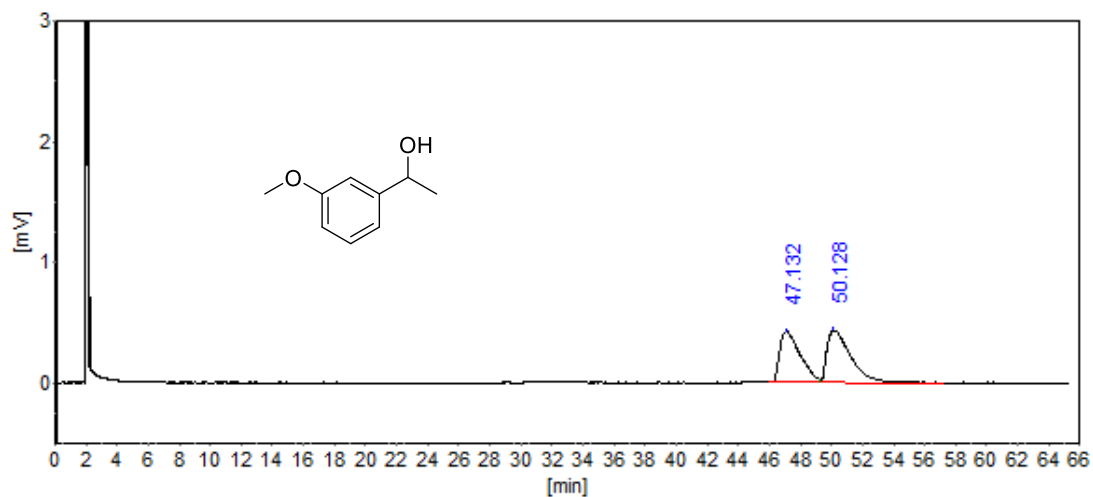

**(S)-1-(3-methoxyphenyl)ethan-1-ol (P11):** 90% ee (S). The enantiomeric excess were determined by GC equipped with a chiral  $\beta$ -DEX™120 (df = 0.25  $\mu$ m, 0.25 mm i.d.×30 m, fused silica capillary column); carrier gas: H<sub>2</sub>; detector temperature: 250 °C; injector temperature: 250 °C; column temperature: 125 °C; inlet pressure = 0.06 MPa.

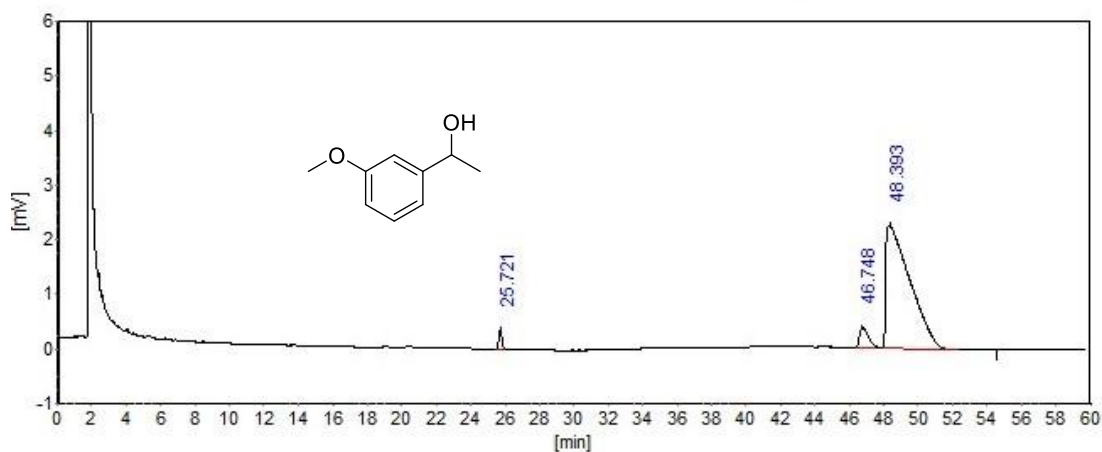

| peak | Retention time<br>[min] | Area<br>[uv*s] | %Area  |
|------|-------------------------|----------------|--------|
| 2    | 46.748                  | 12020          | 4.891  |
| 3    | 48.393                  | 219940         | 95.109 |

**(±)-1-(4-Fluoro-phenyl)-ethanol:** The racemate was determined by GC equipped with a chiral  $\beta$ -DEX™120 (df = 0.25  $\mu$ m, 0.25 mm i.d.×30 m, fused silica capillary column); carrier gas: H<sub>2</sub>; detector temperature: 250 °C; injector temperature: 250 °C; column temperature: 115 °C; inlet pressure = 0.06 MPa.

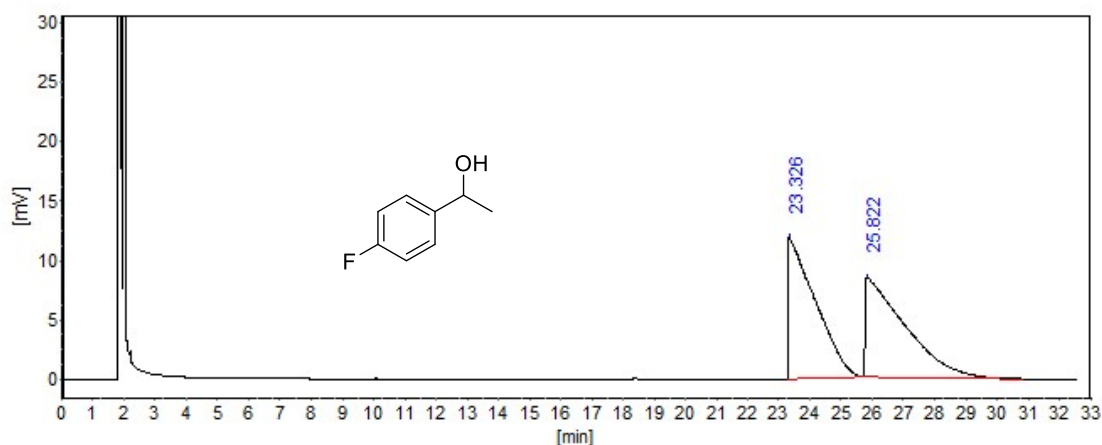

**(S)-1-(4-Fluoro-phenyl)-ethanol (P12):** 81% ee (S). The enantiomeric excess were determined by GC equipped with a chiral  $\beta$ -DEX™120 (df = 0.25  $\mu$ m, 0.25 mm i.d.×30 m, fused silica capillary column); carrier gas: H; detector temperature: 250 °C; injector temperature: 250 °C; column temperature: 115 °C; inlet pressure = 0.06 MPa.

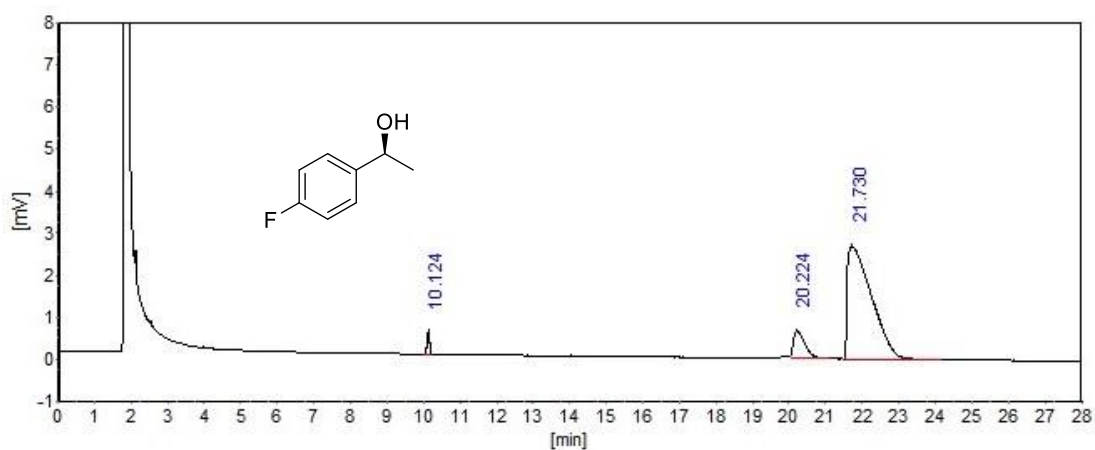

| peak | Retention time<br>[min] | Area<br>[uv*s] | %Area  |
|------|-------------------------|----------------|--------|
| 2    | 20.224                  | 13053          | 9.572  |
| 3    | 21.730                  | 123309         | 90.428 |

**(±)-1-(4-chlorophenyl)ethan-1-ol:** The racemate was determined by GC equipped with a chiral  $\beta$ -DEX™120 (df = 0.25  $\mu$ m, 0.25 mm i.d.×30 m, fused silica capillary column); carrier gas: H<sub>2</sub>; detector temperature: 250 °C; injector temperature: 250 °C; column temperature: 130 °C; inlet pressure = 0.06 MPa.

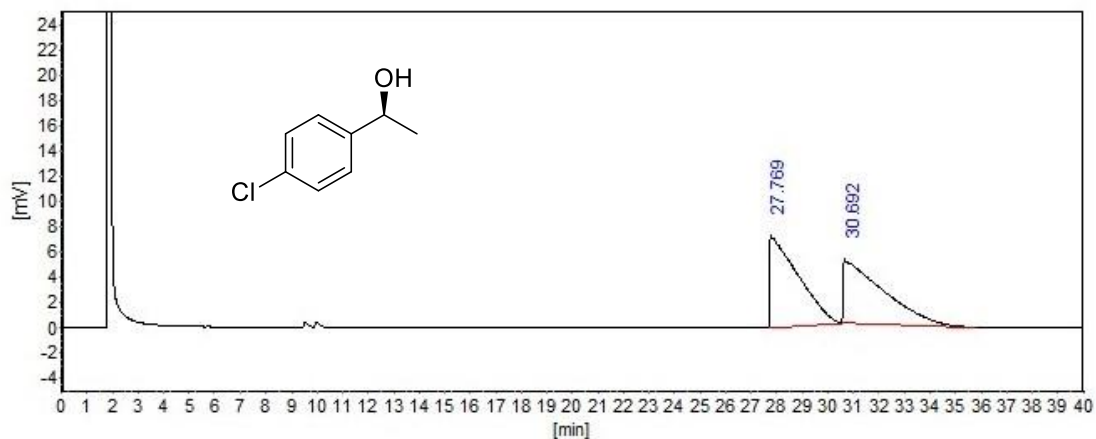

**(S)-1-(4-chlorophenyl)ethan-1-ol (P13):** 93% ee (S) isomer. The enantiomeric excess were determined by GC equipped with a chiral  $\beta$ -DEX™120 (df = 0.25  $\mu$ m, 0.25 mm i.d.×30 m, fused silica capillary column); carrier gas: H<sub>2</sub>; detector temperature: 250 °C; injector temperature: 250 °C; column temperature: 130 °C; inlet pressure = 0.06 MPa.

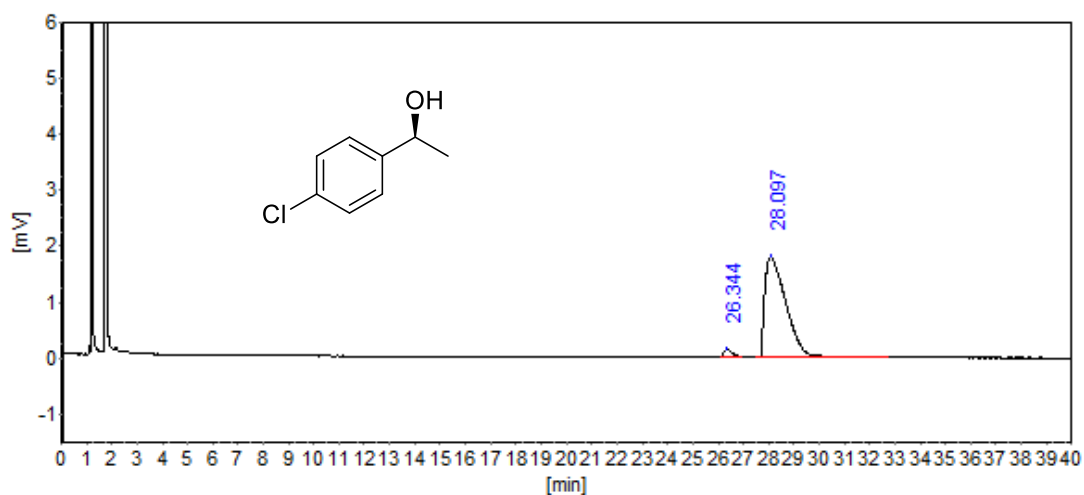

| peak | Retention time<br>[min] | Area<br>[uv*s] | %Area  |
|------|-------------------------|----------------|--------|
| 1    | 26.344                  | 3164           | 3.361  |
| 2    | 28.097                  | 104868         | 96.639 |



**(±)-1-(4-bromophenyl)ethan-1-ol:** The racemate was determined by GC equipped with a chiral  $\beta$ -DEX™120 (df = 0.25  $\mu$ m, 0.25 mm i.d.  $\times$  30 m, fused silica capillary column); carrier gas: H<sub>2</sub>; detector temperature: 250 °C; injector temperature: 250 °C; column temperature: 140 °C; inlet pressure = 0.08 MPa.

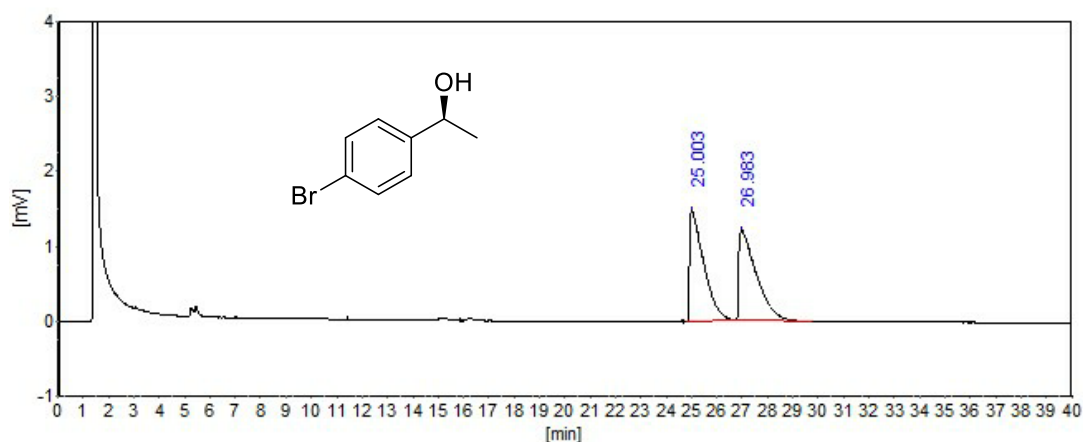

**(S)-1-(4-bromophenyl)ethan-1-ol (P14):** 86% ee (S). The enantiomeric excess was determined by GC equipped with a chiral  $\beta$ -DEX™120 (df = 0.25  $\mu$ m, 0.25 mm i.d.  $\times$  30 m, fused silica capillary column); carrier gas: H<sub>2</sub>; detector temperature: 250 °C; injector temperature: 250 °C; column temperature: 140 °C; inlet pressure = 0.08 MPa.

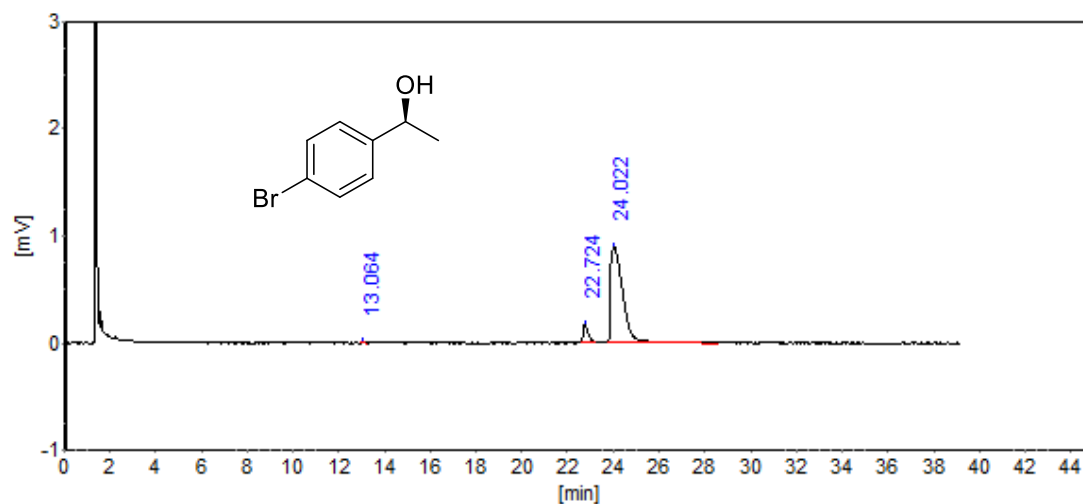

| peak | Retention time<br>[min] | Area<br>[uv*s] | %Area  |
|------|-------------------------|----------------|--------|
| 2    | 22.724                  | 2525           | 6.998  |
| 3    | 24.022                  | 33554          | 93.002 |

**(±)-1-p-Tolyl-ethanol:** The racemate was determined by GC equipped with a chiral  $\beta$ -DEX™120 (df = 0.25  $\mu$ m, 0.25 mm i.d.×30 m, fused silica capillary column); carrier gas: H<sub>2</sub>; detector temperature: 250 °C; injector temperature: 250 °C; column temperature: 115 °C; inlet pressure = 0.08 MPa.

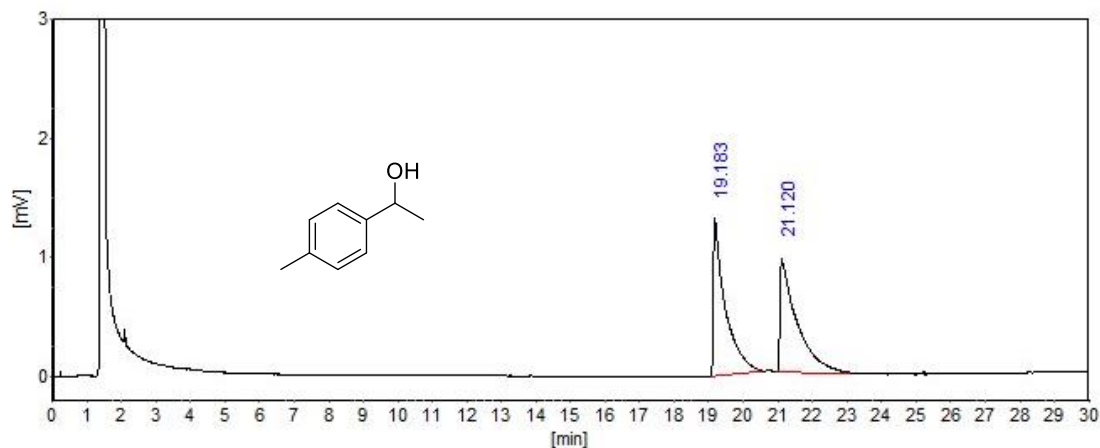

**(S)-1-p-Tolyl-ethanol (P15):** 88% ee (S). The enantiomeric excess were determined by GC equipped with a chiral  $\beta$ -DEX™120 (df = 0.25  $\mu$ m, 0.25 mm i.d.×30 m, fused silica capillary column); carrier gas: H<sub>2</sub>; detector temperature: 250 °C; injector temperature: 250 °C; column temperature: 115 °C; inlet pressure = 0.08 MPa.

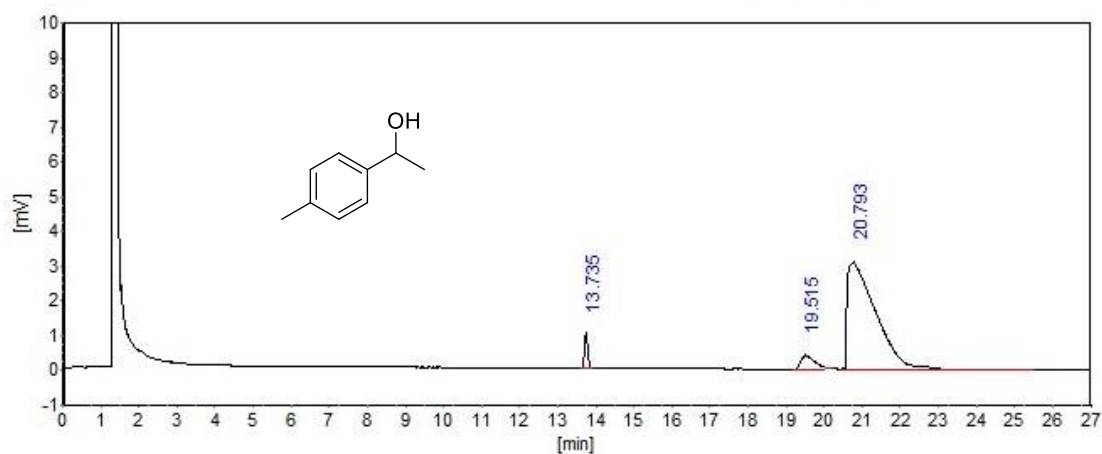

| peak | Retention time<br>[min] | Area<br>[uv*s] | %Area  |
|------|-------------------------|----------------|--------|
| 2    | 19.515                  | 9688           | 5.732  |
| 3    | 20.793                  | 159318         | 94.268 |

**(±)-1-(4-Methoxy-phenyl)-ethanol:** The racemate was determined by GC equipped with a chiral  $\beta$ -DEX™120 (df = 0.25  $\mu$ m, 0.25 mm i.d.×30 m, fused silica capillary column); carrier gas: H<sub>2</sub>; detector temperature: 250 °C; injector temperature: 250 °C; column temperature: 125 °C; inlet pressure = 0.06 MPa.

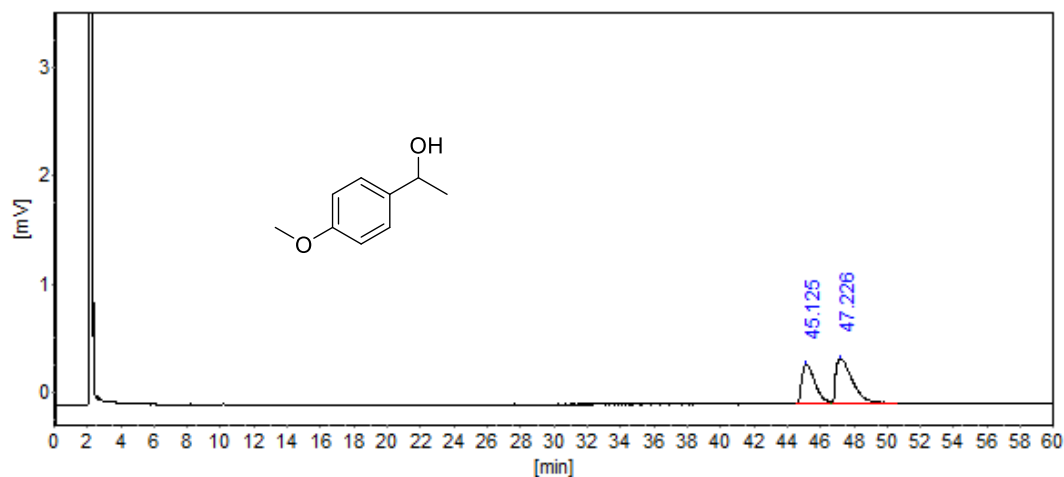

**(S)-1-(4-Methoxy-phenyl)-ethanol (P16):** 88% ee (S). The enantiomeric excess were determined by GC equipped with a chiral  $\beta$ -DEX™120 (df = 0.25  $\mu$ m, 0.25 mm i.d.×30 m, fused silica capillary column); carrier gas: H<sub>2</sub>; detector temperature: 250 °C; injector temperature: 250 °C; column temperature: 125 °C; inlet pressure = 0.06 MPa.

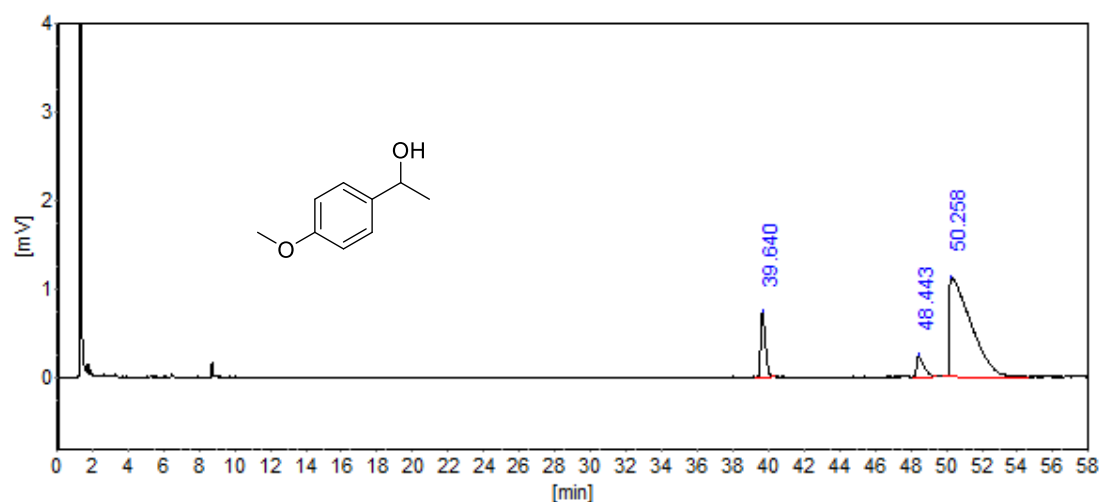

| peak | Retention time<br>[min] | Area<br>[uv*s] | %Area  |
|------|-------------------------|----------------|--------|
| 2    | 48.443                  | 12140          | 6.265  |
| 3    | 50.258                  | 150780         | 93.735 |

**(±)-1-(4-ethylphenyl)ethan-1-ol:** The racemate was determined by GC equipped with a chiral  $\beta$ -DEX™120 (df = 0.25  $\mu$ m, 0.25 mm i.d.×30 m, fused silica capillary column); carrier gas: H<sub>2</sub>; detector temperature: 250 °C; injector temperature: 250 °C; column temperature: 125 °C; inlet pressure = 0.06 MPa.

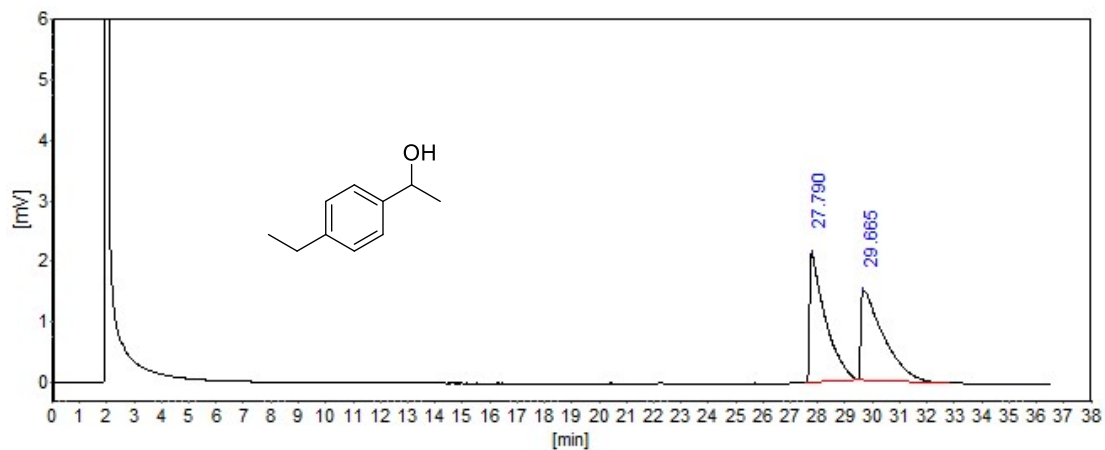

**(S)-1-(4-ethylphenyl)ethan-1-ol (P17):** 91% ee (S). The enantiomeric excess were determined by GC equipped with a chiral  $\beta$ -DEX™120 (df = 0.25 $\mu$ m, 0.25 mm i.d.×30 m, fused silica capillary column); carrier gas: H<sub>2</sub>; detector temperature: 250 °C; injector temperature: 250 °C; column temperature: 125 °C; inlet pressure = 0.06 MPa.

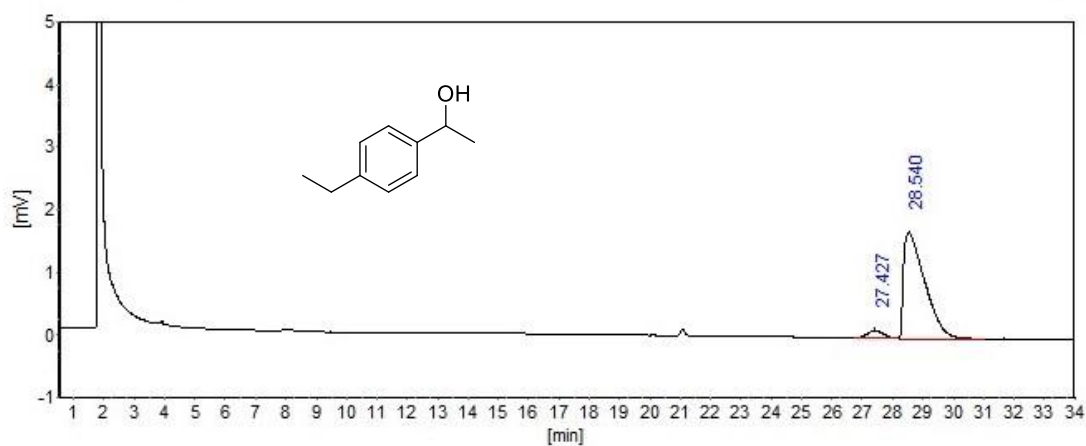

| peak | Retention time<br>[min] | Area<br>[uv*s] | %Area  |
|------|-------------------------|----------------|--------|
| 1    | 27.427                  | 4501           | 4.726  |
| 2    | 28.540                  | 82160          | 95.274 |

**(±)-1-(3,4-dimethoxyphenyl)ethan-1-ol:** The racemate was determined by GC equipped with a chiral  $\beta$ -DEX™120 (df = 0.25  $\mu$ m, 0.25 mm i.d.×30 m, fused silica capillary column); carrier gas: H<sub>2</sub>; detector temperature: 250 °C; injector temperature: 250 °C; column temperature: 135 °C; inlet pressure = 0.1 MPa.

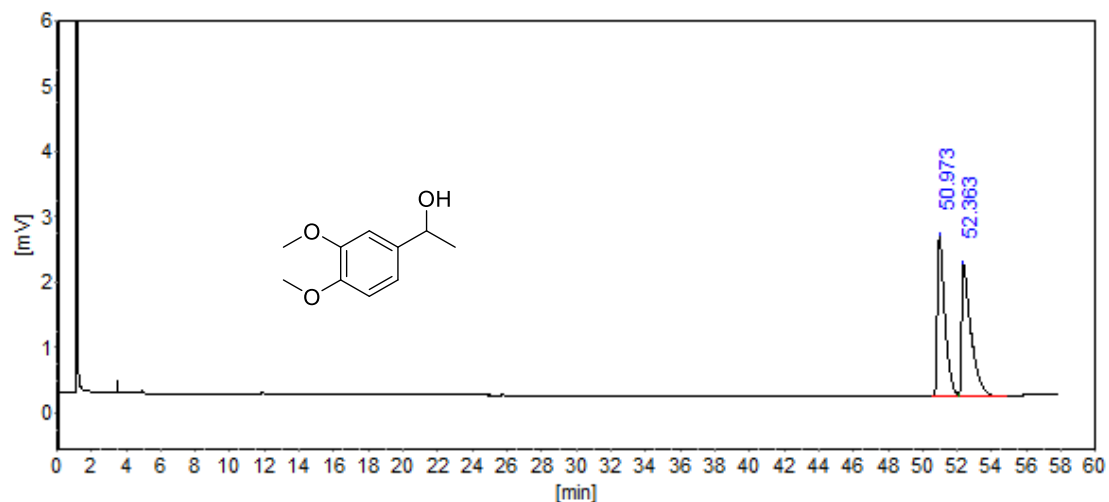

**(S)-1-(3,4-dimethoxyphenyl)ethan-1-ol (P18):** 84% ee (S). The enantiomeric excess were determined by GC equipped with a chiral  $\beta$ -DEX™120 (df = 0.25 $\mu$ m, 0.25 mm i.d.×30 m, fused silica capillary column); carrier gas: H<sub>2</sub>; detector temperature: 250 °C; injector temperature: 250 °C; column temperature: 135 °C; inlet pressure = 0.1 MPa.

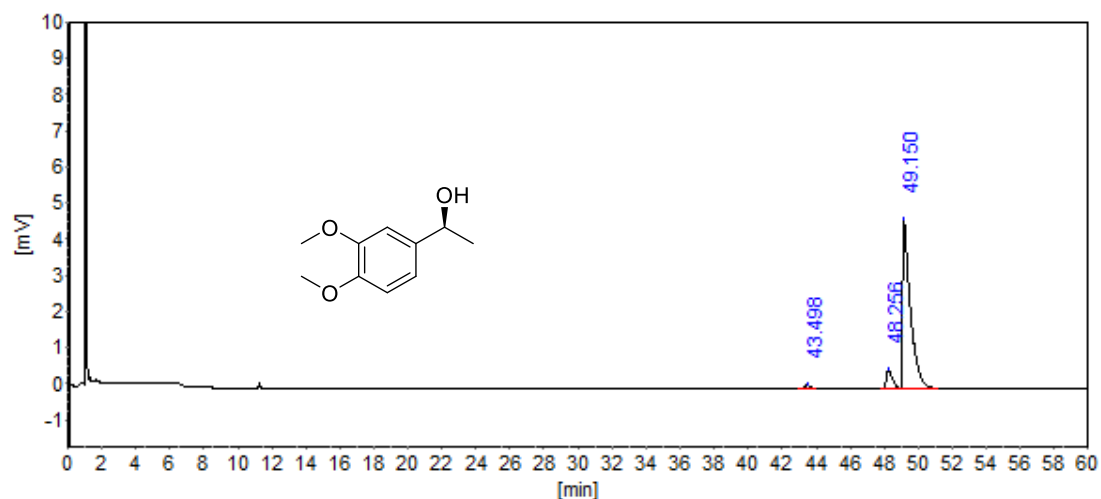

| peak | Retention time<br>[min] | Area<br>[uv*s] | %Area  |
|------|-------------------------|----------------|--------|
| 2    | 48.256                  | 12593          | 7.860  |
| 3    | 49.150                  | 147302         | 91.940 |

**(±)-1-(2,4-dichlorophenyl)ethan-1-ol:** The racemate was determined by GC equipped with a chiral  $\beta$ -DEX™120 (df = 0.25  $\mu$ m, 0.25 mm i.d.×30 m, fused silica capillary column); carrier gas: H<sub>2</sub>; detector temperature: 250 °C; injector temperature: 250 °C; column temperature: 150 °C; inlet pressure = 0.08 MPa.

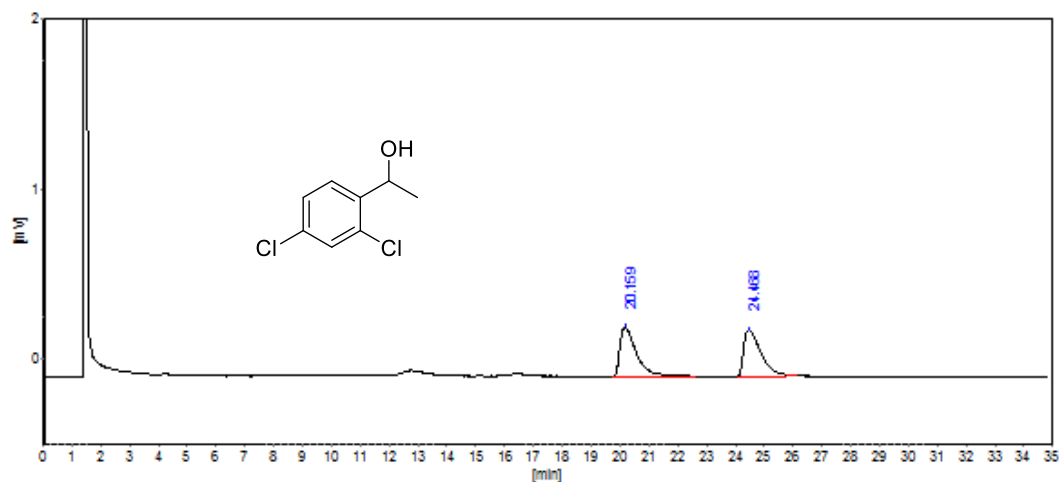

**(S)-1-(2,4-dichlorophenyl)ethan-1-ol (P19):** 88% ee (S). The enantiomeric excess was determined by GC equipped with a chiral  $\beta$ -DEX™120 (df = 0.25  $\mu$ m, 0.25 mm i.d.×30 m, fused silica capillary column); carrier gas: H<sub>2</sub>; detector temperature: 250 °C; injector temperature: 250 °C; column temperature: 150 °C; inlet pressure = 0.08 MPa.

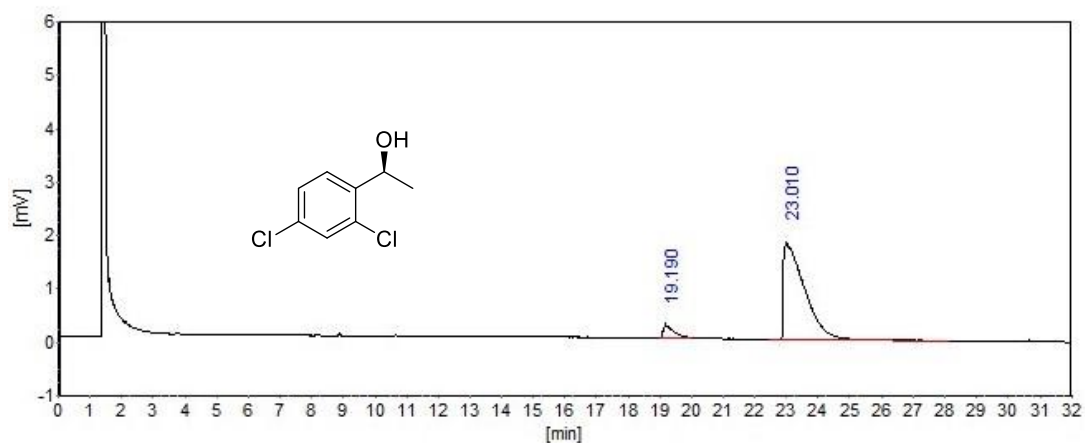

| peak | Retention time<br>[min] | Area<br>[uv*s] | %Area  |
|------|-------------------------|----------------|--------|
| 1    | 19.190                  | 5320           | 5.895  |
| 2    | 23.010                  | 84920          | 94.105 |

**(±)-1-(3,5-bis(trifluoromethyl)phenyl)ethan-1-ol:** The racemate was determined by GC equipped with a chiral  $\beta$ -DEX™120 (df = 0.25  $\mu$ m, 0.25 mm i.d.×30 m, fused silica capillary column); carrier gas: H<sub>2</sub>; detector temperature: 250 °C; injector temperature: 250 °C; column temperature: 115 °C; inlet pressure = 0.06 MPa.

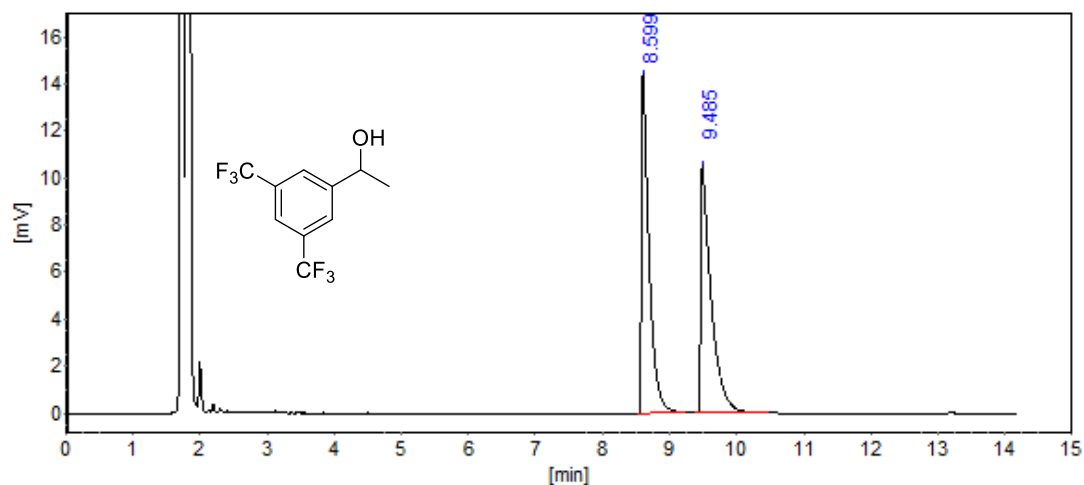

**(S)-1-(3,5-bis(trifluoromethyl)phenyl)ethan-1-ol (P20):** 80% ee (S). The enantiomeric excess were determined by GC equipped with a chiral  $\beta$ -DEX™120 (df = 0.25  $\mu$ m, 0.25 mm i.d.×30 m, fused silica capillary column); carrier gas: H<sub>2</sub>; detector temperature: 250 °C; injector temperature: 250 °C; column temperature: 115 °C; inlet pressure = 0.06 MPa.

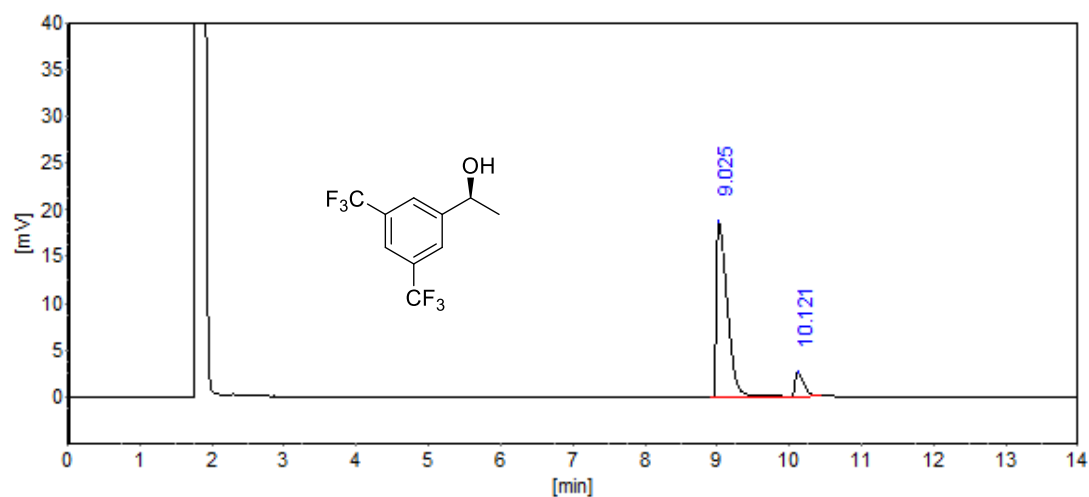

| peak | Retention time<br>[min] | Area<br>[uv*s] | %Area  |
|------|-------------------------|----------------|--------|
| 1    | 9.025                   | 195706         | 90.256 |
| 2    | 10.121                  | 21339          | 9.744  |

**(±)-1-Phenyl-butan-1-ol:** The racemate was determined by HPLC on Chiralcel OD-H column, hexane: isopropanol = 99:1; flow rate = 0.5 mL/min; UV detection at 254 nm.

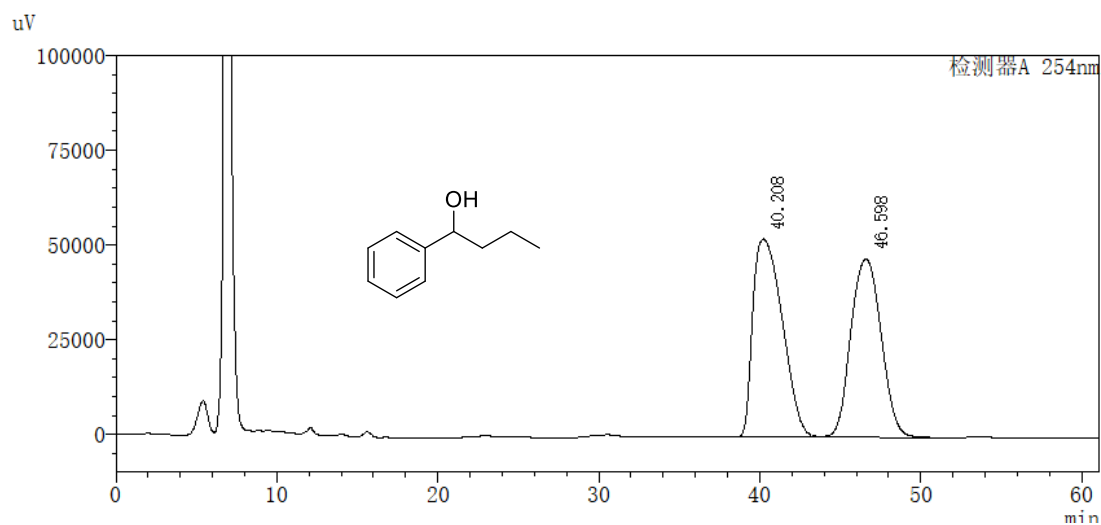

**(S)-1-Phenyl-butan-1-ol (P21):** 92% ee (S). The enantiomeric excess was determined by HPLC on Chiralcel OD-H column, hexane: isopropanol = 99:1; flow rate = 0.5 mL/min; UV detection at 254 nm.

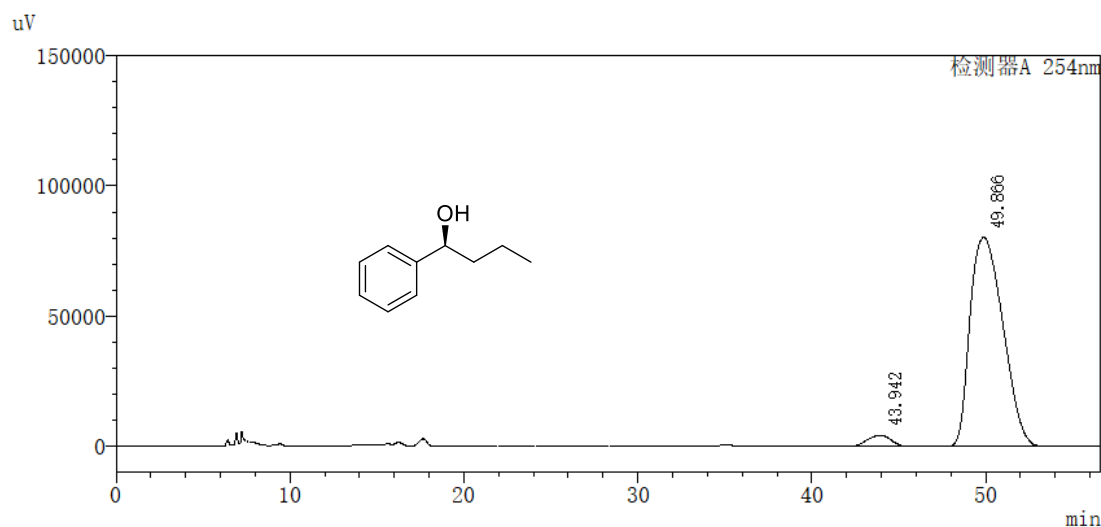

| Peak | Processed Channel | Retention Time (min) | Peak Area (mAU*s) | Peak Hight (mAU) | Peak Area (%) |
|------|-------------------|----------------------|-------------------|------------------|---------------|
| 1    | PDA 254 nm        | 43.942               | 416509            | 4326             | 3.792         |
| 2    | PDA 254 nm        | 49.866               | 10567814          | 80238            | 96.208        |



**(±)- 2-methyl-1-phenylpropan-1-ol:** The racemate was determined by GC equipped with a chiral  $\beta$ -DEX<sup>TM</sup>120 (df = 0.25 $\mu$ m, 0.25 mm i.d. $\times$ 30 m, fused silica capillary column); carrier gas: H<sub>2</sub>; detector temperature: 250 °C; injector temperature: 250 °C; column temperature: 115 °C; inlet pressure = 0.06 MPa.

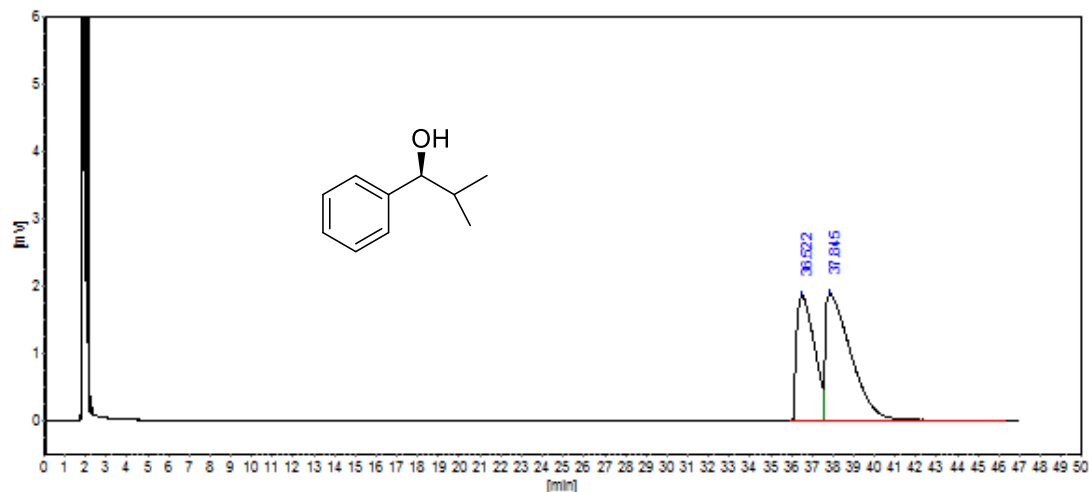

**(S)-2-methyl-1-phenylpropan-1-ol (P22):** 99% ee (S). The enantiomeric excess were determined by GC equipped with a chiral  $\beta$ -DEX<sup>TM</sup>120 (df = 0.25  $\mu$ m, 0.25 mm i.d. $\times$ 30 m, fused silica capillary column); carrier gas: H<sub>2</sub>; detector temperature: 250 °C; injector temperature: 250 °C; column temperature: 115 °C; inlet pressure = 0.06 MPa.

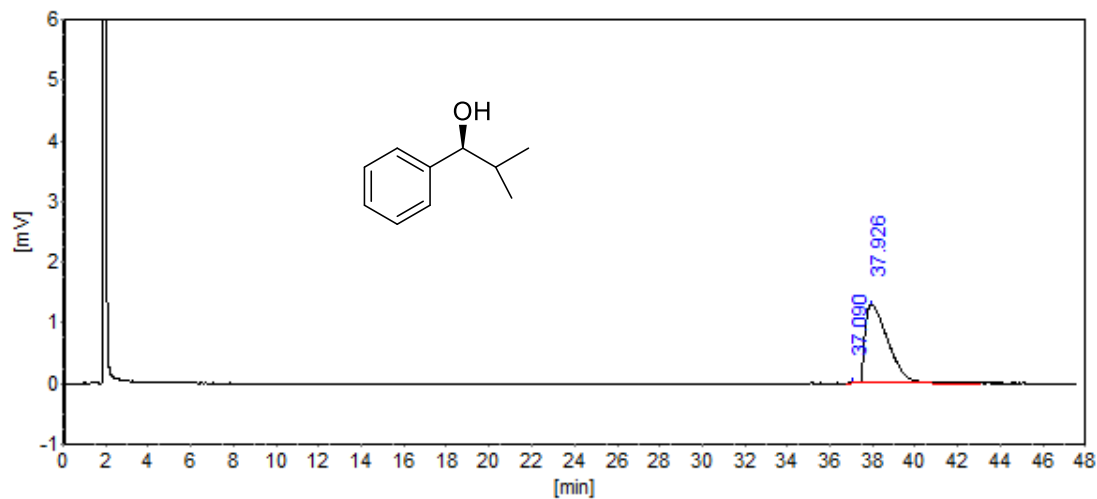

| peak | Retention time<br>[min] | Area<br>[uv*s] | %Area  |
|------|-------------------------|----------------|--------|
| 1    | 37.090                  | 418            | 0.436  |
| 2    | 37.926                  | 95518          | 99.564 |

**(±)-6,7,8,9-tetrahydro-5H-benzo[7]annulen-5-ol:** The racemate was determined by GC equipped with a chiral  $\beta$ -DEX<sup>TM</sup>120 (df = 0.25  $\mu$ m, 0.25 mm i.d.×30 m, fused silica capillary column); carrier gas: H<sub>2</sub>; detector temperature: 250 °C; injector temperature: 250 °C; column temperature: 160 °C; inlet pressure = 0.08 MPa.

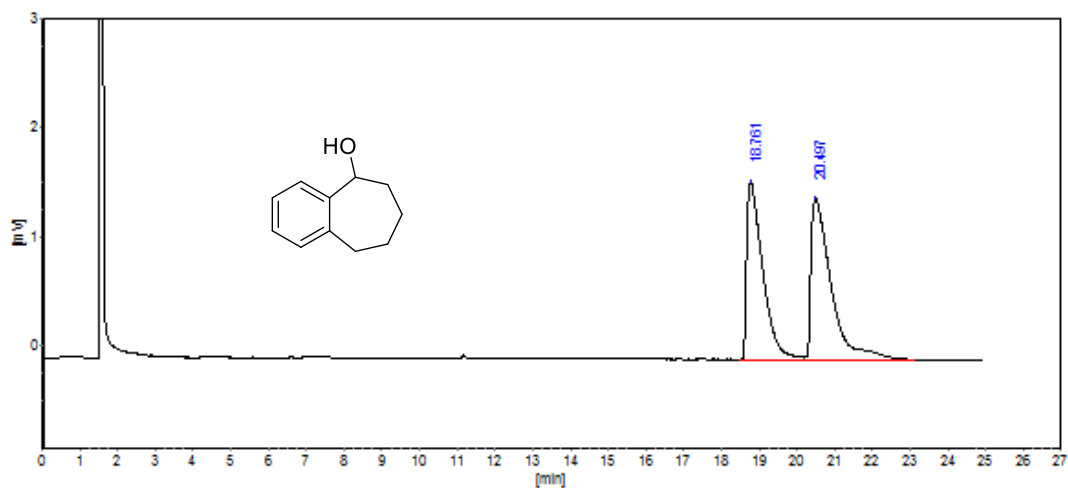

**(S)-6,7,8,9-tetrahydro-5H-benzo[7]annulen-5-ol (P23):** 98% ee (S). The enantiomeric excess were determined by GC equipped with a chiral  $\beta$ -DEX<sup>TM</sup>120 (df = 0.25  $\mu$ m, 0.25 mm i.d.×30 m, fused silica capillary column); carrier gas: H<sub>2</sub>; detector temperature: 250 °C; injector temperature: 250 °C; column temperature: 160 °C; inlet pressure = 0.08 MPa.

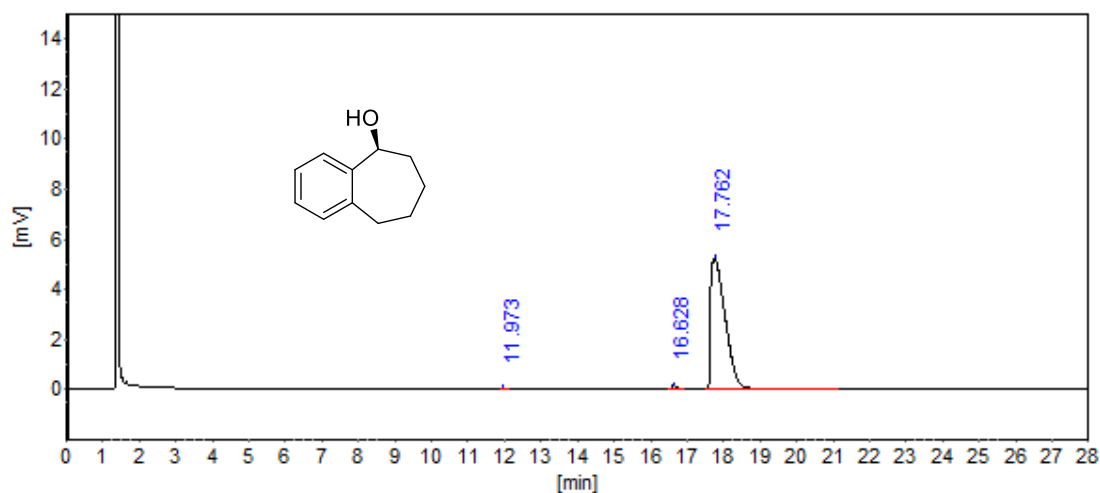

| peak | Retention time<br>[min] | Area<br>[uv*s] | %Area  |
|------|-------------------------|----------------|--------|
| 2    | 16.628                  | 1551           | 1.041  |
| 3    | 17.762                  | 147526         | 98.959 |

**(±)-1-(Thiophen-2-yl)-ethan-1-ol:** The racemate was determined by GC equipped with a chiral  $\beta$ -DEX<sup>TM</sup>120 (df = 0.25  $\mu$ m, 0.25 mm i.d.×30 m, fused silica capillary column); carrier gas: H<sub>2</sub>; detector temperature: 250 °C; injector temperature: 250 °C; column temperature: 115 °C; inlet pressure = 0.06 MPa.

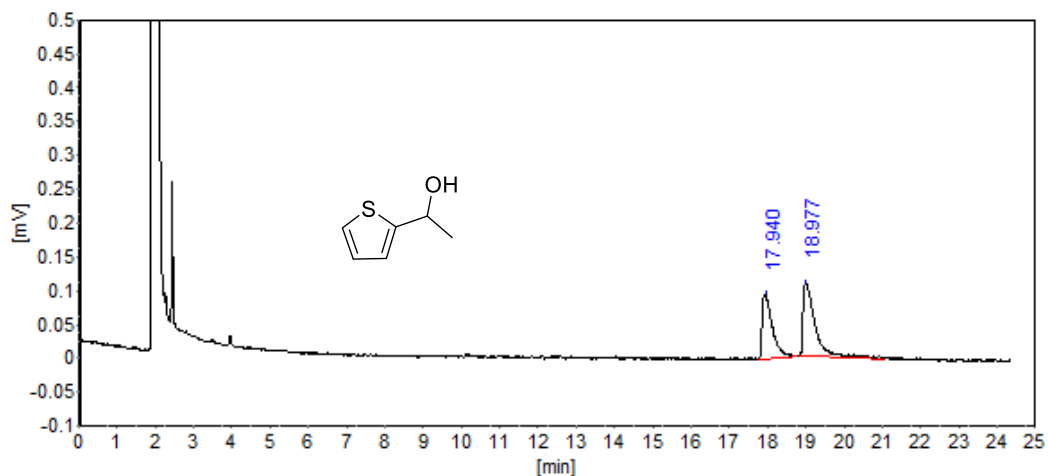

**(S)-1-(Thiophen-2-yl)-ethan-1-ol (P24):** 85% ee (S). The enantiomeric excess were determined by GC equipped with a chiral  $\beta$ -DEX<sup>TM</sup>120 (df = 0.25  $\mu$ m, 0.25 mm i.d.×30 m, fused silica capillary column); carrier gas: H<sub>2</sub>; detector temperature: 250 °C; injector temperature: 250 °C; column temperature: 115 °C; inlet pressure = 0.06 MPa.

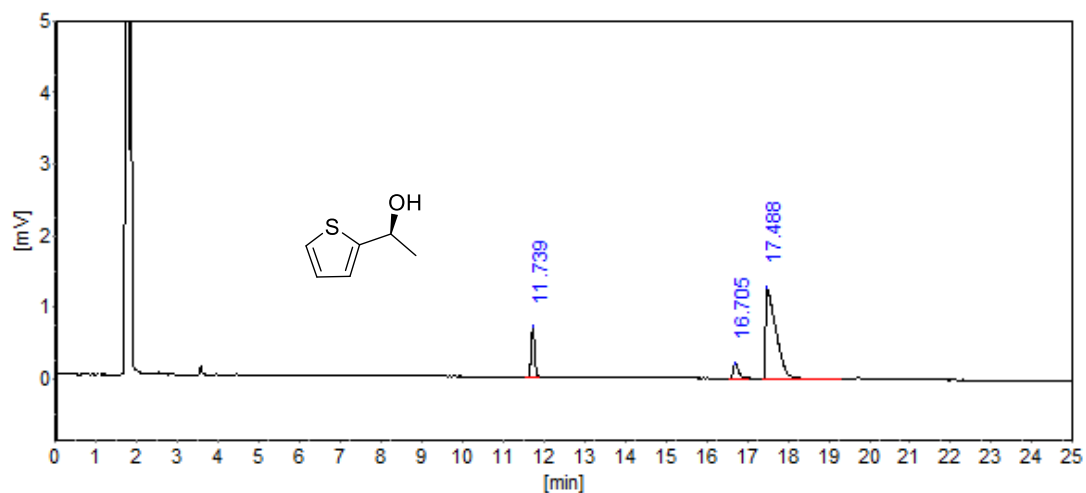

| peak | Retention time<br>[min] | Area<br>[uv*s] | %Area  |
|------|-------------------------|----------------|--------|
| 2    | 16.705                  | 1935           | 7.934  |
| 3    | 17.488                  | 22449          | 92.066 |

**(±)-1-(5-Methyl-thiophen-2-yl)-ethan-1-ol:** The racemate was determined by GC equipped with a chiral  $\beta$ -DEX™120 (df = 0.25  $\mu$ m, 0.25 mm i.d.×30 m, fused silica capillary column); carrier gas: H<sub>2</sub>; detector temperature: 250 °C; injector temperature: 250 °C; column temperature: 115 °C; inlet pressure = 0.06 MPa.

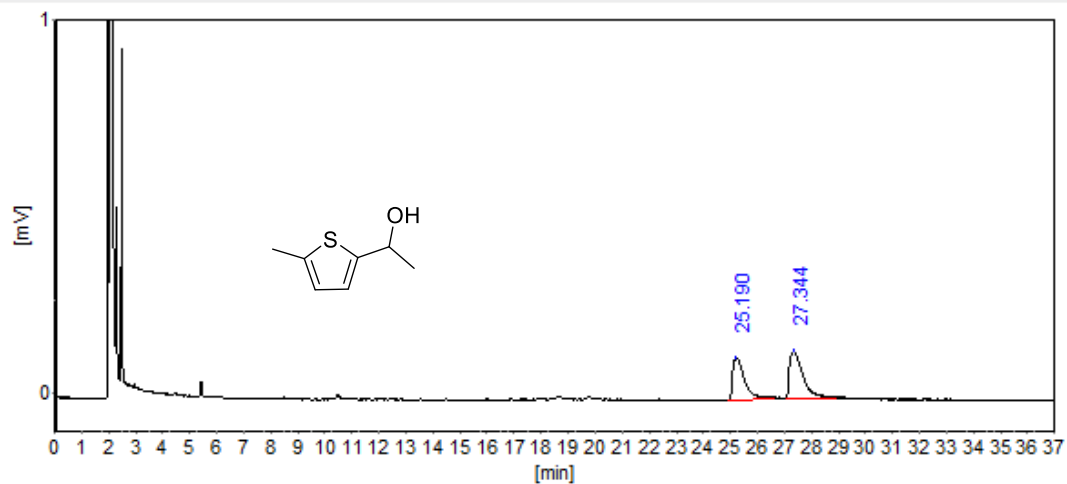

**(S)-1-(5-Methyl-thiophen-2-yl)-ethan-1-ol (P25):** 90% ee (S). The enantiomeric excess were determined by GC equipped with a chiral  $\beta$ -DEX™120 (df = 0.25  $\mu$ m, 0.25 mm i.d.×30 m, fused silica capillary column); carrier gas: H<sub>2</sub>; detector temperature: 250 °C; injector temperature: 250 °C; column temperature: 115 °C; inlet pressure = 0.06 MPa.

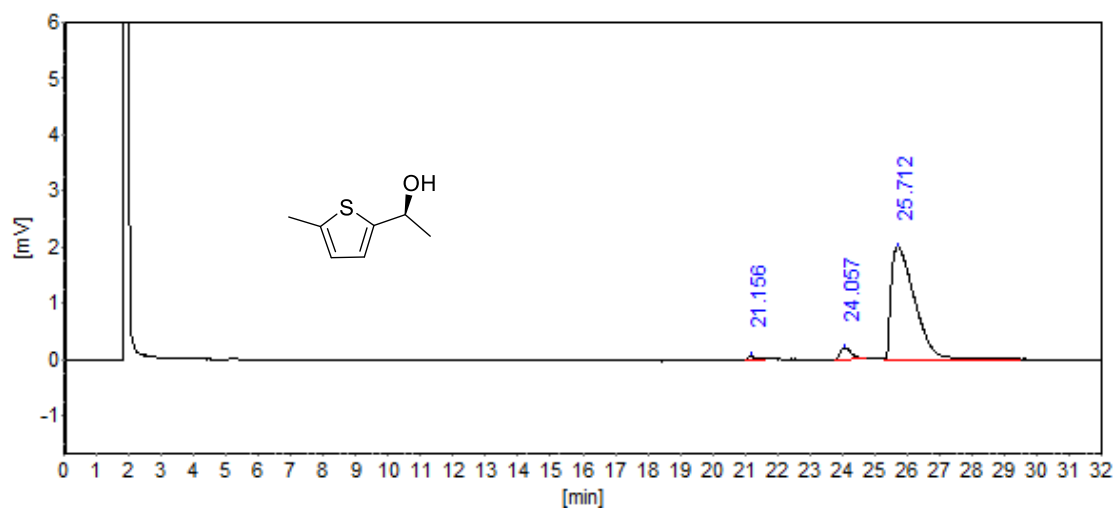

| peak | Retention time<br>[min] | Area<br>[uv*s] | %Area  |
|------|-------------------------|----------------|--------|
| 2    | 24.057                  | 5099           | 4.843  |
| 3    | 25.712                  | 100183         | 95.157 |

**(±)-1-(5-Chlorothiophen-2-yl)-ethan-1-ol:** The racemate was determined by GC equipped with a chiral  $\beta$ -DEX™120 (df = 0.25  $\mu$ m, 0.25 mm i.d.×30 m, fused silica capillary column); carrier gas: H<sub>2</sub>; detector temperature: 250 °C; injector temperature: 250 °C; column temperature: 130 °C; inlet pressure = 0.08 MPa.

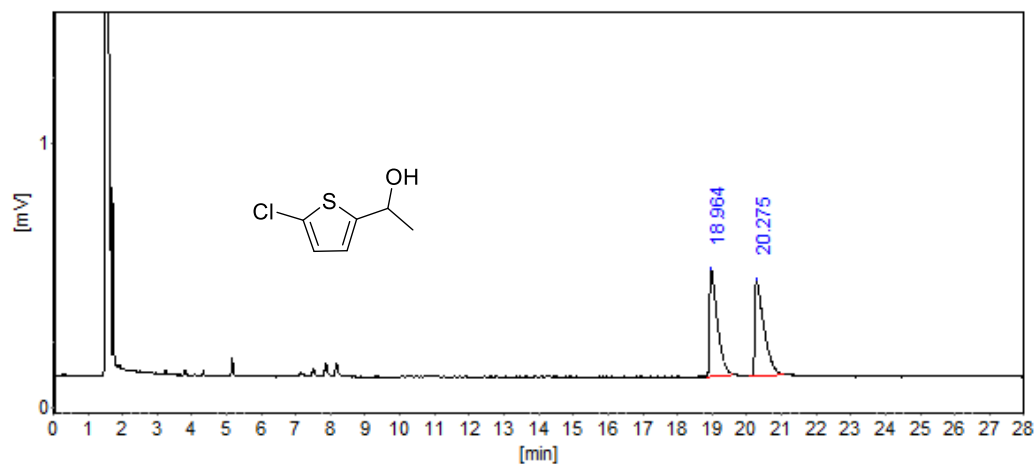

**(S)-1-(5-Chlorothiophen-2-yl)-ethan-1-ol (P26):** 80% ee (S). The enantiomeric excess was determined by GC equipped with a chiral  $\beta$ -DEX™120 (df = 0.25  $\mu$ m, 0.25 mm i.d.×30 m, fused silica capillary column); carrier gas: H<sub>2</sub>; detector temperature: 250 °C; injector temperature: 250 °C; column temperature: 130 °C; inlet pressure = 0.08 MPa.

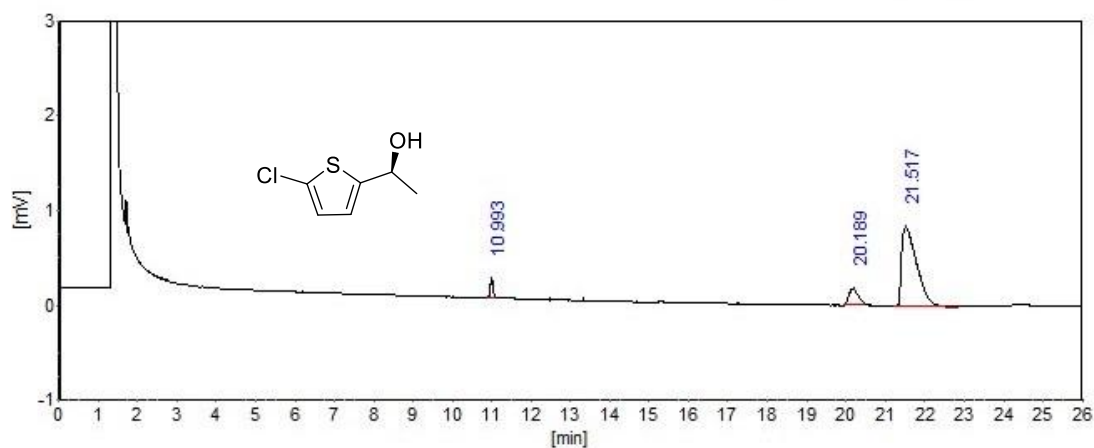

| peak | Retention time<br>[min] | Area<br>[uv*s] | %Area  |
|------|-------------------------|----------------|--------|
| 2    | 20.189                  | 2614           | 10.408 |
| 3    | 21.517                  | 22498          | 89.592 |

**(±)-1-(5-Bromothiophen-2-yl)-ethan-1-ol:** The racemate was determined by GC equipped with a chiral  $\beta$ -DEX™120 (df = 0.25  $\mu$ m, 0.25 mm i.d.x30 m, fused silica capillary column); carrier gas: H<sub>2</sub>; detector temperature: 250 °C; injector temperature: 250 °C; column temperature: 130 °C; inlet pressure = 0.08 MPa.

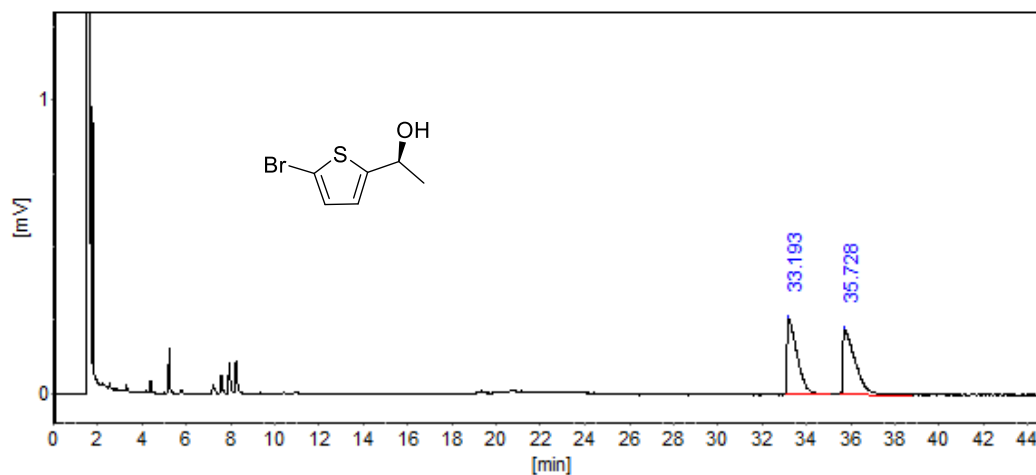

**(S)-1-(5-Bromothiophen-2-yl)-ethan-1-ol (P27):** 80% ee (S). The enantiomeric excess were determined by GC equipped with a chiral  $\beta$ -DEX™120 (df = 0.25 $\mu$ m, 0.25 mm i.d.x30 m, fused silica capillary column); carrier gas: H<sub>2</sub>; detector temperature: 250 °C; injector temperature: 250 °C; column temperature: 130 °C; inlet pressure = 0.08 MPa.

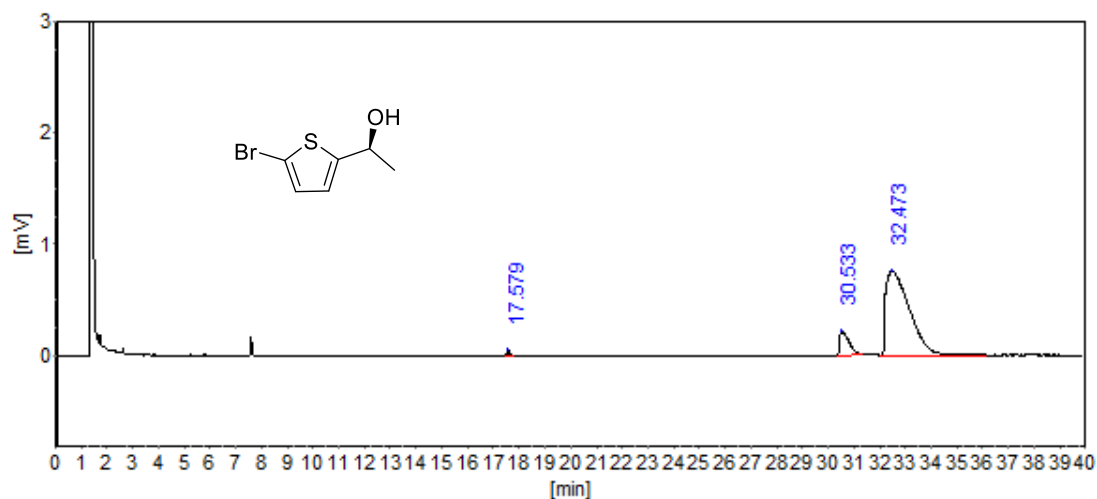

| peak | Retention time<br>[min] | Area<br>[uv*s] | %Area  |
|------|-------------------------|----------------|--------|
| 2    | 30.533                  | 5445           | 9.638  |
| 3    | 32.473                  | 49649          | 90.362 |

**(±)-1-(Thiophen-2-yl)propan-1-ol:** The racemate was determined by GC equipped with a chiral  $\beta$ -DEX<sup>TM</sup>120 (df = 0.25  $\mu$ m, 0.25 mm i.d. $\times$ 30 m, fused silica capillary column); carrier gas: H<sub>2</sub>; detector temperature: 250 °C; injector temperature: 250 °C; column temperature: 115 °C; inlet pressure = 0.06 MPa.

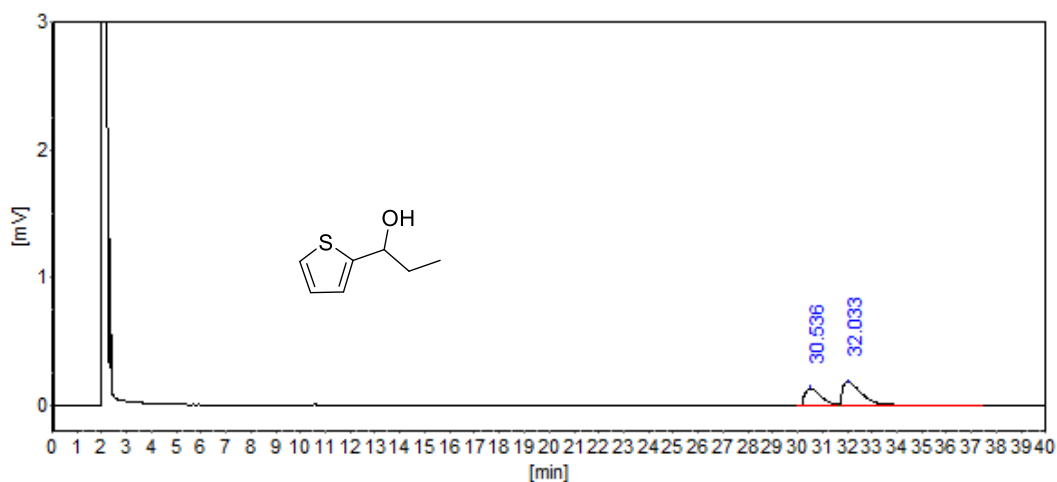

**(S)-1-(Thiophen-2-yl)propan-1-ol (P28):** 99% ee (S). The enantiomeric excess was determined by GC equipped with a chiral  $\beta$ -DEX<sup>TM</sup>120 (df = 0.25  $\mu$ m, 0.25 mm i.d. $\times$ 30 m, fused silica capillary column); carrier gas: H<sub>2</sub>; detector temperature: 250 °C; injector temperature: 250 °C; column temperature: 115 °C; inlet pressure = 0.06 MPa.

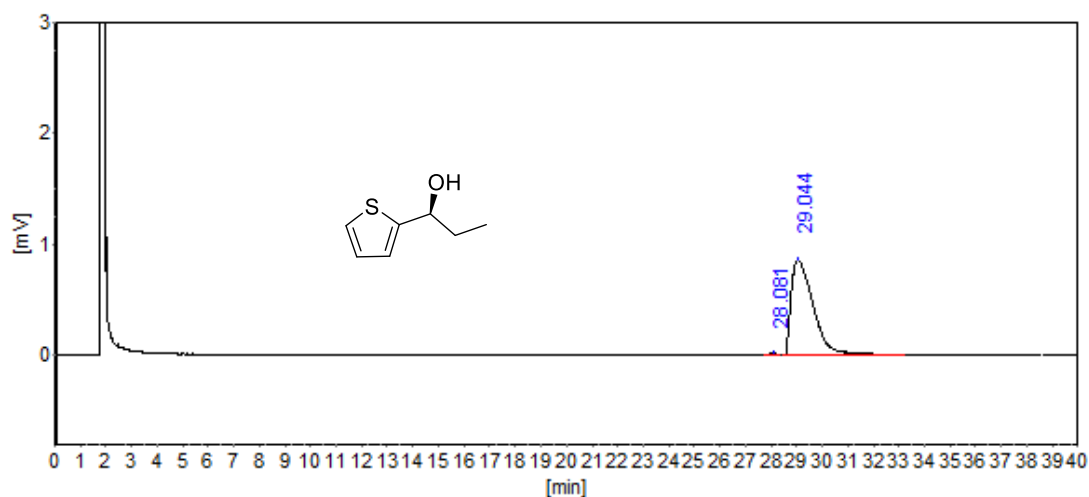

| peak | Retention time<br>[min] | Area<br>[uv*s] | %Area  |
|------|-------------------------|----------------|--------|
| 1    | 28.081                  | 211            | 0.429  |
| 2    | 29.044                  | 51796          | 99.571 |

**(±)-1-(Furan-2-yl)-ethan-1-ol:** The racemate was determined by GC equipped with a chiral  $\beta$ -DEX<sup>TM</sup>120 (df = 0.25 $\mu$ m, 0.25 mm i.d. $\times$ 30 m, fused silica capillary column); carrier gas: H<sub>2</sub>; detector temperature: 250 °C; injector temperature: 250 °C; column temperature: 75 °C; inlet pressure = 0.06 MPa.

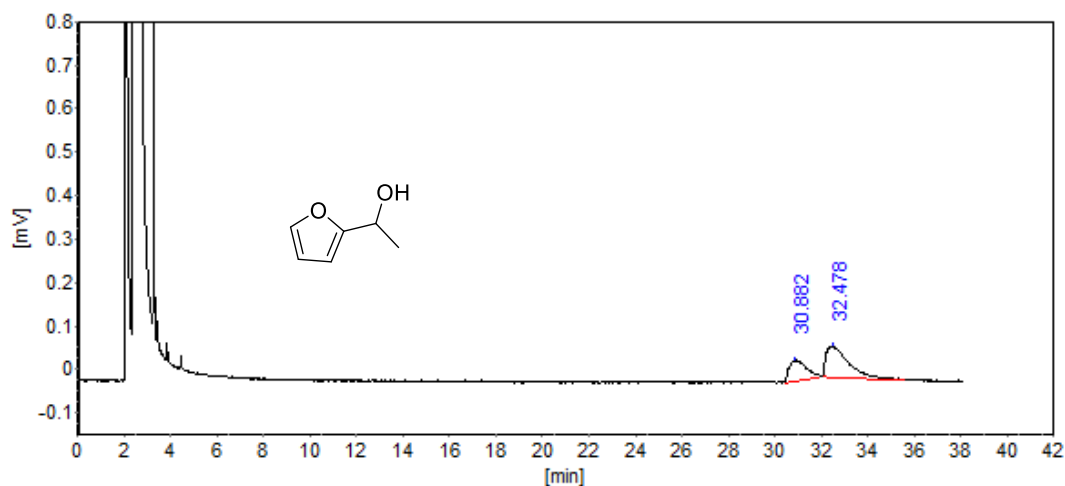

**(S)-1-(Furan-2-yl)-ethan-1-ol (P29):** 93% ee (S). The enantiomeric excess were determined by GC equipped with a chiral  $\beta$ -DEX<sup>TM</sup>120 (df = 0.25  $\mu$ m, 0.25 mm i.d. $\times$ 30 m, fused silica capillary column); carrier gas: H<sub>2</sub>; detector temperature: 250 °C; injector temperature: 250 °C; column temperature: 75 °C; inlet pressure = 0.06 MPa.

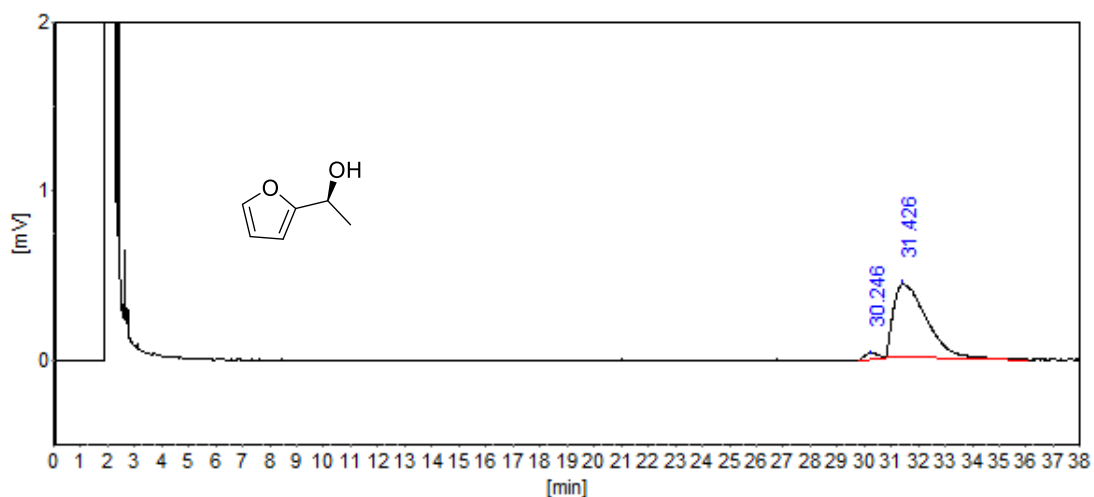

| peak | Retention time<br>[min] | Area<br>[uv*s] | %Area  |
|------|-------------------------|----------------|--------|
| 1    | 30.246                  | 1286           | 3.363  |
| 2    | 31.426                  | 36945          | 96.637 |



**(±)-1-(5-methylfuran-2-yl)ethan-1-ol:** The racemate was determined by GC equipped with a chiral  $\beta$ -DEX<sup>TM</sup>120 ( df = 0.25  $\mu$ m, 0.25 mm i.d. $\times$ 30 m, fused silica capillary column); carrier gas: H<sub>2</sub> ; detector temperature: 250 °C; injector temperature: 250 °C; column temperature: 80 °C; inlet pressure = 0.06 MPa.

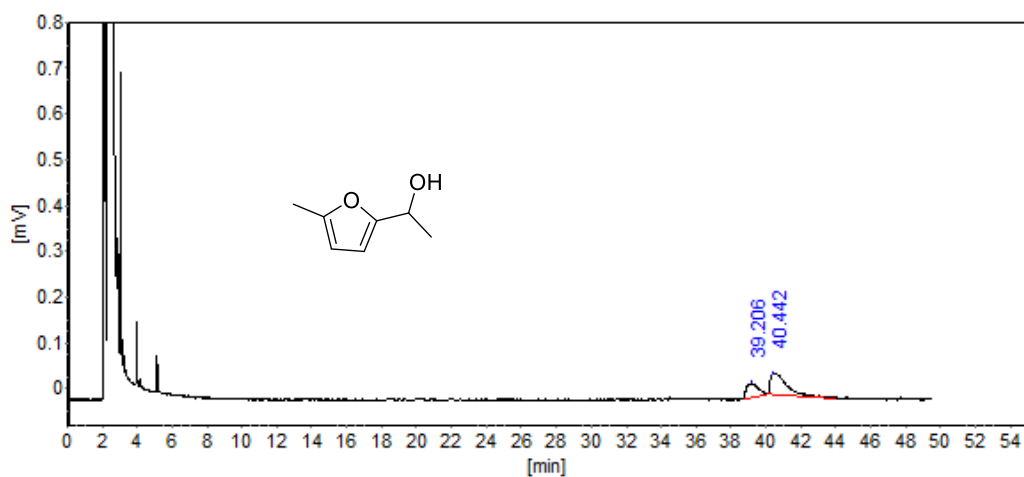

**(S)-1-(5-methylfuran-2-yl)ethan-1-ol (P30):** 81% ee (S). The enantiomeric excess was determined by GC equipped with a chiral  $\beta$ -DEX<sup>TM</sup>120 ( df = 0.25  $\mu$ m, 0.25 mm i.d. $\times$ 30 m, fused silica capillary column); carrier gas: H<sub>2</sub> ; detector temperature: 250 °C; injector temperature: 250 °C; column temperature: 80 °C; inlet pressure = 0.06 MPa.

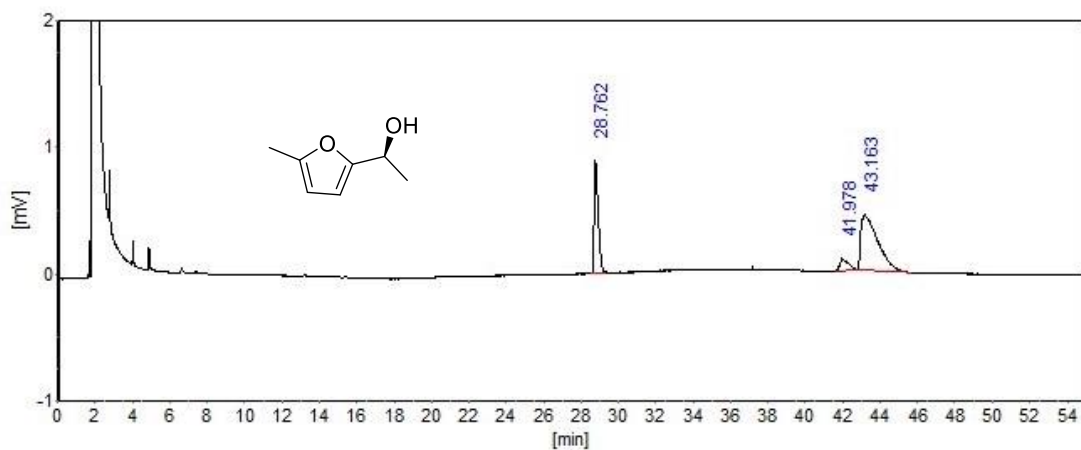

| peak | Retention time<br>[min] | Area<br>[uv*s] | %Area  |
|------|-------------------------|----------------|--------|
| 2    | 41.978                  | 2938           | 9.697  |
| 3    | 43.163                  | 27359          | 90.303 |

**(±)-1-Phenylethanol:** The racemate was determined by GC equipped with a chiral  $\beta$ -DEX<sup>TM</sup>120 (df = 0.25 $\mu$ m, 0.25 mm i.d. $\times$ 30 m, fused silica capillary column); carrier gas: H<sub>2</sub>; injector temperature: 250 °C; detector temperature: 250 °C; column temperature: 115 °C; inlet pressure = 0.08 MPa.

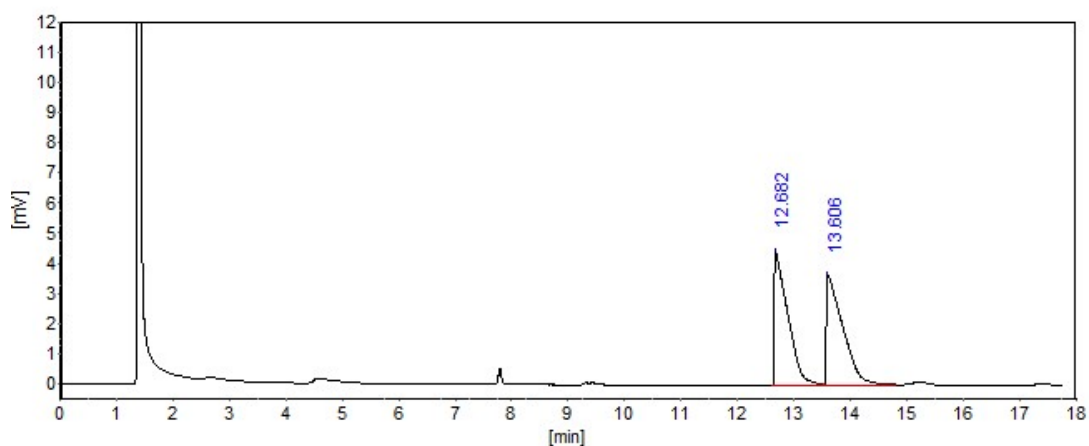

**(R)-1-Phenylethanol (P1):** 82% ee (R). The enantiomeric excess was determined by GC equipped with a chiral  $\beta$ -DEX<sup>TM</sup>120 (df = 0.25 $\mu$ m, 0.25 mm i.d. $\times$ 30 m, fused silica capillary column); carrier gas: H<sub>2</sub>; detector temperature: 250 °C; injector temperature: 250 °C; column temperature: 115 °C; inlet pressure = 0.08 MPa.

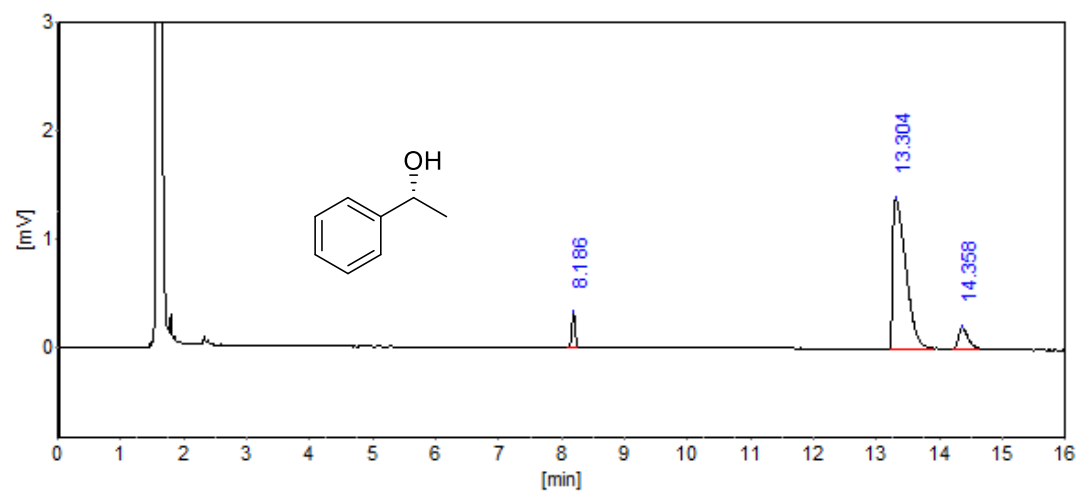

| peak | Retention time<br>[min] | Area<br>[uv*s] | %Area |
|------|-------------------------|----------------|-------|
| 2    | 13.304                  | 20147          | 91.3  |
| 3    | 14.358                  | 2039           | 8.7   |

**(±)-1-o-Tolyl-ethanol:** The racemate was determined by GC equipped with a chiral  $\beta$ -DEX<sup>TM</sup>120 (df = 0.25  $\mu$ m, 0.25 mm i.d. $\times$ 30 m, fused silica capillary column); carrier gas: H<sub>2</sub>; detector temperature: 250 °C; injector temperature: 250 °C; column temperature: 125 °C; inlet pressure = 0.06 MPa.

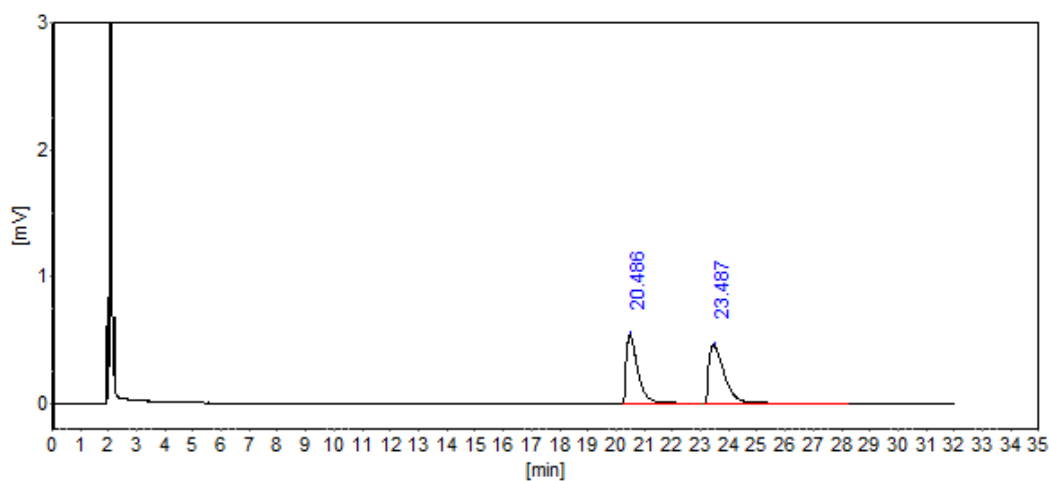

**(R)-1-o-Tolyl-ethanol (P2):** 98% ee (R). The enantiomeric excess was determined by GC equipped with a chiral  $\beta$ -DEX<sup>TM</sup>120 (df = 0.25  $\mu$ m, 0.25 mm i.d. $\times$ 30 m, fused silica capillary column); carrier gas: H<sub>2</sub>; detector temperature: 250 °C; injector temperature: 250 °C; column temperature: 125 °C; inlet pressure = 0.06 MPa.

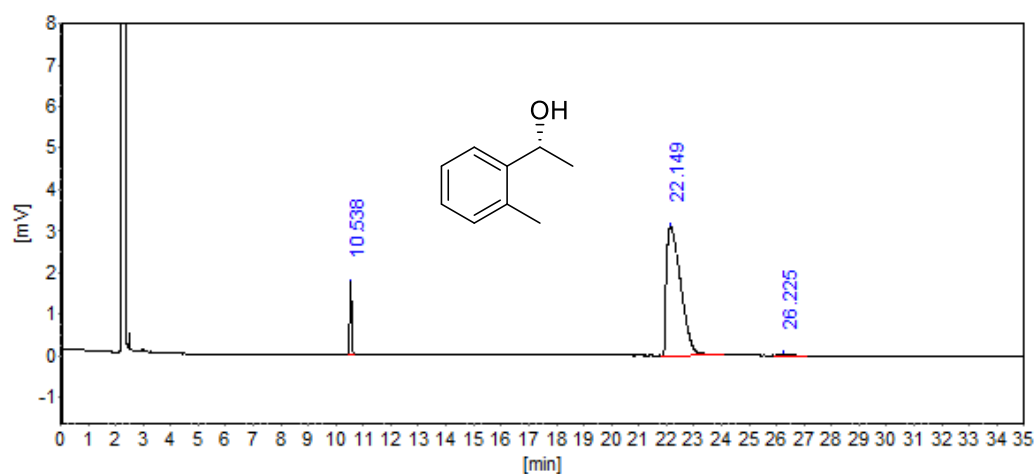

| peak | Retention time<br>[min] | Area<br>[uv*s] | %Area |
|------|-------------------------|----------------|-------|
| 2    | 22.149                  | 112636         | 99.1  |
| 3    | 26.225                  | 1124           | 0.9   |

**(±)-1-(2-Chlorophenyl)-ethan-1-ol:** The racemate was determined by GC equipped with a chiral  $\beta$ -DEX<sup>TM</sup>120 (df = 0.25 $\mu$ m, 0.25 mm i.d. $\times$ 30 m, fused silica capillary column); carrier gas: H<sub>2</sub>; detector temperature: 250 °C; injector temperature: 250 °C; column temperature: 125 °C; inlet pressure = 0.06 MPa.

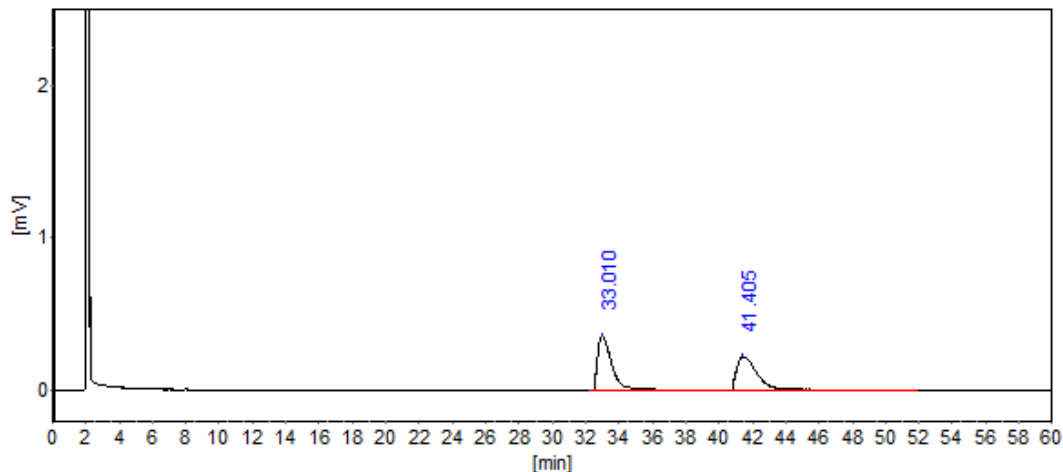

**(R)-1-(2-Chlorophenyl)-ethan-1-ol (P33):** 95% ee (R). The enantiomeric excess was determined by GC equipped with a chiral  $\beta$ -DEX<sup>TM</sup>120 (df = 0.25 $\mu$ m, 0.25 mm i.d. $\times$ 30 m, fused silica capillary column); carrier gas: H<sub>2</sub>; detector temperature: 250 °C; injector temperature: 250 °C; column temperature: 125 °C; inlet pressure = 0.06 MPa.

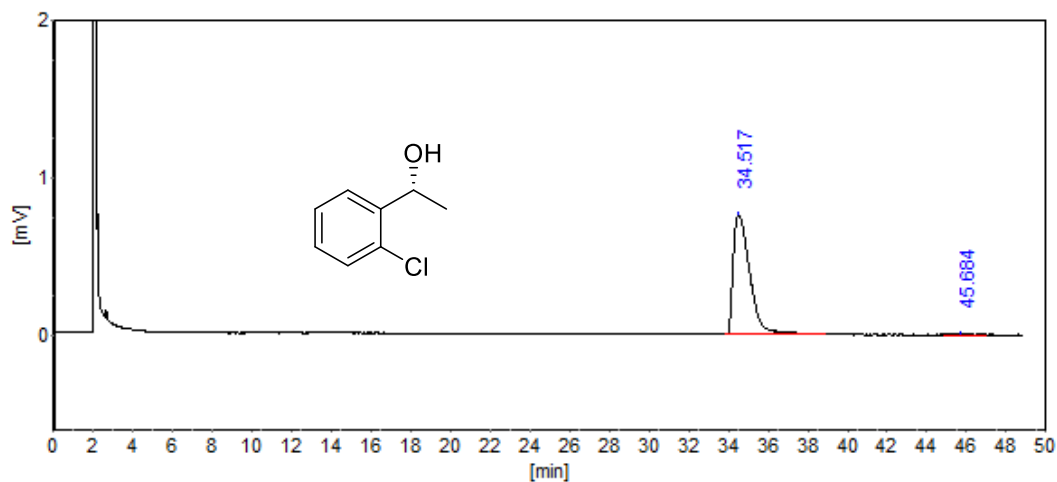

| peak | Retention time<br>[min] | Area<br>[uv*s] | %Area |
|------|-------------------------|----------------|-------|
| 1    | 34.517                  | 44684          | 97.5  |
| 2    | 45.684                  | 810            | 2.5   |

**(±)-1-(2-Trifluoromethyl-phenyl)-ethanol:** The racemate was determined by GC equipped with a chiral  $\beta$ -DEX<sup>TM</sup>120 (df = 0.25 $\mu$ m, 0.25 mm i.d. $\times$ 30 m, fused silica capillary column); carrier gas: H<sub>2</sub>; detector temperature: 250 °C; injector temperature: 250 °C; column temperature: 115 °C; inlet pressure = 0.06 MPa.

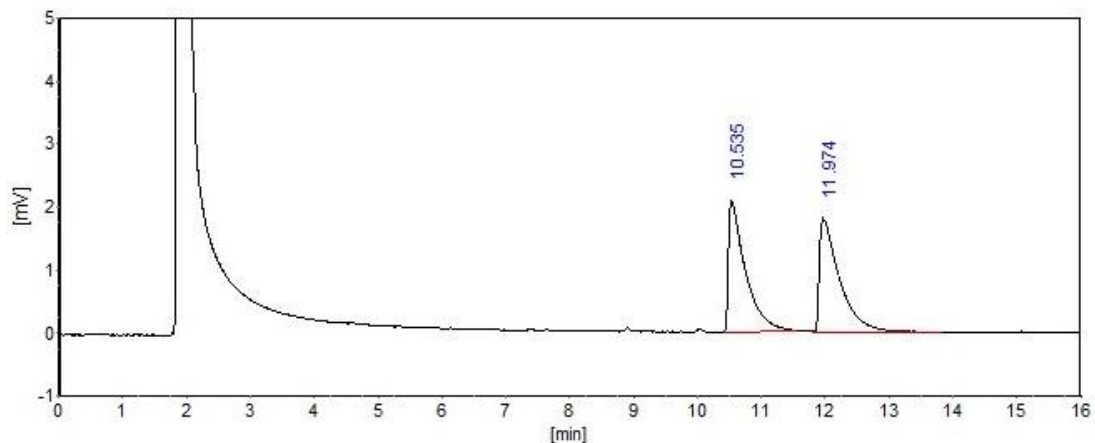

**(R)-1-(2-Trifluoromethyl-phenyl)-ethanol (P34):** 99% ee (R). The enantiomeric excess was determined by GC equipped with a chiral  $\beta$ -DEX<sup>TM</sup>120 (df = 0.25 $\mu$ m, 0.25 mm i.d. $\times$ 30 m, fused silica capillary column); carrier gas: H<sub>2</sub>; detector temperature: 250 °C; injector temperature: 250 °C; column temperature: 115 °C; inlet pressure = 0.06 MPa

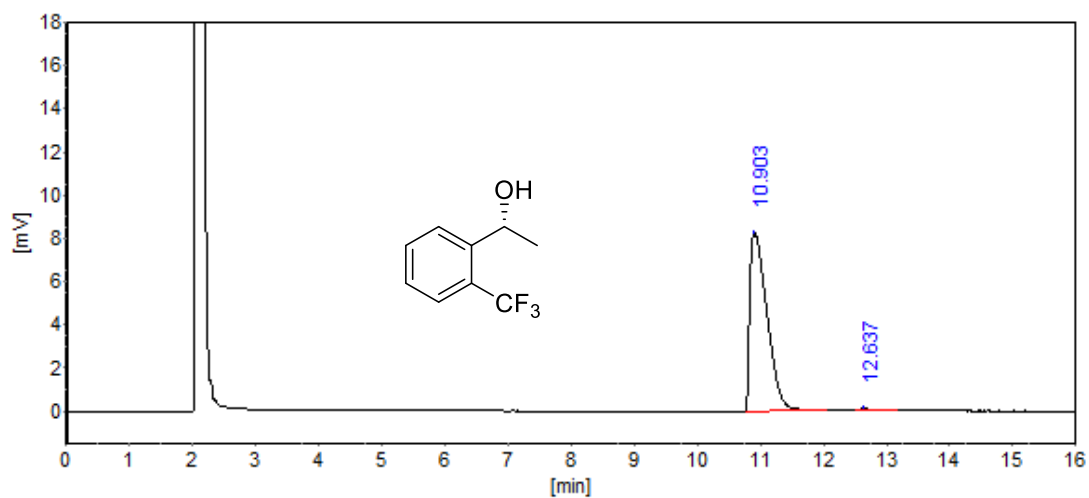

| peak | Retention time<br>[min] | Area<br>[uv*s] | %Area |
|------|-------------------------|----------------|-------|
| 1    | 10.903                  | 156623         | 99.3  |
| 2    | 12.637                  | 1117           | 0.7   |
